# Supplementary material for: Establishing Predictive Models for Solvatochromic Parameters of Ionic Liquids
Source: Front Chem. 2019 Sep 3;7:605. doi: 10.3389/fchem.2019.00605 (PMC6733962; doi:10.3389/fchem.2019.00605)
Supplement: Supplementary file 2 [file Data_Sheet_2.xlsx]

## Sheet: EXPT
Table 1-1: Experimental data taken from literature for α, β and π*.
CATION_ANION	α	β	π*	REFERENCE				NAME	CATION			NAME	ANION
CA083_AN005	0.64	0.3	0.97	10.1016/j.cplett.2010.03.086				3-ethyl-1-methyl-1H-imidazol-3-ium	CA001			trifluoromethanesulfonate	AN001
CA084_AN005	0.52	0.35	0.93	10.1016/j.cplett.2010.03.086				3-butyl-1-methyl-1H-imidazol-3-ium	CA002			octyl sulfate	AN002
CA085_AN005	0.45	0.33	0.97	10.1016/j.cplett.2010.03.086				3-butyl-1,2-dimethyl-1H-imidazol-3-ium	CA003			dimethyl phosphate	AN003
CA001_AN009	0.56	0.41	1.11	10.1021/bm300912y				3-methyl-1-pentyl-1H-imidazol-3-ium	CA004			trifluoroacetate	AN004
CA001_AN029	0.57	1.1	0.96	10.1021/bm300912y				3-hexyl-1-methyl-1H-imidazol-3-ium	CA005			trifluoro[(trifluoromethanesulfonylazanidyl)sulfonyl]methane	AN005
CA001_AN031	0.56	1.1	0.94	10.1021/bm300912y				3-methyl-1-octyl-1H-imidazol-3-ium	CA006			hexafluoro-$l^{5}-phosphanuide	AN006
CA001_AN045	0.54	1.19	0.91	10.1021/bm300912y				3-decyl-1-methyl-1H-imidazol-3-ium	CA007			tetrafluoroboranuide	AN007
CA002_AN037	0.52	1.02	1.01	10.1021/bm300912y				1-butyl-3-methylpyridin-1-ium	CA008			dicyanoazanide	AN008
CA037_AN006	1.17	0.15	1.11	10.1021/bm300912y				1-butyl-1-methylpyrrolidin-1-ium	CA009			perchlorate	AN009
CA037_AN008	0.8	0.51	NA	10.1021/bm300912y				1-methyl-1-pentylpyrrolidin-1-ium	CA010			bromide	AN010
CA037_AN009	1.06	0.16	1.13	10.1021/bm300912y				1-(2-ethoxyethyl)-1-methylpyrrolidin-1-ium	CA011			chloride	AN011
CA037_AN011	0.73	0.68	1.16	10.1021/bm300912y				4-methyl-4-nonylmorpholin-4-ium	CA012			cyanosulfanide	AN012
CA037_AN013	0.77	0.65	1.11	10.1021/bm300912y				1-octylpyridin-1-ium	CA013			nitrooxidane	AN013
CA037_AN037	0.63	0.91	1.06	10.1021/bm300912y				1-methyl-1-octylpyrrolidin-1-ium	CA014			acetate	AN014
CA045_AN037	0.25	1.28	0.84	10.1021/bm300912y				4-methyl-1-octylpyridin-1-ium	CA015			tricyanomethanide	AN015
CA056_AN037	0.25	1.33	0.84	10.1021/bm300912y				3-methyl-1-octylpyridin-1-ium	CA016			iodide	AN016
CA058_AN037	0.25	1.4	0.84	10.1021/bm300912y				2-methyl-1-octylpyridin-1-ium	CA017			methyl sulfate	AN017
CA060_AN037	0.33	1.01	1.11	10.1021/bm300912y				4-heptyl-4-methylmorpholin-4-ium	CA018			2-(cyclohexylamino)ethane-1-sulfonate	AN018
CA068_AN037	0.51	0.99	1.06	10.1021/bm300912y				1-hexylpyridin-1-ium	CA019			(2R)-2-hydroxy-3-(morpholin-4-yl)propane-1-sulfonate	AN019
CA069_AN037	0.53	0.99	1.08	10.1021/bm300912y				1-hexyl-1-methylpyrrolidin-1-ium	CA020			2-aminoacetate	AN020
CA070_AN037	0.54	1	1.02	10.1021/bm300912y				4-methyl-4-pentylmorpholin-4-ium	CA021			(2S)-2-amino-3-methylbutanoate	AN021
CA088_AN014	0.53	1.095	1.041	10.1021/bm300912y				1-butylpyridin-1-ium	CA022			(2R)-2-aminopropanoate	AN022
CA088_AN029	0.704	1.164	0.99	10.1021/bm300912y				4-butyl-4-methylmorpholin-4-ium	CA023			2-[bis(2-hydroxyethyl)amino]ethane-1-sulfonate	AN023
CA089_AN037	0.29	1.04	1.14	10.1021/bm300912y				4-methyl-4-propylmorpholin-4-ium	CA024			hexane-1-sulfonate	AN024
CA037_AN005	1.17	0.34	1.03	10.1021/bm300912y				4-ethyl-4-methylmorpholin-4-ium	CA025			(2Z)-3-carboxyprop-2-enoate	AN025
CA086_AN005	0.45	0.26	0.99	10.1021/jp0653353				1,2,4-trimethyl-1H-pyrazol-2-ium	CA026			3-carboxypropanoate	AN026
CA087_AN005	0.405	0.254	0.984	10.1021/jp0653353				(1R,3S)-1-methyl-3-{[(pentamethyldisilan-1-yl)oxy]methyl}pyrrolidin-1-ium	CA027			(3S)-3-carboxy-3-hydroxypropanoate	AN027
CA005_AN001	0.667	0.52	0.98	10.1021/jp0653353				1-[(2R)-2,3-dihydroxypropyl]-3-methyl-1H-imidazol-3-ium	CA028			methanesulfonate	AN028
CA001_AN003	0.51	1	1.06	10.1021/jp108351f				1-[(2R)-2,3-dihydroxypropyl]-2,3-dimethyl-1H-imidazol-3-ium	CA029			propanoate	AN029
CA001_AN042	0.52	1	1.06	10.1021/jp108351f				4-[(2R)-2,3-dihydroxypropyl]-4-methylmorpholin-4-ium	CA030			2-hydroxyacetate	AN030
CA001_AN043	NA	0.71	NA	10.1021/jp108351f				(2S,4R)-4-[(2R)-2,3-dihydroxypropyl]-2-methylmorpholin-4-ium	CA031			butanoate	AN031
CA001_AN017	0.57	0.61	1.09	10.1021/jp108351f				1-[(2S)-2,3-dihydroxypropyl]-1-methylpiperidin-1-ium	CA032			hexafluorostibanuide	AN032
CA001_AN006	0.66	0.2	0.99	10.1021/jp2045788				(1R,3R)-1-[(2S)-2,3-dihydroxypropyl]-1,3-dimethylpiperidin-1-ium	CA033			hydrogen sulfate	AN033
CA048_AN008	0.514	NA	1.05	10.1021/jp2045788				1-[(2S)-2,3-dihydroxypropyl]-1-methylpyrrolidin-1-ium	CA034			formate	AN034
CA051_AN008	0.89	0.52	1.12	10.1021/jp2045788				(1S,3S)-1-[(2S)-2,3-dihydroxypropyl]-1,3-dimethylpyrrolidin-1-ium	CA035			octane-1-sulfonate	AN035
CA060_AN007	0.4	0.363	1.083	10.1021/jp2045788				1-(3-hydroxypropyl)-3-methyl-1H-imidazol-3-ium	CA036			diethyl phosphate	AN036
CA082_AN005	0.88	0.28	0.976	10.1021/jp2045788				1-(2-hydroxyethyl)-3-methyl-1H-imidazol-3-ium	CA037			hydrogen methylphosphonate	AN037
CA094_AN005	1.2	0.13	1.15	10.1021/jp2045788				(1s,4s)-1-[(2S)-2,3-dihydroxypropyl]-4-hydroxy-1-methylpiperidin-1-ium	CA038			methyl methylphosphonate	AN038
CA094_AN008	0.87	0.47	1.17	10.1021/jp2045788				4-(2-hydroxyethyl)-4-methylmorpholin-4-ium	CA039			dimethoxy(oxo)phosphanuide	AN039
CA094_AN011	1.12	0.99	0.82	10.1021/jp2045788				1-(2-hydroxyethyl)-1-methylpiperidin-1-ium	CA040			(2E)-3-carboxyprop-2-enoate	AN040
CA095_AN005	1.17	0.34	1.03	10.1021/jp2045788				methyltrioctylazanium	CA041			(2E)-2-methylbut-2-enoate	AN041
CA095_AN008	0.8	0.51	1.11	10.1021/jp2045788				trihexyl(tetradecyl)phosphanium	CA042			methyl hydrogen phosphite	AN042
CA095_AN014	0.53	0.9	1.04	10.1021/jp2045788				tetrapentylazanium	CA043			ethyl sulfate	AN043
CA096_AN005	1.13	0.14	1.14	10.1021/jp2045788				tetrabutylazanium	CA044			hydrogen ethylphosphonate	AN044
CA096_AN008	0.9	0.46	1.18	10.1021/jp2045788				tetrabutylphosphanium	CA045			2-methylpropanoate	AN045
CA096_AN013	0.87	0.53	1.19	10.1021/jp2045788				tetrapropylazanium	CA046			hexanoate	AN046
CA097_AN005	0.93	0.11	1.14	10.1021/jp2045788				tris(2-hydroxyethyl)(methyl)azanium	CA047			octanoate	AN047
CA097_AN008	0.84	0.46	1.15	10.1021/jp2045788				3-methyl-1H-imidazol-3-ium	CA048			decanoate	AN048
CA098_AN005	1.23	0.11	1.13	10.1021/jp2045788				3-butyl-1H-imidazol-3-ium	CA049			dodecanoate	AN049
CA098_AN008	0.86	0.53	1.12	10.1021/jp2045788				4-methyl-4-octylmorpholin-4-ium	CA050			tetradecanoate	AN050
CA099_AN005	1.25	0.12	1.11	10.1021/jp2045788				1-(2-hydroxyethyl)-1-methylazepan-1-ium	CA051			hexadecanoate	AN051
CA099_AN008	0.85	0.43	1.2	10.1021/jp2045788				4-hexyl-4-methylmorpholin-4-ium	CA052			octadecanoate	AN052
CA100_AN008	1.02	0.28	1.09	10.1021/jp2045788				1-methyl-3-{[(pentamethyldisilan-1-yl)oxy]methyl}-1H-imidazol-3-ium	CA053			(9Z)-octadec-9-enoate	AN053
CA101_AN005	0.74	0.34	0.91	10.1021/jp2045788				3-{[(heptamethyltrisilan-1-yl)oxy]methyl}-1-methyl-1H-imidazol-3-ium	CA054			(9Z,12Z,15Z)-octadeca-9,12,15-trienoate	AN054
CA102_AN008	0.37	NA	1.03	10.1021/jp2045788				1-butyl-1-methylpiperidin-1-ium	CA055			(2E,4E,6E,8E,10E)-icosa-2,4,6,8,10-pentaenoate	AN055
CA103_AN008	0.31	0.55	1.11	10.1021/jp2045788				tetrahexylphosphanium	CA056
CA104_AN008	0.32	0.56	1.08	10.1021/jp2045788				butyltrimethylazanium	CA057
CA105_AN008	0.36	0.6	1.05	10.1021/jp2045788				tetraoctylphosphanium	CA058
CA106_AN008	0.34	0.55	1.06	10.1021/jp2045788				(2-hydroxyethyl)trimethylazanium	CA059
CA001_AN013	0.48	0.66	1.13	10.1021/jp2045788				3-ethyl-1,2-dimethyl-1H-imidazol-3-ium	CA060
CA001_AN008	0.53	0.35	1.08	10.1021/jp2045788				3-(2-methoxyethyl)-1-methyl-1H-imidazol-3-ium	CA061
CA025_AN008	0.43	0.51	1.12	10.1021/jp2045788				3-benzyl-1-methyl-1H-imidazol-3-ium	CA062
CA024_AN008	0.42	0.49	1.12	10.1021/jp2045788				4-methyl-4-(prop-2-en-1-yl)morpholin-4-ium	CA063
CA023_AN008	0.38	0.53	1.12	10.1021/jp2045788				butyl(ethyl)dimethylazanium	CA064
CA002_AN008	0.464	0.708	1.13	10.1021/jp2045788				butyldiethyl(2-methoxyethyl)azanium	CA065
CA001_AN005	0.627	0.225	0.998	10.1021/jp2045788				1-(2-ethoxyethyl)-1-methylpiperidin-1-ium	CA066
CA004_AN005	0.427	0.252	0.954	10.1021/jp2045788				4-(2-ethoxyethyl)-4-methylmorpholin-4-ium	CA067
CA082_AN008	0.69	0.47	1.14	10.1021/jp2045788				1-ethenyl-3-methyl-1H-imidazol-3-ium	CA068
CA013_AN005	0.564	0.115	0.965	10.1021/jp2045788				1,3-dimethyl-1H-imidazol-3-ium	CA069
CA050_AN008	0.35	0.54	1.11	10.1021/jp2045788				3-methyl-1-propyl-1H-imidazol-3-ium	CA070
CA022_AN005	0.643	0.123	0.816	10.1021/jp2045788				3-heptyl-1-methyl-1H-imidazol-3-ium	CA071
CA059_AN029	0.52	0.98	1.05	10.1039/b706571j				3-methyl-1-nonyl-1H-imidazol-3-ium	CA072
CA059_AN040	0.75	0.58	1.08	10.1039/b706571j				1,3-dipentyl-1H-imidazol-3-ium	CA073
CA059_AN041	0.59	0.95	1.04	10.1039/b706571j				1,3-dihexyl-1H-imidazol-3-ium	CA074
CA001_AN037	0.52	1	1.06	10.1039/b713289a				1,3-diheptyl-1H-imidazol-3-ium	CA075
CA001_AN038	0.5	1.07	1.04	10.1039/b713289a				3-methyl-1-propylpyridin-1-ium	CA076
CA001_AN039	0.51	1	1.06	10.1039/b713289a				triethylsulfanium	CA077
CA093_AN037	0.51	0.99	1.06	10.1039/c003976d				1-ethyl-2H,3H,4H,6H,7H,8H,9H,10H-pyrimido[1,2-a]azepin-1-ium	CA078
CA001_AN024	0.65	0.71	0.98	10.1039/c1cp21262a				2H,3H,4H,6H,7H,8H,9H,10H-pyrimido[1,2-a]azepin-1-ium	CA079
CA001_AN035	0.65	0.77	0.93	10.1039/c1cp21262a				2H,3H,5H,6H,7H,8H,9H-imidazo[1,2-a]azepin-1-ium	CA080
CA002_AN025	0.34	1.02	1.11	10.1039/c1cp21262a				1-ethyl-2H,3H,5H,6H,7H,8H,9H-imidazo[1,2-a]azepin-1-ium	CA081
CA002_AN026	0.39	1.08	1.09	10.1039/c1cp21262a				1-butyl-1-methylazepan-1-ium	CA082
CA002_AN027	0.41	1	1.1	10.1039/c1cp21262a				1-(3-cyanopropyl)-1-methylpyrrolidin-1-ium	CA083
CA002_AN029	0.48	1.16	0.94	10.1039/c1cp21262a				1-methyl-1-(pent-4-en-1-yl)pyrrolidin-1-ium	CA084
CA002_AN030	0.44	0.87	1.12	10.1039/c1cp21262a				1-[4,5-bis(methylsulfanyl)pentyl]-1-methylpyrrolidin-1-ium	CA085
CA002_AN032	0.62	0.15	1.04	10.1039/c1cp21262a				3-hexyl-1,2-dimethyl-1H-imidazol-3-ium	CA086
CA002_AN035	0.69	0.79	0.89	10.1039/c1cp21262a				4-(dimethylamino)-1-hexyl-3-methylpyridin-1-ium	CA087
CA009_AN003	0.24	1.14	1.02	10.1039/c1cp21262a				[bis(dimethylamino)methylidene]azanium	CA088
CA013_AN007	0.54	0.34	0.97	10.1039/c1cp21262a				triethyl(methyl)azanium	CA089
CA016_AN007	0.51	0.44	1	10.1039/c1cp21262a				trihexyl(octyl)phosphanium	CA090
CA022_AN007	0.53	0.21	1.08	10.1039/c1cp21262a				ethanaminium	CA091
CA025_AN005	0.5	0.19	1.01	10.1039/c1cp21262a				1-butyl-4-methylpyridin-1-ium	CA092
CA026_AN001	0.43	0.25	0.94	10.1039/c1cp21262a				1-methyl-3-(prop-2-en-1-yl)-1H-imidazol-3-ium	CA093
CA027_AN005	0.59	0.28	0.89	10.1039/c1cp21262a				1-(2,3-dihydroxypropyl)-1-methyl-1H-imidazol-1-ium	CA094
CA028_AN005	1.2	0.13	1.15	10.1039/c1cp21262a				3-(1-hydroxyethyl)-1-methyl-1H-imidazol-3-ium	CA095
CA028_AN008	0.87	0.47	1.17	10.1039/c1cp21262a				1-(2,3-dihydroxypropyl)-1-methylpyrrolidin-1-ium	CA096
CA028_AN011	1.12	0.99	0.82	10.1039/c1cp21262a				3-(2,3-dihydroxypropyl)-1,2-dimethyl-1H-imidazol-3-ium	CA097
CA029_AN005	0.93	0.11	1.14	10.1039/c1cp21262a				1-(2,3-dihydroxypropyl)-1-methylpiperidin-1-ium	CA098
CA029_AN008	0.87	0.47	1.17	10.1039/c1cp21262a				4-(2,3-dihydroxypropyl)-4-methylmorpholin-4-ium	CA099
CA030_AN008	0.85	0.43	1.2	10.1039/c1cp21262a				1-(2,3-dihydroxypropyl)-4-hydroxy-1-methylpiperidin-1-ium	CA100
CA031_AN005	1.25	0.12	1.11	10.1039/c1cp21262a				1-methyl-1-propylpyrrolidin-1-ium	CA101
CA032_AN008	0.86	0.53	1.12	10.1039/c1cp21262a				1-ethyl-1-methylpyrrolidin-1-ium	CA102
CA033_AN005	1.23	0.11	1.13	10.1039/c1cp21262a				1-hexyl-1,4-diazabicyclo[2.2.2]octan-1-ium	CA103
CA034_AN008	0.9	0.46	1.18	10.1039/c1cp21262a				1-heptyl-1,4-diazabicyclo[2.2.2]octan-1-ium	CA104
CA034_AN013	0.87	0.53	1.19	10.1039/c1cp21262a				1-nonyl-1,4-diazabicyclo[2.2.2]octan-1-ium	CA105
CA035_AN005	1.13	0.14	1.14	10.1039/c1cp21262a				1-undecyl-1,4-diazabicyclo[2.2.2]octan-1-ium	CA106
CA036_AN014	0.51	0.99	1.08	10.1039/c1cp21262a				butan-2-aminium	CA107
CA043_AN018	0.5	0.91	0.95	10.1039/c1cp21262a				butan-1-aminium	CA108
CA043_AN019	0.33	0.96	0.98	10.1039/c1cp21262a				dipropylazanium	CA109
CA043_AN023	0.47	1	0.95	10.1039/c1cp21262a				tributylazanium	CA110
CA044_AN018	0.56	0.98	0.97	10.1039/c1cp21262a
CA044_AN019	0.28	0.74	0.98	10.1039/c1cp21262a
CA044_AN023	0.31	0.81	1.06	10.1039/c1cp21262a
CA045_AN020	0.18	1.61	0.93	10.1039/c1cp21262a
CA045_AN021	0.96	1.46	0.93	10.1039/c1cp21262a
CA045_AN022	0.88	1.04	0.98	10.1039/c1cp21262a
CA046_AN018	0.54	0.8	1.02	10.1039/c1cp21262a
CA046_AN019	0.22	0.83	0.98	10.1039/c1cp21262a
CA047_AN001	1.06	0.29	1.16	10.1039/c1cp21262a
CA047_AN017	1.1	0.44	1.14	10.1039/c1cp21262a
CA053_AN005	0.65	0.28	0.91	10.1039/c1cp21262a
CA054_AN005	0.79	0.33	0.88	10.1039/c1cp21262a
CA002_AN001	0.62	0.49	1	10.1039/c1cp21262a
CA001_AN014	0.57	1.06	0.97	10.1039/c1cp21262a
CA002_AN003	0.45	1.13	0.98	10.1039/c1cp21262a
CA037_AN014	0.53	0.9	1.04	10.1039/c1cp21262a
CA002_AN017	0.53	0.66	1.06	10.1039/c1cp21262a
CA002_AN028	0.44	0.77	1.02	10.1039/c1cp21262a
CA002_AN031	0.51	1.23	0.92	10.1039/c1cp21262a
CA003_AN005	0.38	0.26	1.02	10.1039/c1cp21262a
CA003_AN007	0.39	0.36	1.08	10.1039/c1cp21262a
CA005_AN005	0.65	0.26	0.97	10.1039/c1cp21262a
CA005_AN011	0.48	0.94	1.02	10.1039/c1cp21262a
CA005_AN010	0.45	0.74	1.09	10.1039/c1cp21262a
CA015_AN005	0.5	0.33	0.97	10.1039/c1cp21262a
CA016_AN005	0.5	0.33	0.97	10.1039/c1cp21262a
CA017_AN005	0.48	0.35	0.95	10.1039/c1cp21262a
CA014_AN005	0.8	0.08	0.73	10.1039/c1cp21262a
CA039_AN008	0.78	0.49	1.13	10.1039/c1cp21262a
CA006_AN005	0.6	0.29	0.96	10.1039/c1cp21262a
CA040_AN008	0.78	0.51	1.11	10.1039/c1cp21262a
CA055_AN008	0.31	0.49	1.13	10.1039/c1cp21262a
CA052_AN008	0.38	0.55	1.11	10.1039/c1cp21262a
CA018_AN008	0.35	0.54	1.11	10.1039/c1cp21262a
CA020_AN005	0.76	0.06	0.81	10.1039/c1cp21262a
CA021_AN008	0.38	0.54	1.11	10.1039/c1cp21262a
CA019_AN005	0.5	0.07	0.98	10.1039/c1cp21262a
CA011_AN005	0.49	0.28	0.93	10.1039/c1cp21262a
CA010_AN005	0.44	0.26	0.95	10.1039/c1cp21262a
CA012_AN008	0.36	0.54	1.11	10.1039/c1cp21262a
CA009_AN005	0.43	0.24	0.95	10.1039/c1cp21262a
CA006_AN007	0.62	0.41	0.98	10.1039/c1cp21262a
CA006_AN008	0.35	0.54	1.11	10.1039/c1cp21262a
CA041_AN005	0.33	0.23	0.87	10.1039/c1cp21262a
CA042_AN005	0.37	0.27	0.83	10.1039/c1cp21262a
CA048_AN029	-0.06	0.1	1.5	10.1039/c2cp23256a
CA048_AN033	1.225	0.61	1.17	10.1039/c2cp23256a
CA048_AN034	0.812	0.81	1.1	10.1039/c2cp23256a
CA049_AN014	0.938	0.73	0.88	10.1039/c2cp23256a
CA048_AN014	0.506	0.85	1.03	10.1039/c2cp23256a
CA049_AN029	0.806	0.63	1.01	10.1039/c2cp23256a
CA049_AN033	1.415	0.58	1.12	10.1039/c2cp23256a
CA049_AN034	0.945	0.73	0.97	10.1039/c2cp23256a
CA061_AN005	0.78	0.29	0.96	10.1039/C2NJ20965A
CA061_AN008	0.51	0.56	1.11	10.1039/C2NJ20965A
CA064_AN005	1.16	0.27	0.89	10.1039/C2NJ20965A
CA064_AN008	0.43	0.58	0.97	10.1039/C2NJ20965A
CA065_AN005	1.16	0.3	0.87	10.1039/C2NJ20965A
CA065_AN008	0.42	0.61	0.99	10.1039/C2NJ20965A
CA045_AN044	0.18	1.31	0.98	10.1039/c3cp44214d
CA056_AN044	0.22	1.35	0.89	10.1039/c3cp44214d
CA090_AN044	0.22	1.37	0.89	10.1039/c3cp44214d
CA002_AN002	NA	0.8	NA	10.1039/C3CP55285C
CA002_AN004	NA	0.84	NA	10.1039/C3CP55285C
CA002_AN009	NA	0.55	NA	10.1039/C3CP55285C
CA002_AN010	NA	0.87	NA	10.1039/C3CP55285C
CA002_AN011	NA	0.84	NA	10.1039/C3CP55285C
CA002_AN012	NA	0.71	NA	10.1039/C3CP55285C
CA002_AN015	NA	0.54	NA	10.1039/C3CP55285C
CA002_AN016	NA	0.75	NA	10.1039/C3CP55285C
CA005_AN006	NA	0.5	NA	10.1039/C3CP55285C
CA005_AN007	NA	0.6	NA	10.1039/C3CP55285C
CA005_AN008	NA	0.69	NA	10.1039/C3CP55285C
CA005_AN013	NA	0.76	NA	10.1039/C3CP55285C
CA006_AN001	NA	0.64	NA	10.1039/C3CP55285C
CA006_AN006	NA	0.53	NA	10.1039/C3CP55285C
CA006_AN011	NA	0.98	NA	10.1039/C3CP55285C
CA006_AN013	NA	0.8	NA	10.1039/C3CP55285C
CA007_AN001	NA	0.65	NA	10.1039/C3CP55285C
CA007_AN005	NA	0.49	NA	10.1039/C3CP55285C
CA007_AN006	NA	0.55	NA	10.1039/C3CP55285C
CA007_AN007	NA	0.65	NA	10.1039/C3CP55285C
CA007_AN008	NA	0.75	NA	10.1039/C3CP55285C
CA007_AN011	NA	0.98	NA	10.1039/C3CP55285C
CA007_AN013	NA	0.81	NA	10.1039/C3CP55285C
CA008_AN005	NA	0.25	NA	10.1039/C3CP55285C
CA025_AN014	0.36	1.1	1.17	10.1039/C3GC41733F
CA063_AN014	0.25	1.12	1.15	10.1039/C3GC41733F
CA062_AN014	0.44	1.05	1.09	10.1039/C3GC41733F
CA061_AN014	0.51	1.1	1.06	10.1039/C3GC41733F
CA002_AN013	0.517	0.644	1.06	10.1039/C3RA44464C
CA002_AN006	0.63	0.196	0.991	10.1039/C3RA44464C
CA002_AN014	0.437	1.122	0.974	10.1039/C3RA44464C
CA002_AN005	0.647	0.306	0.903	10.1039/C3RA44464C
CA002_AN007	0.643	0.407	0.991	10.1039/C3RA44464C
CA055_AN005	0.444	0.255	0.94	10.1039/C5CP03094C
CA057_AN005	0.583	0.273	0.914	10.1039/C5CP03094C
CA069_AN005	0.82	0.203	0.967	10.1039/C5CP03094C
CA070_AN005	0.779	0.231	0.955	10.1039/C5CP03094C
CA071_AN005	0.649	0.282	0.942	10.1039/C5CP03094C
CA072_AN005	0.634	0.265	0.942	10.1039/C5CP03094C
CA073_AN005	0.556	0.317	0.935	10.1039/C5CP03094C
CA074_AN005	0.562	0.326	0.926	10.1039/C5CP03094C
CA075_AN005	0.565	0.323	0.933	10.1039/C5CP03094C
CA076_AN005	0.509	0.256	0.977	10.1039/C5CP03094C
CA077_AN005	0.514	0.181	0.946	10.1039/C5CP03094C
CA066_AN005	0.52	0.28	0.92	10.1039/C7CP08134K
CA067_AN005	0.55	0.24	0.96	10.1039/C7CP08134K
CA078_AN036	0.49	1.09	1.01	10.1039/c7gc02671d
CA079_AN014	0.56	1.05	1.77	10.1039/c7gc02671d
CA080_AN014	0.62	1.17	1.01	10.1039/c7gc02671d
CA081_AN014	0.42	1.19	1.35	10.1039/c7gc02671d
CA081_AN036	0.65	1.11	1.85	10.1039/c7gc02671d
CA092_AN005	0.51	0.29	0.98	10.1021/jp076895k
CA091_AN013	0.85	0.46	1.24	10.1016/j.chroma.2003.10.127
CA095_AN006	1.17	0.15	1.11	10.1021/jp911430t
CA095_AN009	1.06	0.16	1.13	10.1021/jp911430t
CA095_AN013	0.77	0.65	1.11	10.1021/jp911430t
CA095_AN011	0.73	0.68	1.16	10.1021/jp911430t
CA036_AN005	0.9	0.24	1.06	10.1021/jp911430t
CA107_AN012	0.91	NA	1.28	10.1016/j.chroma.2003.10.127
CA108_AN012	0.92	NA	1.23	10.1016/j.chroma.2003.10.127
CA109_AN012	0.97	0.39	1.16	10.1016/j.chroma.2003.10.127
CA110_AN013	0.84	NA	0.97	10.1016/j.chroma.2003.10.127

## Sheet: ILTESTED
Table 1-2: Predicted values for β
CATION	ANION	CHEMICAL NAME	CHEMICAL NAME	beta	ln(gamma)
C0033	A0012	3-hydroxy-1-methylpyridin-1-ium	dihydrogen phosphate	0.903756	-6.5354
C0033	A0017	3-hydroxy-1-methylpyridin-1-ium	hydrogen sulfate	0.546443	0.25742
C0033	A0024	3-hydroxy-1-methylpyridin-1-ium	formate	0.884038	-11.2303
C0033	A0030	3-hydroxy-1-methylpyridin-1-ium	4-methylbenzene-1-sulfonate	0.684491	-2.95114
C0033	A0031	3-hydroxy-1-methylpyridin-1-ium	benzoate	0.822833	-7.95619
C0033	A0033	3-hydroxy-1-methylpyridin-1-ium	chloride	1.08098	-11.9886
C0033	A0039	3-hydroxy-1-methylpyridin-1-ium	(2E)-3-carboxyprop-2-enoate	0.706321	-3.08504
C0033	A0044	3-hydroxy-1-methylpyridin-1-ium	methyl sulfate	0.573885	-1.50627
C0033	A0047	3-hydroxy-1-methylpyridin-1-ium	(2E)-but-2-enoate	0.934271	-10.7806
C0033	A0050	3-hydroxy-1-methylpyridin-1-ium	butyl sulfate	0.625819	-2.23241
C0033	A0051	3-hydroxy-1-methylpyridin-1-ium	perchlorate	0.239785	2.21106
C0033	A0054	3-hydroxy-1-methylpyridin-1-ium	methanesulfonate	0.730859	-5.27942
C0033	A0062	3-hydroxy-1-methylpyridin-1-ium	nitrite	0.728816	-6.72089
C0033	A0063	3-hydroxy-1-methylpyridin-1-ium	dinitroazanide	0.260572	2.64322
C0033	A0064	3-hydroxy-1-methylpyridin-1-ium	trifluoroacetate	0.448834	-2.72031
C0033	A0070	3-hydroxy-1-methylpyridin-1-ium	hydrogen carbonate	0.849723	-8.51501
C0033	A0077	3-hydroxy-1-methylpyridin-1-ium	pentyl sulfate	0.640437	-2.33794
C0033	A0081	3-hydroxy-1-methylpyridin-1-ium	(2S)-2-hydroxypropanoate	0.670544	-6.82886
C0033	A0083	3-hydroxy-1-methylpyridin-1-ium	ethyl sulfate	0.600438	-1.92914
C0033	A0084	3-hydroxy-1-methylpyridin-1-ium	trifluoromethanesulfonate	0.306041	0.89976
C0033	A0087	3-hydroxy-1-methylpyridin-1-ium	acetate	0.95416	-12.4007
C0033	A0089	3-hydroxy-1-methylpyridin-1-ium	2-chloroacetate	0.788103	-7.96928
C0033	A0090	3-hydroxy-1-methylpyridin-1-ium	nitrooxidane	0.530479	-2.07988
C0033	A0091	3-hydroxy-1-methylpyridin-1-ium	diethyl phosphate	0.811904	-8.97961
C0033	A0092	3-hydroxy-1-methylpyridin-1-ium	dibutyl phosphate	0.856958	-9.05291
C0033	A0093	3-hydroxy-1-methylpyridin-1-ium	sulfamate	0.708168	-4.06893
C0033	A0094	3-hydroxy-1-methylpyridin-1-ium	pyridine-4-carboxylate	0.771724	-6.81829
C0033	A0095	3-hydroxy-1-methylpyridin-1-ium	pyridine-3-carboxylate	0.791003	-7.21143
C0033	A0097	3-hydroxy-1-methylpyridin-1-ium	O-(difluorophosphoryl)oxidanidolate	0.427925	-1.88144
C0033	A0103	3-hydroxy-1-methylpyridin-1-ium	ethanesulfonate	0.706743	-5.12493
C0033	A0104	3-hydroxy-1-methylpyridin-1-ium	propane-1-sulfonate	0.709932	-5.09196
C0033	A0105	3-hydroxy-1-methylpyridin-1-ium	butane-1-sulfonate	0.719437	-5.15185
C0033	A0106	3-hydroxy-1-methylpyridin-1-ium	hexane-1-sulfonate	0.738826	-5.22356
C0033	A0107	3-hydroxy-1-methylpyridin-1-ium	hydrogen oxalate	0.604459	-1.06165
C0033	A0120	3-hydroxy-1-methylpyridin-1-ium	2-hydroxyacetate	0.69293	-7.04142
C0033	A0121	3-hydroxy-1-methylpyridin-1-ium	(2R)-2-hydroxypropanoate	0.668649	-6.77305
C0033	A0123	3-hydroxy-1-methylpyridin-1-ium	bis[(2R)-2,4,4-trimethylpentyl]phosphinate	0.759858	-12.0594
C0033	A0136	3-hydroxy-1-methylpyridin-1-ium	cyclohexanecarboxylate	0.893133	-11.5008
C0033	A0137	3-hydroxy-1-methylpyridin-1-ium	2-cyclopentylacetate	0.901553	-11.4589
C0033	A0138	3-hydroxy-1-methylpyridin-1-ium	cyclopentanecarboxylate	0.890146	-11.3221
C0033	A0145	3-hydroxy-1-methylpyridin-1-ium	2-hydroxybenzoate	0.565839	-2.82699
C0033	A0152	3-hydroxy-1-methylpyridin-1-ium	benzenolate	0.740341	-8.27173
C0033	A0153	3-hydroxy-1-methylpyridin-1-ium	4-methylbenzen-1-olate	0.780496	-9.33376
C0033	A0154	3-hydroxy-1-methylpyridin-1-ium	4-methoxybenzen-1-olate	0.779492	-8.96415
C0033	A0155	3-hydroxy-1-methylpyridin-1-ium	4-fluorobenzen-1-olate	0.677858	-8.0767
C0033	A0157	3-hydroxy-1-methylpyridin-1-ium	butanoate	0.923643	-11.6124
C0033	A0158	3-hydroxy-1-methylpyridin-1-ium	hexanoate	0.939262	-11.6319
C0033	A0161	3-hydroxy-1-methylpyridin-1-ium	2,2-dimethylpropanoate	0.840371	-10.9136
C0033	A0163	3-hydroxy-1-methylpyridin-1-ium	ethanethioate	0.728235	-3.22055
C0033	A0173	3-hydroxy-1-methylpyridin-1-ium	(2E)-but-2-enoate	0.932574	-10.7638
C0033	A0175	3-hydroxy-1-methylpyridin-1-ium	2-methylbenzene-1-sulfonate	0.626274	-2.50768
C0033	A0179	3-hydroxy-1-methylpyridin-1-ium	1H-1,3-benzodiazol-1-ide	0.636731	-4.68448
C0033	A0189	3-hydroxy-1-methylpyridin-1-ium	dimethyl phosphate	0.856353	-8.92292
C0033	A0194	3-hydroxy-1-methylpyridin-1-ium	2-methylpropanoate	0.887622	-11.2928
C0033	A0195	3-hydroxy-1-methylpyridin-1-ium	4-oxopentanoate	0.953255	-10.7192
C0033	A0197	3-hydroxy-1-methylpyridin-1-ium	methyl phosphonate	0.825583	-9.82806
C0033	A0199	3-hydroxy-1-methylpyridin-1-ium	propanoate	0.920131	-11.8031
C0033	A0202	3-hydroxy-1-methylpyridin-1-ium	2-aminoethane-1-sulfonate	0.77966	-5.53301
C0033	A0205	3-hydroxy-1-methylpyridin-1-ium	1H-1,2,3-triazol-1-ide	0.768306	-7.74089
C0033	A0206	3-hydroxy-1-methylpyridin-1-ium	1H-1,2,3,4-tetrazol-5-ide	0.819845	-6.95275
C0033	A0208	3-hydroxy-1-methylpyridin-1-ium	2-fluorobenzen-1-olate	0.645269	-6.59517
C0033	A0210	3-hydroxy-1-methylpyridin-1-ium	2,2,2-trifluoroethan-1-olate	0.800794	-15.2742
C0033	A0212	3-hydroxy-1-methylpyridin-1-ium	2-oxopyrrolidin-1-ide	1.00707	-14.7927
C0033	A0235	3-hydroxy-1-methylpyridin-1-ium	4-chlorobenzen-1-olate	0.694383	-7.07394
C0033	A0237	3-hydroxy-1-methylpyridin-1-ium	3-chlorobenzen-1-olate	0.668407	-6.27205
C0033	A0239	3-hydroxy-1-methylpyridin-1-ium	2,4-dichlorobenzen-1-olate	0.664088	-5.27162
C0033	A0240	3-hydroxy-1-methylpyridin-1-ium	2,4,6-trichlorobenzen-1-olate	0.660638	-3.46567
C0033	A0241	3-hydroxy-1-methylpyridin-1-ium	3-methylbenzen-1-olate	0.772663	-8.97723
C0033	A0242	3-hydroxy-1-methylpyridin-1-ium	2-methylbenzen-1-olate	0.702772	-7.66835
C0033	A0243	3-hydroxy-1-methylpyridin-1-ium	2,4-dimethylbenzen-1-olate	0.747198	-8.89581
C0033	A0257	3-hydroxy-1-methylpyridin-1-ium	1H-pyrazol-1-ide	0.815661	-9.54456
C0033	A0269	3-hydroxy-1-methylpyridin-1-ium	2-carboxyacetate	0.780601	-4.7887
C0033	A0270	3-hydroxy-1-methylpyridin-1-ium	benzenesulfonate	0.656698	-2.3532
C0033	A0272	3-hydroxy-1-methylpyridin-1-ium	fluoranesulfonate	0.308057	2.48381
C0033	A0273	3-hydroxy-1-methylpyridin-1-ium	2-methoxyacetate	0.940839	-10.7266
C0033	A0278	3-hydroxy-1-methylpyridin-1-ium	hexyl sulfate	0.655918	-2.4047
C0033	A0279	3-hydroxy-1-methylpyridin-1-ium	ethyl phosphonite	0.855534	-10.5566
C0033	A0280	3-hydroxy-1-methylpyridin-1-ium	butyl phosphonite	0.876353	-10.5582
C0033	A0281	3-hydroxy-1-methylpyridin-1-ium	hexyl phosphonite	0.899591	-10.5683
C0033	A0295	3-hydroxy-1-methylpyridin-1-ium	1H-1,2,4-triazol-1-ide	0.759979	-8.31599
C0033	A0296	3-hydroxy-1-methylpyridin-1-ium	1H-1,2,3,4-tetrazol-1-ide	0.647835	-4.29107
C0033	A0307	3-hydroxy-1-methylpyridin-1-ium	(1r,4r)-4-fluorocyclohexan-1-olate	1.12141	-21.4098
C0033	A0317	3-hydroxy-1-methylpyridin-1-ium	pyridin-3-olate	0.700846	-7.4082
C0033	A0320	3-hydroxy-1-methylpyridin-1-ium	hydrogen phosphonate	0.881441	-8.55234
C0033	A0391	3-hydroxy-1-methylpyridin-1-ium	4-methyl-1H-imidazol-1-ide	0.744437	-8.16134
C0033	A0412	3-hydroxy-1-methylpyridin-1-ium	hydrogen ethylphosphonate	0.928067	-10.0949
C0033	A0419	3-hydroxy-1-methylpyridin-1-ium	ethyl phosphonate	0.841279	-9.56132
C0033	A0420	3-hydroxy-1-methylpyridin-1-ium	butyl phosphonate	0.851562	-9.46332
C0033	A0457	3-hydroxy-1-methylpyridin-1-ium	hydrogen methylphosphonate	0.975072	-10.637
C0039	A0012	(3R)-N,N,N-trimethyloxolan-3-aminium	dihydrogen phosphate	0.989461	-12.1013
C0039	A0017	(3R)-N,N,N-trimethyloxolan-3-aminium	hydrogen sulfate	0.62058	-4.56292
C0039	A0024	(3R)-N,N,N-trimethyloxolan-3-aminium	formate	0.95656	-18.2328
C0039	A0030	(3R)-N,N,N-trimethyloxolan-3-aminium	4-methylbenzene-1-sulfonate	0.708142	-5.6519
C0039	A0031	(3R)-N,N,N-trimethyloxolan-3-aminium	benzoate	0.832205	-15.2719
C0039	A0033	(3R)-N,N,N-trimethyloxolan-3-aminium	chloride	1.21155	-17.0854
C0039	A0039	(3R)-N,N,N-trimethyloxolan-3-aminium	(2E)-3-carboxyprop-2-enoate	0.735512	-8.2291
C0039	A0044	(3R)-N,N,N-trimethyloxolan-3-aminium	methyl sulfate	0.629443	-5.04607
C0039	A0047	(3R)-N,N,N-trimethyloxolan-3-aminium	(2E)-but-2-enoate	0.974612	-18.1875
C0039	A0050	(3R)-N,N,N-trimethyloxolan-3-aminium	butyl sulfate	0.660395	-4.24271
C0039	A0051	(3R)-N,N,N-trimethyloxolan-3-aminium	perchlorate	0.285596	1.98501
C0039	A0054	(3R)-N,N,N-trimethyloxolan-3-aminium	methanesulfonate	0.805412	-9.43245
C0039	A0062	(3R)-N,N,N-trimethyloxolan-3-aminium	nitrite	0.79845	-14.1852
C0039	A0063	(3R)-N,N,N-trimethyloxolan-3-aminium	dinitroazanide	0.247242	1.21855
C0039	A0064	(3R)-N,N,N-trimethyloxolan-3-aminium	trifluoroacetate	0.448527	-7.59279
C0039	A0070	(3R)-N,N,N-trimethyloxolan-3-aminium	hydrogen carbonate	0.929853	-14.6909
C0039	A0077	(3R)-N,N,N-trimethyloxolan-3-aminium	pentyl sulfate	0.672277	-4.12242
C0039	A0081	(3R)-N,N,N-trimethyloxolan-3-aminium	(2S)-2-hydroxypropanoate	0.7071	-12.5051
C0039	A0083	(3R)-N,N,N-trimethyloxolan-3-aminium	ethyl sulfate	0.646789	-4.78549
C0039	A0084	(3R)-N,N,N-trimethyloxolan-3-aminium	trifluoromethanesulfonate	0.288382	-0.21755
C0039	A0087	(3R)-N,N,N-trimethyloxolan-3-aminium	acetate	1.0117	-20.2207
C0039	A0089	(3R)-N,N,N-trimethyloxolan-3-aminium	2-chloroacetate	0.831204	-14.4154
C0039	A0090	(3R)-N,N,N-trimethyloxolan-3-aminium	nitrooxidane	0.596773	-8.16885
C0039	A0091	(3R)-N,N,N-trimethyloxolan-3-aminium	diethyl phosphate	0.853037	-12.5463
C0039	A0092	(3R)-N,N,N-trimethyloxolan-3-aminium	dibutyl phosphate	0.896315	-12.048
C0039	A0093	(3R)-N,N,N-trimethyloxolan-3-aminium	sulfamate	0.779693	-8.98246
C0039	A0094	(3R)-N,N,N-trimethyloxolan-3-aminium	pyridine-4-carboxylate	0.777467	-13.4575
C0039	A0095	(3R)-N,N,N-trimethyloxolan-3-aminium	pyridine-3-carboxylate	0.799032	-14.0515
C0039	A0097	(3R)-N,N,N-trimethyloxolan-3-aminium	O-(difluorophosphoryl)oxidanidolate	0.459498	-6.37801
C0039	A0103	(3R)-N,N,N-trimethyloxolan-3-aminium	ethanesulfonate	0.769286	-8.70873
C0039	A0104	(3R)-N,N,N-trimethyloxolan-3-aminium	propane-1-sulfonate	0.765418	-8.16211
C0039	A0105	(3R)-N,N,N-trimethyloxolan-3-aminium	butane-1-sulfonate	0.770411	-7.8668
C0039	A0106	(3R)-N,N,N-trimethyloxolan-3-aminium	hexane-1-sulfonate	0.785168	-7.503
C0039	A0107	(3R)-N,N,N-trimethyloxolan-3-aminium	hydrogen oxalate	0.664859	-6.92208
C0039	A0120	(3R)-N,N,N-trimethyloxolan-3-aminium	2-hydroxyacetate	0.744225	-13.1721
C0039	A0121	(3R)-N,N,N-trimethyloxolan-3-aminium	(2R)-2-hydroxypropanoate	0.706286	-12.4151
C0039	A0123	(3R)-N,N,N-trimethyloxolan-3-aminium	bis[(2R)-2,4,4-trimethylpentyl]phosphinate	0.771083	-16.464
C0039	A0136	(3R)-N,N,N-trimethyloxolan-3-aminium	cyclohexanecarboxylate	0.925527	-18.2218
C0039	A0137	(3R)-N,N,N-trimethyloxolan-3-aminium	2-cyclopentylacetate	0.933706	-18.0342
C0039	A0138	(3R)-N,N,N-trimethyloxolan-3-aminium	cyclopentanecarboxylate	0.921578	-18.1446
C0039	A0145	(3R)-N,N,N-trimethyloxolan-3-aminium	2-hydroxybenzoate	0.548188	-8.08891
C0039	A0152	(3R)-N,N,N-trimethyloxolan-3-aminium	benzenolate	0.728317	-14.9741
C0039	A0153	(3R)-N,N,N-trimethyloxolan-3-aminium	4-methylbenzen-1-olate	0.763996	-15.7082
C0039	A0154	(3R)-N,N,N-trimethyloxolan-3-aminium	4-methoxybenzen-1-olate	0.767885	-15.2728
C0039	A0155	(3R)-N,N,N-trimethyloxolan-3-aminium	4-fluorobenzen-1-olate	0.650796	-14.5961
C0039	A0157	(3R)-N,N,N-trimethyloxolan-3-aminium	butanoate	0.961438	-18.7579
C0039	A0158	(3R)-N,N,N-trimethyloxolan-3-aminium	hexanoate	0.97272	-18.1577
C0039	A0161	(3R)-N,N,N-trimethyloxolan-3-aminium	2,2-dimethylpropanoate	0.863261	-18.0217
C0039	A0163	(3R)-N,N,N-trimethyloxolan-3-aminium	ethanethioate	0.765497	-8.8358
C0039	A0173	(3R)-N,N,N-trimethyloxolan-3-aminium	(2E)-but-2-enoate	0.973043	-18.1637
C0039	A0175	(3R)-N,N,N-trimethyloxolan-3-aminium	2-methylbenzene-1-sulfonate	0.636925	-5.28597
C0039	A0179	(3R)-N,N,N-trimethyloxolan-3-aminium	1H-1,3-benzodiazol-1-ide	0.586382	-12.5665
C0039	A0189	(3R)-N,N,N-trimethyloxolan-3-aminium	dimethyl phosphate	0.919356	-13.0227
C0039	A0194	(3R)-N,N,N-trimethyloxolan-3-aminium	2-methylpropanoate	0.922915	-18.4319
C0039	A0195	(3R)-N,N,N-trimethyloxolan-3-aminium	4-oxopentanoate	1.00287	-17.556
C0039	A0197	(3R)-N,N,N-trimethyloxolan-3-aminium	methyl phosphonate	0.888913	-14.324
C0039	A0199	(3R)-N,N,N-trimethyloxolan-3-aminium	propanoate	0.96427	-19.2104
C0039	A0202	(3R)-N,N,N-trimethyloxolan-3-aminium	2-aminoethane-1-sulfonate	0.829374	-10.1182
C0039	A0205	(3R)-N,N,N-trimethyloxolan-3-aminium	1H-1,2,3-triazol-1-ide	0.793334	-14.8093
C0039	A0206	(3R)-N,N,N-trimethyloxolan-3-aminium	1H-1,2,3,4-tetrazol-5-ide	0.840819	-16.8516
C0039	A0208	(3R)-N,N,N-trimethyloxolan-3-aminium	2-fluorobenzen-1-olate	0.62109	-12.8106
C0039	A0210	(3R)-N,N,N-trimethyloxolan-3-aminium	2,2,2-trifluoroethan-1-olate	0.786459	-22.9331
C0039	A0212	(3R)-N,N,N-trimethyloxolan-3-aminium	2-oxopyrrolidin-1-ide	1.03917	-21.9384
C0039	A0235	(3R)-N,N,N-trimethyloxolan-3-aminium	4-chlorobenzen-1-olate	0.654544	-13.0826
C0039	A0237	(3R)-N,N,N-trimethyloxolan-3-aminium	3-chlorobenzen-1-olate	0.625261	-12.1034
C0039	A0239	(3R)-N,N,N-trimethyloxolan-3-aminium	2,4-dichlorobenzen-1-olate	0.597672	-10.7192
C0039	A0240	(3R)-N,N,N-trimethyloxolan-3-aminium	2,4,6-trichlorobenzen-1-olate	0.576322	-8.10252
C0039	A0241	(3R)-N,N,N-trimethyloxolan-3-aminium	3-methylbenzen-1-olate	0.757469	-15.3339
C0039	A0242	(3R)-N,N,N-trimethyloxolan-3-aminium	2-methylbenzen-1-olate	0.671797	-14.0493
C0039	A0243	(3R)-N,N,N-trimethyloxolan-3-aminium	2,4-dimethylbenzen-1-olate	0.714177	-15.1158
C0039	A0257	(3R)-N,N,N-trimethyloxolan-3-aminium	1H-pyrazol-1-ide	0.837469	-17.7017
C0039	A0269	(3R)-N,N,N-trimethyloxolan-3-aminium	2-carboxyacetate	0.838385	-10.6552
C0039	A0270	(3R)-N,N,N-trimethyloxolan-3-aminium	benzenesulfonate	0.679634	-5.39981
C0039	A0272	(3R)-N,N,N-trimethyloxolan-3-aminium	fluoranesulfonate	0.341468	-0.13164
C0039	A0273	(3R)-N,N,N-trimethyloxolan-3-aminium	2-methoxyacetate	1.00006	-16.8951
C0039	A0278	(3R)-N,N,N-trimethyloxolan-3-aminium	hexyl sulfate	0.686512	-4.0199
C0039	A0279	(3R)-N,N,N-trimethyloxolan-3-aminium	ethyl phosphonite	0.893823	-16.0251
C0039	A0280	(3R)-N,N,N-trimethyloxolan-3-aminium	butyl phosphonite	0.903854	-15.2753
C0039	A0281	(3R)-N,N,N-trimethyloxolan-3-aminium	hexyl phosphonite	0.923359	-14.9382
C0039	A0295	(3R)-N,N,N-trimethyloxolan-3-aminium	1H-1,2,4-triazol-1-ide	0.778411	-15.6514
C0039	A0296	(3R)-N,N,N-trimethyloxolan-3-aminium	1H-1,2,3,4-tetrazol-1-ide	0.663443	-11.1262
C0039	A0307	(3R)-N,N,N-trimethyloxolan-3-aminium	(1r,4r)-4-fluorocyclohexan-1-olate	1.11448	-29.2367
C0039	A0317	(3R)-N,N,N-trimethyloxolan-3-aminium	pyridin-3-olate	0.688915	-13.4706
C0039	A0320	(3R)-N,N,N-trimethyloxolan-3-aminium	hydrogen phosphonate	0.964373	-13.8731
C0039	A0391	(3R)-N,N,N-trimethyloxolan-3-aminium	4-methyl-1H-imidazol-1-ide	0.730588	-16.4665
C0039	A0412	(3R)-N,N,N-trimethyloxolan-3-aminium	hydrogen ethylphosphonate	0.989852	-14.5975
C0039	A0419	(3R)-N,N,N-trimethyloxolan-3-aminium	ethyl phosphonate	0.901082	-13.4958
C0039	A0420	(3R)-N,N,N-trimethyloxolan-3-aminium	butyl phosphonate	0.901992	-12.7346
C0039	A0457	(3R)-N,N,N-trimethyloxolan-3-aminium	hydrogen methylphosphonate	1.04901	-15.5499
C0052	A0012	2,3-dimethyl-1-propyl-1H-imidazol-3-ium	dihydrogen phosphate	1.07445	-12.2426
C0052	A0017	2,3-dimethyl-1-propyl-1H-imidazol-3-ium	hydrogen sulfate	0.743023	-4.90817
C0052	A0024	2,3-dimethyl-1-propyl-1H-imidazol-3-ium	formate	1.05294	-19.0857
C0052	A0030	2,3-dimethyl-1-propyl-1H-imidazol-3-ium	4-methylbenzene-1-sulfonate	0.857153	-6.99045
C0052	A0031	2,3-dimethyl-1-propyl-1H-imidazol-3-ium	benzoate	0.975542	-18.2213
C0052	A0033	2,3-dimethyl-1-propyl-1H-imidazol-3-ium	chloride	1.2776	-15.7958
C0052	A0039	2,3-dimethyl-1-propyl-1H-imidazol-3-ium	(2E)-3-carboxyprop-2-enoate	0.87222	-10.0602
C0052	A0044	2,3-dimethyl-1-propyl-1H-imidazol-3-ium	methyl sulfate	0.769406	-5.95685
C0052	A0047	2,3-dimethyl-1-propyl-1H-imidazol-3-ium	(2E)-but-2-enoate	1.10502	-21.0513
C0052	A0050	2,3-dimethyl-1-propyl-1H-imidazol-3-ium	butyl sulfate	0.804194	-5.46206
C0052	A0051	2,3-dimethyl-1-propyl-1H-imidazol-3-ium	perchlorate	0.442585	1.36729
C0052	A0054	2,3-dimethyl-1-propyl-1H-imidazol-3-ium	methanesulfonate	0.932221	-10.2852
C0052	A0062	2,3-dimethyl-1-propyl-1H-imidazol-3-ium	nitrite	0.895216	-14.2383
C0052	A0063	2,3-dimethyl-1-propyl-1H-imidazol-3-ium	dinitroazanide	0.41379	0.09302
C0052	A0064	2,3-dimethyl-1-propyl-1H-imidazol-3-ium	trifluoroacetate	0.592132	-9.7995
C0052	A0070	2,3-dimethyl-1-propyl-1H-imidazol-3-ium	hydrogen carbonate	1.02109	-14.9052
C0052	A0077	2,3-dimethyl-1-propyl-1H-imidazol-3-ium	pentyl sulfate	0.812894	-5.28669
C0052	A0081	2,3-dimethyl-1-propyl-1H-imidazol-3-ium	(2S)-2-hydroxypropanoate	0.840817	-14.8596
C0052	A0083	2,3-dimethyl-1-propyl-1H-imidazol-3-ium	ethyl sulfate	0.791901	-5.95175
C0052	A0084	2,3-dimethyl-1-propyl-1H-imidazol-3-ium	trifluoromethanesulfonate	0.435812	-1.39109
C0052	A0087	2,3-dimethyl-1-propyl-1H-imidazol-3-ium	acetate	1.12225	-22.4712
C0052	A0089	2,3-dimethyl-1-propyl-1H-imidazol-3-ium	2-chloroacetate	0.961789	-16.7003
C0052	A0090	2,3-dimethyl-1-propyl-1H-imidazol-3-ium	nitrooxidane	0.714605	-8.61711
C0052	A0091	2,3-dimethyl-1-propyl-1H-imidazol-3-ium	diethyl phosphate	0.99133	-14.9202
C0052	A0092	2,3-dimethyl-1-propyl-1H-imidazol-3-ium	dibutyl phosphate	1.02569	-14.3678
C0052	A0093	2,3-dimethyl-1-propyl-1H-imidazol-3-ium	sulfamate	0.88329	-8.84027
C0052	A0094	2,3-dimethyl-1-propyl-1H-imidazol-3-ium	pyridine-4-carboxylate	0.923281	-16.0667
C0052	A0095	2,3-dimethyl-1-propyl-1H-imidazol-3-ium	pyridine-3-carboxylate	0.944483	-16.6992
C0052	A0097	2,3-dimethyl-1-propyl-1H-imidazol-3-ium	O-(difluorophosphoryl)oxidanidolate	0.602758	-8.11608
C0052	A0103	2,3-dimethyl-1-propyl-1H-imidazol-3-ium	ethanesulfonate	0.905924	-10.086
C0052	A0104	2,3-dimethyl-1-propyl-1H-imidazol-3-ium	propane-1-sulfonate	0.906191	-9.73958
C0052	A0105	2,3-dimethyl-1-propyl-1H-imidazol-3-ium	butane-1-sulfonate	0.911902	-9.51337
C0052	A0106	2,3-dimethyl-1-propyl-1H-imidazol-3-ium	hexane-1-sulfonate	0.923761	-9.13428
C0052	A0107	2,3-dimethyl-1-propyl-1H-imidazol-3-ium	hydrogen oxalate	0.791099	-7.97163
C0052	A0120	2,3-dimethyl-1-propyl-1H-imidazol-3-ium	2-hydroxyacetate	0.871776	-15.0626
C0052	A0121	2,3-dimethyl-1-propyl-1H-imidazol-3-ium	(2R)-2-hydroxypropanoate	0.840117	-14.7589
C0052	A0123	2,3-dimethyl-1-propyl-1H-imidazol-3-ium	bis[(2R)-2,4,4-trimethylpentyl]phosphinate	0.84647	-19.4248
C0052	A0136	2,3-dimethyl-1-propyl-1H-imidazol-3-ium	cyclohexanecarboxylate	1.04481	-21.5953
C0052	A0137	2,3-dimethyl-1-propyl-1H-imidazol-3-ium	2-cyclopentylacetate	1.05355	-21.4077
C0052	A0138	2,3-dimethyl-1-propyl-1H-imidazol-3-ium	cyclopentanecarboxylate	1.04314	-21.4708
C0052	A0145	2,3-dimethyl-1-propyl-1H-imidazol-3-ium	2-hydroxybenzoate	0.695778	-10.3126
C0052	A0152	2,3-dimethyl-1-propyl-1H-imidazol-3-ium	benzenolate	0.871429	-18.0361
C0052	A0153	2,3-dimethyl-1-propyl-1H-imidazol-3-ium	4-methylbenzen-1-olate	0.899603	-18.878
C0052	A0154	2,3-dimethyl-1-propyl-1H-imidazol-3-ium	4-methoxybenzen-1-olate	0.908933	-18.3729
C0052	A0155	2,3-dimethyl-1-propyl-1H-imidazol-3-ium	4-fluorobenzen-1-olate	0.794518	-17.7349
C0052	A0157	2,3-dimethyl-1-propyl-1H-imidazol-3-ium	butanoate	1.08392	-21.9202
C0052	A0158	2,3-dimethyl-1-propyl-1H-imidazol-3-ium	hexanoate	1.09397	-21.505
C0052	A0161	2,3-dimethyl-1-propyl-1H-imidazol-3-ium	2,2-dimethylpropanoate	0.983686	-21.3624
C0052	A0163	2,3-dimethyl-1-propyl-1H-imidazol-3-ium	ethanethioate	0.907823	-10.3517
C0052	A0173	2,3-dimethyl-1-propyl-1H-imidazol-3-ium	(2E)-but-2-enoate	1.10337	-21.0212
C0052	A0175	2,3-dimethyl-1-propyl-1H-imidazol-3-ium	2-methylbenzene-1-sulfonate	0.783862	-6.66893
C0052	A0179	2,3-dimethyl-1-propyl-1H-imidazol-3-ium	1H-1,3-benzodiazol-1-ide	0.744095	-15.3711
C0052	A0189	2,3-dimethyl-1-propyl-1H-imidazol-3-ium	dimethyl phosphate	1.05644	-14.9672
C0052	A0194	2,3-dimethyl-1-propyl-1H-imidazol-3-ium	2-methylpropanoate	1.04492	-21.5785
C0052	A0195	2,3-dimethyl-1-propyl-1H-imidazol-3-ium	4-oxopentanoate	1.14247	-20.4336
C0052	A0197	2,3-dimethyl-1-propyl-1H-imidazol-3-ium	methyl phosphonate	1.01458	-16.2516
C0052	A0199	2,3-dimethyl-1-propyl-1H-imidazol-3-ium	propanoate	1.0839	-22.0807
C0052	A0202	2,3-dimethyl-1-propyl-1H-imidazol-3-ium	2-aminoethane-1-sulfonate	0.958921	-11.261
C0052	A0205	2,3-dimethyl-1-propyl-1H-imidazol-3-ium	1H-1,2,3-triazol-1-ide	0.930553	-16.3827
C0052	A0206	2,3-dimethyl-1-propyl-1H-imidazol-3-ium	1H-1,2,3,4-tetrazol-5-ide	0.951117	-17.7041
C0052	A0208	2,3-dimethyl-1-propyl-1H-imidazol-3-ium	2-fluorobenzen-1-olate	0.767126	-15.7182
C0052	A0210	2,3-dimethyl-1-propyl-1H-imidazol-3-ium	2,2,2-trifluoroethan-1-olate	0.910832	-27.024
C0052	A0212	2,3-dimethyl-1-propyl-1H-imidazol-3-ium	2-oxopyrrolidin-1-ide	1.16041	-25.2141
C0052	A0235	2,3-dimethyl-1-propyl-1H-imidazol-3-ium	4-chlorobenzen-1-olate	0.7938	-16.0373
C0052	A0237	2,3-dimethyl-1-propyl-1H-imidazol-3-ium	3-chlorobenzen-1-olate	0.764821	-14.9331
C0052	A0239	2,3-dimethyl-1-propyl-1H-imidazol-3-ium	2,4-dichlorobenzen-1-olate	0.723625	-13.2128
C0052	A0240	2,3-dimethyl-1-propyl-1H-imidazol-3-ium	2,4,6-trichlorobenzen-1-olate	0.678692	-9.8634
C0052	A0241	2,3-dimethyl-1-propyl-1H-imidazol-3-ium	3-methylbenzen-1-olate	0.89466	-18.4543
C0052	A0242	2,3-dimethyl-1-propyl-1H-imidazol-3-ium	2-methylbenzen-1-olate	0.809634	-17.1122
C0052	A0243	2,3-dimethyl-1-propyl-1H-imidazol-3-ium	2,4-dimethylbenzen-1-olate	0.841073	-18.2228
C0052	A0257	2,3-dimethyl-1-propyl-1H-imidazol-3-ium	1H-pyrazol-1-ide	0.974714	-20.1071
C0052	A0269	2,3-dimethyl-1-propyl-1H-imidazol-3-ium	2-carboxyacetate	0.962196	-12.2087
C0052	A0270	2,3-dimethyl-1-propyl-1H-imidazol-3-ium	benzenesulfonate	0.830474	-6.72589
C0052	A0272	2,3-dimethyl-1-propyl-1H-imidazol-3-ium	fluoranesulfonate	0.496531	-1.10489
C0052	A0273	2,3-dimethyl-1-propyl-1H-imidazol-3-ium	2-methoxyacetate	1.12905	-19.2799
C0052	A0278	2,3-dimethyl-1-propyl-1H-imidazol-3-ium	hexyl sulfate	0.823252	-5.11104
C0052	A0279	2,3-dimethyl-1-propyl-1H-imidazol-3-ium	ethyl phosphonite	1.02045	-18.8105
C0052	A0280	2,3-dimethyl-1-propyl-1H-imidazol-3-ium	butyl phosphonite	1.0293	-18.2191
C0052	A0281	2,3-dimethyl-1-propyl-1H-imidazol-3-ium	hexyl phosphonite	1.04243	-17.8524
C0052	A0295	2,3-dimethyl-1-propyl-1H-imidazol-3-ium	1H-1,2,4-triazol-1-ide	0.916193	-17.4145
C0052	A0296	2,3-dimethyl-1-propyl-1H-imidazol-3-ium	1H-1,2,3,4-tetrazol-1-ide	0.802116	-12.0663
C0052	A0307	2,3-dimethyl-1-propyl-1H-imidazol-3-ium	(1r,4r)-4-fluorocyclohexan-1-olate	1.22302	-34.2185
C0052	A0317	2,3-dimethyl-1-propyl-1H-imidazol-3-ium	pyridin-3-olate	0.835992	-16.1441
C0052	A0320	2,3-dimethyl-1-propyl-1H-imidazol-3-ium	hydrogen phosphonate	1.05971	-14.6408
C0052	A0391	2,3-dimethyl-1-propyl-1H-imidazol-3-ium	4-methyl-1H-imidazol-1-ide	0.875702	-19.4662
C0052	A0412	2,3-dimethyl-1-propyl-1H-imidazol-3-ium	hydrogen ethylphosphonate	1.10599	-16.5861
C0052	A0419	2,3-dimethyl-1-propyl-1H-imidazol-3-ium	ethyl phosphonate	1.03175	-15.6292
C0052	A0420	2,3-dimethyl-1-propyl-1H-imidazol-3-ium	butyl phosphonate	1.0341	-15.0882
C0052	A0457	2,3-dimethyl-1-propyl-1H-imidazol-3-ium	hydrogen methylphosphonate	1.15611	-17.0444
C0053	A0012	1-butyl-3-carboxypyridin-1-ium	dihydrogen phosphate	0.897248	-5.70783
C0053	A0017	1-butyl-3-carboxypyridin-1-ium	hydrogen sulfate	0.59104	-0.88203
C0053	A0024	1-butyl-3-carboxypyridin-1-ium	formate	0.875153	-10.0691
C0053	A0030	1-butyl-3-carboxypyridin-1-ium	4-methylbenzene-1-sulfonate	0.74035	-3.3964
C0053	A0031	1-butyl-3-carboxypyridin-1-ium	benzoate	0.867321	-8.48487
C0053	A0033	1-butyl-3-carboxypyridin-1-ium	chloride	1.02232	-8.54342
C0053	A0039	1-butyl-3-carboxypyridin-1-ium	(2E)-3-carboxyprop-2-enoate	0.754959	-4.03449
C0053	A0044	1-butyl-3-carboxypyridin-1-ium	methyl sulfate	0.627067	-2.15471
C0053	A0047	1-butyl-3-carboxypyridin-1-ium	(2E)-but-2-enoate	0.961644	-10.8086
C0053	A0050	1-butyl-3-carboxypyridin-1-ium	butyl sulfate	0.686651	-2.45813
C0053	A0051	1-butyl-3-carboxypyridin-1-ium	perchlorate	0.343754	0.35911
C0053	A0054	1-butyl-3-carboxypyridin-1-ium	methanesulfonate	0.760292	-5.20619
C0053	A0062	1-butyl-3-carboxypyridin-1-ium	nitrite	0.726897	-5.69058
C0053	A0063	1-butyl-3-carboxypyridin-1-ium	dinitroazanide	0.354737	0.86121
C0053	A0064	1-butyl-3-carboxypyridin-1-ium	trifluoroacetate	0.511067	-3.824
C0053	A0070	1-butyl-3-carboxypyridin-1-ium	hydrogen carbonate	0.840012	-7.43001
C0053	A0077	1-butyl-3-carboxypyridin-1-ium	pentyl sulfate	0.700777	-2.45099
C0053	A0081	1-butyl-3-carboxypyridin-1-ium	(2S)-2-hydroxypropanoate	0.715369	-7.1719
C0053	A0083	1-butyl-3-carboxypyridin-1-ium	ethyl sulfate	0.658211	-2.43418
C0053	A0084	1-butyl-3-carboxypyridin-1-ium	trifluoromethanesulfonate	0.376337	-0.0357
C0053	A0087	1-butyl-3-carboxypyridin-1-ium	acetate	0.959797	-11.8068
C0053	A0089	1-butyl-3-carboxypyridin-1-ium	2-chloroacetate	0.827381	-8.22623
C0053	A0090	1-butyl-3-carboxypyridin-1-ium	nitrooxidane	0.568673	-2.74647
C0053	A0091	1-butyl-3-carboxypyridin-1-ium	diethyl phosphate	0.857954	-9.07695
C0053	A0092	1-butyl-3-carboxypyridin-1-ium	dibutyl phosphate	0.905419	-9.00079
C0053	A0093	1-butyl-3-carboxypyridin-1-ium	sulfamate	0.722174	-3.70076
C0053	A0094	1-butyl-3-carboxypyridin-1-ium	pyridine-4-carboxylate	0.816682	-7.48678
C0053	A0095	1-butyl-3-carboxypyridin-1-ium	pyridine-3-carboxylate	0.834697	-7.86077
C0053	A0097	1-butyl-3-carboxypyridin-1-ium	O-(difluorophosphoryl)oxidanidolate	0.499726	-3.2328
C0053	A0103	1-butyl-3-carboxypyridin-1-ium	ethanesulfonate	0.748821	-5.33079
C0053	A0104	1-butyl-3-carboxypyridin-1-ium	propane-1-sulfonate	0.758555	-5.30055
C0053	A0105	1-butyl-3-carboxypyridin-1-ium	butane-1-sulfonate	0.771195	-5.31116
C0053	A0106	1-butyl-3-carboxypyridin-1-ium	hexane-1-sulfonate	0.79313	-5.27102
C0053	A0107	1-butyl-3-carboxypyridin-1-ium	hydrogen oxalate	0.651775	-2.26056
C0053	A0120	1-butyl-3-carboxypyridin-1-ium	2-hydroxyacetate	0.728208	-7.25392
C0053	A0121	1-butyl-3-carboxypyridin-1-ium	(2R)-2-hydroxypropanoate	0.713734	-7.11536
C0053	A0123	1-butyl-3-carboxypyridin-1-ium	bis[(2R)-2,4,4-trimethylpentyl]phosphinate	0.787732	-11.7096
C0053	A0136	1-butyl-3-carboxypyridin-1-ium	cyclohexanecarboxylate	0.92496	-11.4258
C0053	A0137	1-butyl-3-carboxypyridin-1-ium	2-cyclopentylacetate	0.934497	-11.3891
C0053	A0138	1-butyl-3-carboxypyridin-1-ium	cyclopentanecarboxylate	0.922151	-11.266
C0053	A0145	1-butyl-3-carboxypyridin-1-ium	2-hydroxybenzoate	0.627587	-3.62144
C0053	A0152	1-butyl-3-carboxypyridin-1-ium	benzenolate	0.799149	-8.50935
C0053	A0153	1-butyl-3-carboxypyridin-1-ium	4-methylbenzen-1-olate	0.834437	-9.31106
C0053	A0154	1-butyl-3-carboxypyridin-1-ium	4-methoxybenzen-1-olate	0.836273	-9.05195
C0053	A0155	1-butyl-3-carboxypyridin-1-ium	4-fluorobenzen-1-olate	0.742232	-8.3741
C0053	A0157	1-butyl-3-carboxypyridin-1-ium	butanoate	0.950389	-11.5274
C0053	A0158	1-butyl-3-carboxypyridin-1-ium	hexanoate	0.97115	-11.5857
C0053	A0161	1-butyl-3-carboxypyridin-1-ium	2,2-dimethylpropanoate	0.873179	-10.8677
C0053	A0163	1-butyl-3-carboxypyridin-1-ium	ethanethioate	0.775431	-3.71707
C0053	A0173	1-butyl-3-carboxypyridin-1-ium	(2E)-but-2-enoate	0.959921	-10.791
C0053	A0175	1-butyl-3-carboxypyridin-1-ium	2-methylbenzene-1-sulfonate	0.682749	-3.04611
C0053	A0179	1-butyl-3-carboxypyridin-1-ium	1H-1,3-benzodiazol-1-ide	0.705421	-5.30786
C0053	A0189	1-butyl-3-carboxypyridin-1-ium	dimethyl phosphate	0.891271	-8.95128
C0053	A0194	1-butyl-3-carboxypyridin-1-ium	2-methylpropanoate	0.915655	-11.2348
C0053	A0195	1-butyl-3-carboxypyridin-1-ium	4-oxopentanoate	0.988742	-10.7535
C0053	A0197	1-butyl-3-carboxypyridin-1-ium	methyl phosphonate	0.854693	-9.69687
C0053	A0199	1-butyl-3-carboxypyridin-1-ium	propanoate	0.940859	-11.6176
C0053	A0202	1-butyl-3-carboxypyridin-1-ium	2-aminoethane-1-sulfonate	0.815673	-5.45718
C0053	A0205	1-butyl-3-carboxypyridin-1-ium	1H-1,2,3-triazol-1-ide	0.798279	-7.55901
C0053	A0206	1-butyl-3-carboxypyridin-1-ium	1H-1,2,3,4-tetrazol-5-ide	0.836158	-6.47857
C0053	A0208	1-butyl-3-carboxypyridin-1-ium	2-fluorobenzen-1-olate	0.711296	-7.02658
C0053	A0210	1-butyl-3-carboxypyridin-1-ium	2,2,2-trifluoroethan-1-olate	0.856378	-14.9075
C0053	A0212	1-butyl-3-carboxypyridin-1-ium	2-oxopyrrolidin-1-ide	1.02862	-14.3402
C0053	A0235	1-butyl-3-carboxypyridin-1-ium	4-chlorobenzen-1-olate	0.755956	-7.28904
C0053	A0237	1-butyl-3-carboxypyridin-1-ium	3-chlorobenzen-1-olate	0.730379	-6.52282
C0053	A0239	1-butyl-3-carboxypyridin-1-ium	2,4-dichlorobenzen-1-olate	0.717375	-5.31664
C0053	A0240	1-butyl-3-carboxypyridin-1-ium	2,4,6-trichlorobenzen-1-olate	0.696029	-3.27986
C0053	A0241	1-butyl-3-carboxypyridin-1-ium	3-methylbenzen-1-olate	0.827549	-8.99829
C0053	A0242	1-butyl-3-carboxypyridin-1-ium	2-methylbenzen-1-olate	0.762533	-7.75871
C0053	A0243	1-butyl-3-carboxypyridin-1-ium	2,4-dimethylbenzen-1-olate	0.800061	-8.71005
C0053	A0257	1-butyl-3-carboxypyridin-1-ium	1H-pyrazol-1-ide	0.850924	-9.36899
C0053	A0269	1-butyl-3-carboxypyridin-1-ium	2-carboxyacetate	0.815891	-5.22443
C0053	A0270	1-butyl-3-carboxypyridin-1-ium	benzenesulfonate	0.713318	-3.03332
C0053	A0272	1-butyl-3-carboxypyridin-1-ium	fluoranesulfonate	0.400634	0.46175
C0053	A0273	1-butyl-3-carboxypyridin-1-ium	2-methoxyacetate	0.964385	-10.5644
C0053	A0278	1-butyl-3-carboxypyridin-1-ium	hexyl sulfate	0.715264	-2.42294
C0053	A0279	1-butyl-3-carboxypyridin-1-ium	ethyl phosphonite	0.898935	-10.4945
C0053	A0280	1-butyl-3-carboxypyridin-1-ium	butyl phosphonite	0.922818	-10.4078
C0053	A0281	1-butyl-3-carboxypyridin-1-ium	hexyl phosphonite	0.945668	-10.327
C0053	A0295	1-butyl-3-carboxypyridin-1-ium	1H-1,2,4-triazol-1-ide	0.793348	-8.1817
C0053	A0296	1-butyl-3-carboxypyridin-1-ium	1H-1,2,3,4-tetrazol-1-ide	0.684818	-4.52135
C0053	A0307	1-butyl-3-carboxypyridin-1-ium	(1r,4r)-4-fluorocyclohexan-1-olate	1.16365	-20.3496
C0053	A0317	1-butyl-3-carboxypyridin-1-ium	pyridin-3-olate	0.757541	-7.868
C0053	A0320	1-butyl-3-carboxypyridin-1-ium	hydrogen phosphonate	0.884944	-7.86844
C0053	A0391	1-butyl-3-carboxypyridin-1-ium	4-methyl-1H-imidazol-1-ide	0.795918	-8.41473
C0053	A0412	1-butyl-3-carboxypyridin-1-ium	hydrogen ethylphosphonate	0.94959	-9.87724
C0053	A0419	1-butyl-3-carboxypyridin-1-ium	ethyl phosphonate	0.875784	-9.51981
C0053	A0420	1-butyl-3-carboxypyridin-1-ium	butyl phosphonate	0.893423	-9.42828
C0053	A0457	1-butyl-3-carboxypyridin-1-ium	hydrogen methylphosphonate	0.982779	-10.0198
C0058	A0012	1-methyl-1H-1,2,4-triazol-1-ium	dihydrogen phosphate	0.601808	2.80451
C0058	A0017	1-methyl-1H-1,2,4-triazol-1-ium	hydrogen sulfate	0.360352	9.76736
C0058	A0024	1-methyl-1H-1,2,4-triazol-1-ium	formate	0.527136	-1.09967
C0058	A0030	1-methyl-1H-1,2,4-triazol-1-ium	4-methylbenzene-1-sulfonate	0.538404	-0.19135
C0058	A0031	1-methyl-1H-1,2,4-triazol-1-ium	benzoate	0.584521	-2.9938
C0058	A0033	1-methyl-1H-1,2,4-triazol-1-ium	chloride	0.702187	-3.90968
C0058	A0039	1-methyl-1H-1,2,4-triazol-1-ium	(2E)-3-carboxyprop-2-enoate	0.531511	2.11426
C0058	A0044	1-methyl-1H-1,2,4-triazol-1-ium	methyl sulfate	0.408308	3.86616
C0058	A0047	1-methyl-1H-1,2,4-triazol-1-ium	(2E)-but-2-enoate	0.614974	-4.52339
C0058	A0050	1-methyl-1H-1,2,4-triazol-1-ium	butyl sulfate	0.502287	0.07818
C0058	A0051	1-methyl-1H-1,2,4-triazol-1-ium	perchlorate	0.299901	3.20979
C0058	A0054	1-methyl-1H-1,2,4-triazol-1-ium	methanesulfonate	0.4748	1.40148
C0058	A0062	1-methyl-1H-1,2,4-triazol-1-ium	nitrite	0.403424	4.80572
C0058	A0063	1-methyl-1H-1,2,4-triazol-1-ium	dinitroazanide	0.353499	2.32102
C0058	A0064	1-methyl-1H-1,2,4-triazol-1-ium	trifluoroacetate	0.367274	0.08808
C0058	A0070	1-methyl-1H-1,2,4-triazol-1-ium	hydrogen carbonate	0.524049	1.53179
C0058	A0077	1-methyl-1H-1,2,4-triazol-1-ium	pentyl sulfate	0.523801	-0.40894
C0058	A0081	1-methyl-1H-1,2,4-triazol-1-ium	(2S)-2-hydroxypropanoate	0.439155	-1.43669
C0058	A0083	1-methyl-1H-1,2,4-triazol-1-ium	ethyl sulfate	0.450607	1.92572
C0058	A0084	1-methyl-1H-1,2,4-triazol-1-ium	trifluoromethanesulfonate	0.359654	1.29776
C0058	A0087	1-methyl-1H-1,2,4-triazol-1-ium	acetate	0.596862	-4.48718
C0058	A0089	1-methyl-1H-1,2,4-triazol-1-ium	2-chloroacetate	0.521189	-1.51671
C0058	A0090	1-methyl-1H-1,2,4-triazol-1-ium	nitrooxidane	0.304401	8.06844
C0058	A0091	1-methyl-1H-1,2,4-triazol-1-ium	diethyl phosphate	0.565735	-4.64007
C0058	A0092	1-methyl-1H-1,2,4-triazol-1-ium	dibutyl phosphate	0.624187	-5.54449
C0058	A0093	1-methyl-1H-1,2,4-triazol-1-ium	sulfamate	0.436567	4.63371
C0058	A0094	1-methyl-1H-1,2,4-triazol-1-ium	pyridine-4-carboxylate	0.542223	-1.98302
C0058	A0095	1-methyl-1H-1,2,4-triazol-1-ium	pyridine-3-carboxylate	0.550075	-2.17898
C0058	A0097	1-methyl-1H-1,2,4-triazol-1-ium	O-(difluorophosphoryl)oxidanidolate	0.33126	1.58586
C0058	A0103	1-methyl-1H-1,2,4-triazol-1-ium	ethanesulfonate	0.475376	-0.01808
C0058	A0104	1-methyl-1H-1,2,4-triazol-1-ium	propane-1-sulfonate	0.495022	-1.00729
C0058	A0105	1-methyl-1H-1,2,4-triazol-1-ium	butane-1-sulfonate	0.514714	-1.70663
C0058	A0106	1-methyl-1H-1,2,4-triazol-1-ium	hexane-1-sulfonate	0.547386	-2.53371
C0058	A0107	1-methyl-1H-1,2,4-triazol-1-ium	hydrogen oxalate	0.408283	7.27185
C0058	A0120	1-methyl-1H-1,2,4-triazol-1-ium	2-hydroxyacetate	0.429451	0.11605
C0058	A0121	1-methyl-1H-1,2,4-triazol-1-ium	(2R)-2-hydroxypropanoate	0.437587	-1.3767
C0058	A0123	1-methyl-1H-1,2,4-triazol-1-ium	bis[(2R)-2,4,4-trimethylpentyl]phosphinate	0.557079	-7.60842
C0058	A0136	1-methyl-1H-1,2,4-triazol-1-ium	cyclohexanecarboxylate	0.602016	-6.79641
C0058	A0137	1-methyl-1H-1,2,4-triazol-1-ium	2-cyclopentylacetate	0.61191	-6.82677
C0058	A0138	1-methyl-1H-1,2,4-triazol-1-ium	cyclopentanecarboxylate	0.60111	-6.42844
C0058	A0145	1-methyl-1H-1,2,4-triazol-1-ium	2-hydroxybenzoate	0.482847	-0.22637
C0058	A0152	1-methyl-1H-1,2,4-triazol-1-ium	benzenolate	0.538447	-2.52522
C0058	A0153	1-methyl-1H-1,2,4-triazol-1-ium	4-methylbenzen-1-olate	0.580729	-3.9656
C0058	A0154	1-methyl-1H-1,2,4-triazol-1-ium	4-methoxybenzen-1-olate	0.575095	-3.52345
C0058	A0155	1-methyl-1H-1,2,4-triazol-1-ium	4-fluorobenzen-1-olate	0.527981	-3.19367
C0058	A0157	1-methyl-1H-1,2,4-triazol-1-ium	butanoate	0.61351	-6.04424
C0058	A0158	1-methyl-1H-1,2,4-triazol-1-ium	hexanoate	0.642541	-6.92479
C0058	A0161	1-methyl-1H-1,2,4-triazol-1-ium	2,2-dimethylpropanoate	0.572659	-6.09928
C0058	A0163	1-methyl-1H-1,2,4-triazol-1-ium	ethanethioate	0.502383	2.5011
C0058	A0173	1-methyl-1H-1,2,4-triazol-1-ium	(2E)-but-2-enoate	0.613813	-4.52206
C0058	A0175	1-methyl-1H-1,2,4-triazol-1-ium	2-methylbenzene-1-sulfonate	0.50655	-0.00133
C0058	A0179	1-methyl-1H-1,2,4-triazol-1-ium	1H-1,3-benzodiazol-1-ide	0.4997	-1.02896
C0058	A0189	1-methyl-1H-1,2,4-triazol-1-ium	dimethyl phosphate	0.572093	-3.25282
C0058	A0194	1-methyl-1H-1,2,4-triazol-1-ium	2-methylpropanoate	0.589137	-5.79774
C0058	A0195	1-methyl-1H-1,2,4-triazol-1-ium	4-oxopentanoate	0.62802	-4.95869
C0058	A0197	1-methyl-1H-1,2,4-triazol-1-ium	methyl phosphonate	0.536395	-3.28781
C0058	A0199	1-methyl-1H-1,2,4-triazol-1-ium	propanoate	0.596502	-5.35509
C0058	A0202	1-methyl-1H-1,2,4-triazol-1-ium	2-aminoethane-1-sulfonate	0.515304	-0.31313
C0058	A0205	1-methyl-1H-1,2,4-triazol-1-ium	1H-1,2,3-triazol-1-ide	0.463417	0.5454
C0058	A0206	1-methyl-1H-1,2,4-triazol-1-ium	1H-1,2,3,4-tetrazol-5-ide	0.464525	3.17879
C0058	A0208	1-methyl-1H-1,2,4-triazol-1-ium	2-fluorobenzen-1-olate	0.503705	-2.08403
C0058	A0210	1-methyl-1H-1,2,4-triazol-1-ium	2,2,2-trifluoroethan-1-olate	0.586438	-7.78999
C0058	A0212	1-methyl-1H-1,2,4-triazol-1-ium	2-oxopyrrolidin-1-ide	0.670145	-7.94189
C0058	A0235	1-methyl-1H-1,2,4-triazol-1-ium	4-chlorobenzen-1-olate	0.592882	-3.31023
C0058	A0237	1-methyl-1H-1,2,4-triazol-1-ium	3-chlorobenzen-1-olate	0.584355	-2.98458
C0058	A0239	1-methyl-1H-1,2,4-triazol-1-ium	2,4-dichlorobenzen-1-olate	0.650118	-3.19362
C0058	A0240	1-methyl-1H-1,2,4-triazol-1-ium	2,4,6-trichlorobenzen-1-olate	0.7178	-2.84677
C0058	A0241	1-methyl-1H-1,2,4-triazol-1-ium	3-methylbenzen-1-olate	0.571489	-3.65668
C0058	A0242	1-methyl-1H-1,2,4-triazol-1-ium	2-methylbenzen-1-olate	0.54862	-3.1056
C0058	A0243	1-methyl-1H-1,2,4-triazol-1-ium	2,4-dimethylbenzen-1-olate	0.588007	-4.31248
C0058	A0257	1-methyl-1H-1,2,4-triazol-1-ium	1H-pyrazol-1-ide	0.505366	-1.3909
C0058	A0269	1-methyl-1H-1,2,4-triazol-1-ium	2-carboxyacetate	0.532942	2.1434
C0058	A0270	1-methyl-1H-1,2,4-triazol-1-ium	benzenesulfonate	0.514016	0.87519
C0058	A0272	1-methyl-1H-1,2,4-triazol-1-ium	fluoranesulfonate	0.313827	3.75981
C0058	A0273	1-methyl-1H-1,2,4-triazol-1-ium	2-methoxyacetate	0.608826	-4.3514
C0058	A0278	1-methyl-1H-1,2,4-triazol-1-ium	hexyl sulfate	0.543943	-0.7455
C0058	A0279	1-methyl-1H-1,2,4-triazol-1-ium	ethyl phosphonite	0.582258	-4.31056
C0058	A0280	1-methyl-1H-1,2,4-triazol-1-ium	butyl phosphonite	0.627695	-5.56694
C0058	A0281	1-methyl-1H-1,2,4-triazol-1-ium	hexyl phosphonite	0.663096	-6.057
C0058	A0295	1-methyl-1H-1,2,4-triazol-1-ium	1H-1,2,4-triazol-1-ide	0.456456	0.27519
C0058	A0296	1-methyl-1H-1,2,4-triazol-1-ium	1H-1,2,3,4-tetrazol-1-ide	0.374474	4.43185
C0058	A0307	1-methyl-1H-1,2,4-triazol-1-ium	(1r,4r)-4-fluorocyclohexan-1-olate	0.79662	-12.2941
C0058	A0317	1-methyl-1H-1,2,4-triazol-1-ium	pyridin-3-olate	0.505668	-2.05797
C0058	A0320	1-methyl-1H-1,2,4-triazol-1-ium	hydrogen phosphonate	0.571903	0.31254
C0058	A0391	1-methyl-1H-1,2,4-triazol-1-ium	4-methyl-1H-imidazol-1-ide	0.500884	-2.32914
C0058	A0412	1-methyl-1H-1,2,4-triazol-1-ium	hydrogen ethylphosphonate	0.630441	-3.91198
C0058	A0419	1-methyl-1H-1,2,4-triazol-1-ium	ethyl phosphonate	0.563515	-4.09456
C0058	A0420	1-methyl-1H-1,2,4-triazol-1-ium	butyl phosphonate	0.596488	-5.17201
C0058	A0457	1-methyl-1H-1,2,4-triazol-1-ium	hydrogen methylphosphonate	0.649287	-3.23488
C0062	A0012	1-ethylpyridin-1-ium	dihydrogen phosphate	0.989277	-10.8502
C0062	A0017	1-ethylpyridin-1-ium	hydrogen sulfate	0.650601	-3.62104
C0062	A0024	1-ethylpyridin-1-ium	formate	0.954879	-16.9563
C0062	A0030	1-ethylpyridin-1-ium	4-methylbenzene-1-sulfonate	0.753916	-5.57146
C0062	A0031	1-ethylpyridin-1-ium	benzoate	0.868073	-14.7204
C0062	A0033	1-ethylpyridin-1-ium	chloride	1.18244	-15.4142
C0062	A0039	1-ethylpyridin-1-ium	(2E)-3-carboxyprop-2-enoate	0.774933	-7.74665
C0062	A0044	1-ethylpyridin-1-ium	methyl sulfate	0.668517	-4.72431
C0062	A0047	1-ethylpyridin-1-ium	(2E)-but-2-enoate	0.987678	-17.613
C0062	A0050	1-ethylpyridin-1-ium	butyl sulfate	0.698247	-4.41759
C0062	A0051	1-ethylpyridin-1-ium	perchlorate	0.34999	2.26776
C0062	A0054	1-ethylpyridin-1-ium	methanesulfonate	0.824369	-8.92866
C0062	A0062	1-ethylpyridin-1-ium	nitrite	0.805403	-12.6384
C0062	A0063	1-ethylpyridin-1-ium	dinitroazanide	0.327577	1.31808
C0062	A0064	1-ethylpyridin-1-ium	trifluoroacetate	0.496262	-7.51826
C0062	A0070	1-ethylpyridin-1-ium	hydrogen carbonate	0.931112	-13.3512
C0062	A0077	1-ethylpyridin-1-ium	pentyl sulfate	0.707889	-4.32802
C0062	A0081	1-ethylpyridin-1-ium	(2S)-2-hydroxypropanoate	0.731689	-12.3021
C0062	A0083	1-ethylpyridin-1-ium	ethyl sulfate	0.686685	-4.73146
C0062	A0084	1-ethylpyridin-1-ium	trifluoromethanesulfonate	0.352965	-0.41064
C0062	A0087	1-ethylpyridin-1-ium	acetate	1.01154	-19.3443
C0062	A0089	1-ethylpyridin-1-ium	2-chloroacetate	0.852217	-13.9489
C0062	A0090	1-ethylpyridin-1-ium	nitrooxidane	0.62158	-7.15828
C0062	A0091	1-ethylpyridin-1-ium	diethyl phosphate	0.869165	-12.631
C0062	A0092	1-ethylpyridin-1-ium	dibutyl phosphate	0.901547	-12.2489
C0062	A0093	1-ethylpyridin-1-ium	sulfamate	0.79502	-7.86049
C0062	A0094	1-ethylpyridin-1-ium	pyridine-4-carboxylate	0.819197	-12.8989
C0062	A0095	1-ethylpyridin-1-ium	pyridine-3-carboxylate	0.839586	-13.465
C0062	A0097	1-ethylpyridin-1-ium	O-(difluorophosphoryl)oxidanidolate	0.504218	-6.21598
C0062	A0103	1-ethylpyridin-1-ium	ethanesulfonate	0.791997	-8.53013
C0062	A0104	1-ethylpyridin-1-ium	propane-1-sulfonate	0.789066	-8.19195
C0062	A0105	1-ethylpyridin-1-ium	butane-1-sulfonate	0.793271	-8.00975
C0062	A0106	1-ethylpyridin-1-ium	hexane-1-sulfonate	0.804507	-7.74002
C0062	A0107	1-ethylpyridin-1-ium	hydrogen oxalate	0.698182	-6.05713
C0062	A0120	1-ethylpyridin-1-ium	2-hydroxyacetate	0.765635	-12.6518
C0062	A0121	1-ethylpyridin-1-ium	(2R)-2-hydroxypropanoate	0.730863	-12.2152
C0062	A0123	1-ethylpyridin-1-ium	bis[(2R)-2,4,4-trimethylpentyl]phosphinate	0.749111	-16.3534
C0062	A0136	1-ethylpyridin-1-ium	cyclohexanecarboxylate	0.923638	-18.0907
C0062	A0137	1-ethylpyridin-1-ium	2-cyclopentylacetate	0.931434	-17.9343
C0062	A0138	1-ethylpyridin-1-ium	cyclopentanecarboxylate	0.923774	-17.9672
C0062	A0145	1-ethylpyridin-1-ium	2-hydroxybenzoate	0.60594	-7.847
C0062	A0152	1-ethylpyridin-1-ium	benzenolate	0.772642	-14.504
C0062	A0153	1-ethylpyridin-1-ium	4-methylbenzen-1-olate	0.800911	-15.309
C0062	A0154	1-ethylpyridin-1-ium	4-methoxybenzen-1-olate	0.80703	-14.8986
C0062	A0155	1-ethylpyridin-1-ium	4-fluorobenzen-1-olate	0.699633	-14.1764
C0062	A0157	1-ethylpyridin-1-ium	butanoate	0.965001	-18.421
C0062	A0158	1-ethylpyridin-1-ium	hexanoate	0.970527	-18.0248
C0062	A0161	1-ethylpyridin-1-ium	2,2-dimethylpropanoate	0.870806	-17.7972
C0062	A0163	1-ethylpyridin-1-ium	ethanethioate	0.806706	-8.21683
C0062	A0173	1-ethylpyridin-1-ium	(2E)-but-2-enoate	0.986134	-17.5889
C0062	A0175	1-ethylpyridin-1-ium	2-methylbenzene-1-sulfonate	0.686472	-5.19177
C0062	A0179	1-ethylpyridin-1-ium	1H-1,3-benzodiazol-1-ide	0.653699	-11.9077
C0062	A0189	1-ethylpyridin-1-ium	dimethyl phosphate	0.935019	-12.8159
C0062	A0194	1-ethylpyridin-1-ium	2-methylpropanoate	0.92837	-18.1003
C0062	A0195	1-ethylpyridin-1-ium	4-oxopentanoate	1.01678	-17.2526
C0062	A0197	1-ethylpyridin-1-ium	methyl phosphonate	0.899742	-14.032
C0062	A0199	1-ethylpyridin-1-ium	propanoate	0.968758	-18.6801
C0062	A0202	1-ethylpyridin-1-ium	2-aminoethane-1-sulfonate	0.853514	-9.75126
C0062	A0205	1-ethylpyridin-1-ium	1H-1,2,3-triazol-1-ide	0.830838	-13.6724
C0062	A0206	1-ethylpyridin-1-ium	1H-1,2,3,4-tetrazol-5-ide	0.871041	-14.9987
C0062	A0208	1-ethylpyridin-1-ium	2-fluorobenzen-1-olate	0.673099	-12.4357
C0062	A0210	1-ethylpyridin-1-ium	2,2,2-trifluoroethan-1-olate	0.810201	-22.4624
C0062	A0212	1-ethylpyridin-1-ium	2-oxopyrrolidin-1-ide	1.04374	-21.3794
C0062	A0235	1-ethylpyridin-1-ium	4-chlorobenzen-1-olate	0.705196	-12.7574
C0062	A0237	1-ethylpyridin-1-ium	3-chlorobenzen-1-olate	0.678382	-11.813
C0062	A0239	1-ethylpyridin-1-ium	2,4-dichlorobenzen-1-olate	0.650976	-10.4506
C0062	A0240	1-ethylpyridin-1-ium	2,4,6-trichlorobenzen-1-olate	0.627558	-7.87006
C0062	A0241	1-ethylpyridin-1-ium	3-methylbenzen-1-olate	0.795307	-14.9478
C0062	A0242	1-ethylpyridin-1-ium	2-methylbenzen-1-olate	0.7176	-13.6805
C0062	A0243	1-ethylpyridin-1-ium	2,4-dimethylbenzen-1-olate	0.750773	-14.7517
C0062	A0257	1-ethylpyridin-1-ium	1H-pyrazol-1-ide	0.870724	-16.644
C0062	A0269	1-ethylpyridin-1-ium	2-carboxyacetate	0.862019	-9.9967
C0062	A0270	1-ethylpyridin-1-ium	benzenesulfonate	0.730036	-5.21281
C0062	A0272	1-ethylpyridin-1-ium	fluoranesulfonate	0.404206	0.13105
C0062	A0273	1-ethylpyridin-1-ium	2-methoxyacetate	1.00665	-16.4534
C0062	A0278	1-ethylpyridin-1-ium	hexyl sulfate	0.71948	-4.23447
C0062	A0279	1-ethylpyridin-1-ium	ethyl phosphonite	0.907133	-15.8304
C0062	A0280	1-ethylpyridin-1-ium	butyl phosphonite	0.913858	-15.3219
C0062	A0281	1-ethylpyridin-1-ium	hexyl phosphonite	0.927704	-15.0356
C0062	A0295	1-ethylpyridin-1-ium	1H-1,2,4-triazol-1-ide	0.818134	-14.5233
C0062	A0296	1-ethylpyridin-1-ium	1H-1,2,3,4-tetrazol-1-ide	0.713213	-9.87896
C0062	A0307	1-ethylpyridin-1-ium	(1r,4r)-4-fluorocyclohexan-1-olate	1.11172	-28.8819
C0062	A0317	1-ethylpyridin-1-ium	pyridin-3-olate	0.738337	-12.9884
C0062	A0320	1-ethylpyridin-1-ium	hydrogen phosphonate	0.963307	-12.927
C0062	A0391	1-ethylpyridin-1-ium	4-methyl-1H-imidazol-1-ide	0.773411	-15.7473
C0062	A0412	1-ethylpyridin-1-ium	hydrogen ethylphosphonate	0.993326	-14.2344
C0062	A0419	1-ethylpyridin-1-ium	ethyl phosphonate	0.911021	-13.4091
C0062	A0420	1-ethylpyridin-1-ium	butyl phosphonate	0.90955	-12.8923
C0062	A0457	1-ethylpyridin-1-ium	hydrogen methylphosphonate	1.04801	-14.9107
C0064	A0012	1,3-diethyl-1H-imidazol-3-ium	dihydrogen phosphate	1.00018	-10.402
C0064	A0017	1,3-diethyl-1H-imidazol-3-ium	hydrogen sulfate	0.691866	-3.89266
C0064	A0024	1,3-diethyl-1H-imidazol-3-ium	formate	0.966254	-16.6973
C0064	A0030	1,3-diethyl-1H-imidazol-3-ium	4-methylbenzene-1-sulfonate	0.802754	-6.07832
C0064	A0031	1,3-diethyl-1H-imidazol-3-ium	benzoate	0.898039	-15.2772
C0064	A0033	1,3-diethyl-1H-imidazol-3-ium	chloride	1.17949	-14.2091
C0064	A0039	1,3-diethyl-1H-imidazol-3-ium	(2E)-3-carboxyprop-2-enoate	0.809277	-8.26117
C0064	A0044	1,3-diethyl-1H-imidazol-3-ium	methyl sulfate	0.718398	-5.08632
C0064	A0047	1,3-diethyl-1H-imidazol-3-ium	(2E)-but-2-enoate	1.01529	-18.0479
C0064	A0050	1,3-diethyl-1H-imidazol-3-ium	butyl sulfate	0.753701	-4.76586
C0064	A0051	1,3-diethyl-1H-imidazol-3-ium	perchlorate	0.415462	1.50869
C0064	A0054	1,3-diethyl-1H-imidazol-3-ium	methanesulfonate	0.865713	-9.09158
C0064	A0062	1,3-diethyl-1H-imidazol-3-ium	nitrite	0.824461	-12.2057
C0064	A0063	1,3-diethyl-1H-imidazol-3-ium	dinitroazanide	0.388728	0.40506
C0064	A0064	1,3-diethyl-1H-imidazol-3-ium	trifluoroacetate	0.537546	-8.13786
C0064	A0070	1,3-diethyl-1H-imidazol-3-ium	hydrogen carbonate	0.942158	-12.9384
C0064	A0077	1,3-diethyl-1H-imidazol-3-ium	pentyl sulfate	0.762786	-4.63354
C0064	A0081	1,3-diethyl-1H-imidazol-3-ium	(2S)-2-hydroxypropanoate	0.768865	-12.679
C0064	A0083	1,3-diethyl-1H-imidazol-3-ium	ethyl sulfate	0.740291	-5.13329
C0064	A0084	1,3-diethyl-1H-imidazol-3-ium	trifluoromethanesulfonate	0.406133	-1.01398
C0064	A0087	1,3-diethyl-1H-imidazol-3-ium	acetate	1.028	-19.4308
C0064	A0089	1,3-diethyl-1H-imidazol-3-ium	2-chloroacetate	0.884007	-14.2866
C0064	A0090	1,3-diethyl-1H-imidazol-3-ium	nitrooxidane	0.659467	-7.27003
C0064	A0091	1,3-diethyl-1H-imidazol-3-ium	diethyl phosphate	0.91227	-13.1978
C0064	A0092	1,3-diethyl-1H-imidazol-3-ium	dibutyl phosphate	0.945261	-12.7639
C0064	A0093	1,3-diethyl-1H-imidazol-3-ium	sulfamate	0.821544	-7.6508
C0064	A0094	1,3-diethyl-1H-imidazol-3-ium	pyridine-4-carboxylate	0.85105	-13.5388
C0064	A0095	1,3-diethyl-1H-imidazol-3-ium	pyridine-3-carboxylate	0.870602	-14.0938
C0064	A0097	1,3-diethyl-1H-imidazol-3-ium	O-(difluorophosphoryl)oxidanidolate	0.550079	-6.81223
C0064	A0103	1,3-diethyl-1H-imidazol-3-ium	ethanesulfonate	0.839075	-8.9018
C0064	A0104	1,3-diethyl-1H-imidazol-3-ium	propane-1-sulfonate	0.839724	-8.61698
C0064	A0105	1,3-diethyl-1H-imidazol-3-ium	butane-1-sulfonate	0.845601	-8.44223
C0064	A0106	1,3-diethyl-1H-imidazol-3-ium	hexane-1-sulfonate	0.85769	-8.14239
C0064	A0107	1,3-diethyl-1H-imidazol-3-ium	hydrogen oxalate	0.73346	-6.41147
C0064	A0120	1,3-diethyl-1H-imidazol-3-ium	2-hydroxyacetate	0.798428	-12.9163
C0064	A0121	1,3-diethyl-1H-imidazol-3-ium	(2R)-2-hydroxypropanoate	0.76824	-12.5914
C0064	A0123	1,3-diethyl-1H-imidazol-3-ium	bis[(2R)-2,4,4-trimethylpentyl]phosphinate	0.759463	-16.7522
C0064	A0136	1,3-diethyl-1H-imidazol-3-ium	cyclohexanecarboxylate	0.952017	-18.4953
C0064	A0137	1,3-diethyl-1H-imidazol-3-ium	2-cyclopentylacetate	0.960879	-18.355
C0064	A0138	1,3-diethyl-1H-imidazol-3-ium	cyclopentanecarboxylate	0.951673	-18.3666
C0064	A0145	1,3-diethyl-1H-imidazol-3-ium	2-hydroxybenzoate	0.644422	-8.3686
C0064	A0152	1,3-diethyl-1H-imidazol-3-ium	benzenolate	0.801366	-14.9654
C0064	A0153	1,3-diethyl-1H-imidazol-3-ium	4-methylbenzen-1-olate	0.827251	-15.7322
C0064	A0154	1,3-diethyl-1H-imidazol-3-ium	4-methoxybenzen-1-olate	0.837365	-15.3495
C0064	A0155	1,3-diethyl-1H-imidazol-3-ium	4-fluorobenzen-1-olate	0.727911	-14.647
C0064	A0157	1,3-diethyl-1H-imidazol-3-ium	butanoate	0.990873	-18.8078
C0064	A0158	1,3-diethyl-1H-imidazol-3-ium	hexanoate	1.00013	-18.4929
C0064	A0161	1,3-diethyl-1H-imidazol-3-ium	2,2-dimethylpropanoate	0.895212	-18.1266
C0064	A0163	1,3-diethyl-1H-imidazol-3-ium	ethanethioate	0.843771	-8.63616
C0064	A0173	1,3-diethyl-1H-imidazol-3-ium	(2E)-but-2-enoate	1.01373	-18.0221
C0064	A0175	1,3-diethyl-1H-imidazol-3-ium	2-methylbenzene-1-sulfonate	0.732522	-5.72204
C0064	A0179	1,3-diethyl-1H-imidazol-3-ium	1H-1,3-benzodiazol-1-ide	0.687913	-12.3542
C0064	A0189	1,3-diethyl-1H-imidazol-3-ium	dimethyl phosphate	0.976346	-13.3032
C0064	A0194	1,3-diethyl-1H-imidazol-3-ium	2-methylpropanoate	0.953549	-18.4626
C0064	A0195	1,3-diethyl-1H-imidazol-3-ium	4-oxopentanoate	1.0543	-17.6582
C0064	A0197	1,3-diethyl-1H-imidazol-3-ium	methyl phosphonate	0.932947	-14.394
C0064	A0199	1,3-diethyl-1H-imidazol-3-ium	propanoate	0.990816	-18.9845
C0064	A0202	1,3-diethyl-1H-imidazol-3-ium	2-aminoethane-1-sulfonate	0.894459	-9.89745
C0064	A0205	1,3-diethyl-1H-imidazol-3-ium	1H-1,2,3-triazol-1-ide	0.852759	-13.9842
C0064	A0206	1,3-diethyl-1H-imidazol-3-ium	1H-1,2,3,4-tetrazol-5-ide	0.877823	-14.7097
C0064	A0208	1,3-diethyl-1H-imidazol-3-ium	2-fluorobenzen-1-olate	0.704823	-12.9262
C0064	A0210	1,3-diethyl-1H-imidazol-3-ium	2,2,2-trifluoroethan-1-olate	0.824987	-22.7806
C0064	A0212	1,3-diethyl-1H-imidazol-3-ium	2-oxopyrrolidin-1-ide	1.05841	-21.8189
C0064	A0235	1,3-diethyl-1H-imidazol-3-ium	4-chlorobenzen-1-olate	0.733247	-13.1595
C0064	A0237	1,3-diethyl-1H-imidazol-3-ium	3-chlorobenzen-1-olate	0.707531	-12.2017
C0064	A0239	1,3-diethyl-1H-imidazol-3-ium	2,4-dichlorobenzen-1-olate	0.676219	-10.6744
C0064	A0240	1,3-diethyl-1H-imidazol-3-ium	2,4,6-trichlorobenzen-1-olate	0.645336	-7.87818
C0064	A0241	1,3-diethyl-1H-imidazol-3-ium	3-methylbenzen-1-olate	0.823076	-15.3739
C0064	A0242	1,3-diethyl-1H-imidazol-3-ium	2-methylbenzen-1-olate	0.74637	-14.0426
C0064	A0243	1,3-diethyl-1H-imidazol-3-ium	2,4-dimethylbenzen-1-olate	0.775081	-15.0397
C0064	A0257	1,3-diethyl-1H-imidazol-3-ium	1H-pyrazol-1-ide	0.890325	-16.935
C0064	A0269	1,3-diethyl-1H-imidazol-3-ium	2-carboxyacetate	0.891911	-10.2221
C0064	A0270	1,3-diethyl-1H-imidazol-3-ium	benzenesulfonate	0.777687	-5.78001
C0064	A0272	1,3-diethyl-1H-imidazol-3-ium	fluoranesulfonate	0.463447	-0.63291
C0064	A0273	1,3-diethyl-1H-imidazol-3-ium	2-methoxyacetate	1.04009	-16.8525
C0064	A0278	1,3-diethyl-1H-imidazol-3-ium	hexyl sulfate	0.773418	-4.49667
C0064	A0279	1,3-diethyl-1H-imidazol-3-ium	ethyl phosphonite	0.93949	-16.2382
C0064	A0280	1,3-diethyl-1H-imidazol-3-ium	butyl phosphonite	0.948803	-15.761
C0064	A0281	1,3-diethyl-1H-imidazol-3-ium	hexyl phosphonite	0.961963	-15.4508
C0064	A0295	1,3-diethyl-1H-imidazol-3-ium	1H-1,2,4-triazol-1-ide	0.839592	-14.8416
C0064	A0296	1,3-diethyl-1H-imidazol-3-ium	1H-1,2,3,4-tetrazol-1-ide	0.738605	-10.2075
C0064	A0307	1,3-diethyl-1H-imidazol-3-ium	(1r,4r)-4-fluorocyclohexan-1-olate	1.11871	-29.2448
C0064	A0317	1,3-diethyl-1H-imidazol-3-ium	pyridin-3-olate	0.768499	-13.5751
C0064	A0320	1,3-diethyl-1H-imidazol-3-ium	hydrogen phosphonate	0.979563	-12.7242
C0064	A0391	1,3-diethyl-1H-imidazol-3-ium	4-methyl-1H-imidazol-1-ide	0.80203	-16.131
C0064	A0412	1,3-diethyl-1H-imidazol-3-ium	hydrogen ethylphosphonate	1.01888	-14.5364
C0064	A0419	1,3-diethyl-1H-imidazol-3-ium	ethyl phosphonate	0.949017	-13.8811
C0064	A0420	1,3-diethyl-1H-imidazol-3-ium	butyl phosphonate	0.95151	-13.4273
C0064	A0457	1,3-diethyl-1H-imidazol-3-ium	hydrogen methylphosphonate	1.06777	-14.9799
C0067	A0012	1,4-dimethylpyridin-1-ium	dihydrogen phosphate	1.02503	-11.5574
C0067	A0017	1,4-dimethylpyridin-1-ium	hydrogen sulfate	0.684806	-4.23142
C0067	A0024	1,4-dimethylpyridin-1-ium	formate	0.993753	-17.919
C0067	A0030	1,4-dimethylpyridin-1-ium	4-methylbenzene-1-sulfonate	0.782603	-5.97399
C0067	A0031	1,4-dimethylpyridin-1-ium	benzoate	0.897318	-15.5549
C0067	A0033	1,4-dimethylpyridin-1-ium	chloride	1.22674	-16.2216
C0067	A0039	1,4-dimethylpyridin-1-ium	(2E)-3-carboxyprop-2-enoate	0.803075	-8.35229
C0067	A0044	1,4-dimethylpyridin-1-ium	methyl sulfate	0.701357	-5.23276
C0067	A0047	1,4-dimethylpyridin-1-ium	(2E)-but-2-enoate	1.02323	-18.5686
C0067	A0050	1,4-dimethylpyridin-1-ium	butyl sulfate	0.726897	-4.75859
C0067	A0051	1,4-dimethylpyridin-1-ium	perchlorate	0.376135	1.9131
C0067	A0054	1,4-dimethylpyridin-1-ium	methanesulfonate	0.862436	-9.57352
C0067	A0062	1,4-dimethylpyridin-1-ium	nitrite	0.844916	-13.5272
C0067	A0063	1,4-dimethylpyridin-1-ium	dinitroazanide	0.34795	1.03342
C0067	A0064	1,4-dimethylpyridin-1-ium	trifluoroacetate	0.520377	-8.08542
C0067	A0070	1,4-dimethylpyridin-1-ium	hydrogen carbonate	0.968793	-14.1667
C0067	A0077	1,4-dimethylpyridin-1-ium	pentyl sulfate	0.735578	-4.6363
C0067	A0081	1,4-dimethylpyridin-1-ium	(2S)-2-hydroxypropanoate	0.763224	-13.0463
C0067	A0083	1,4-dimethylpyridin-1-ium	ethyl sulfate	0.718146	-5.17468
C0067	A0084	1,4-dimethylpyridin-1-ium	trifluoromethanesulfonate	0.371233	-0.63662
C0067	A0087	1,4-dimethylpyridin-1-ium	acetate	1.04909	-20.3753
C0067	A0089	1,4-dimethylpyridin-1-ium	2-chloroacetate	0.885398	-14.768
C0067	A0090	1,4-dimethylpyridin-1-ium	nitrooxidane	0.656936	-7.87907
C0067	A0091	1,4-dimethylpyridin-1-ium	diethyl phosphate	0.902053	-13.2736
C0067	A0092	1,4-dimethylpyridin-1-ium	dibutyl phosphate	0.933009	-12.8169
C0067	A0093	1,4-dimethylpyridin-1-ium	sulfamate	0.831628	-8.4964
C0067	A0094	1,4-dimethylpyridin-1-ium	pyridine-4-carboxylate	0.84872	-13.6825
C0067	A0095	1,4-dimethylpyridin-1-ium	pyridine-3-carboxylate	0.869641	-14.2705
C0067	A0097	1,4-dimethylpyridin-1-ium	O-(difluorophosphoryl)oxidanidolate	0.531626	-6.79579
C0067	A0103	1,4-dimethylpyridin-1-ium	ethanesulfonate	0.827913	-9.11845
C0067	A0104	1,4-dimethylpyridin-1-ium	propane-1-sulfonate	0.823587	-8.72387
C0067	A0105	1,4-dimethylpyridin-1-ium	butane-1-sulfonate	0.826745	-8.49885
C0067	A0106	1,4-dimethylpyridin-1-ium	hexane-1-sulfonate	0.836447	-8.16793
C0067	A0107	1,4-dimethylpyridin-1-ium	hydrogen oxalate	0.730222	-6.71559
C0067	A0120	1,4-dimethylpyridin-1-ium	2-hydroxyacetate	0.799902	-13.4605
C0067	A0121	1,4-dimethylpyridin-1-ium	(2R)-2-hydroxypropanoate	0.76245	-12.9568
C0067	A0123	1,4-dimethylpyridin-1-ium	bis[(2R)-2,4,4-trimethylpentyl]phosphinate	0.770715	-17.0727
C0067	A0136	1,4-dimethylpyridin-1-ium	cyclohexanecarboxylate	0.955264	-18.9739
C0067	A0137	1,4-dimethylpyridin-1-ium	2-cyclopentylacetate	0.963122	-18.8088
C0067	A0138	1,4-dimethylpyridin-1-ium	cyclopentanecarboxylate	0.955357	-18.8588
C0067	A0145	1,4-dimethylpyridin-1-ium	2-hydroxybenzoate	0.627237	-8.37971
C0067	A0152	1,4-dimethylpyridin-1-ium	benzenolate	0.797883	-15.313
C0067	A0153	1,4-dimethylpyridin-1-ium	4-methylbenzen-1-olate	0.82468	-16.0971
C0067	A0154	1,4-dimethylpyridin-1-ium	4-methoxybenzen-1-olate	0.832104	-15.6765
C0067	A0155	1,4-dimethylpyridin-1-ium	4-fluorobenzen-1-olate	0.721258	-14.9318
C0067	A0157	1,4-dimethylpyridin-1-ium	butanoate	0.998575	-19.3615
C0067	A0158	1,4-dimethylpyridin-1-ium	hexanoate	1.00301	-18.9081
C0067	A0161	1,4-dimethylpyridin-1-ium	2,2-dimethylpropanoate	0.899935	-18.6812
C0067	A0163	1,4-dimethylpyridin-1-ium	ethanethioate	0.839507	-8.90402
C0067	A0173	1,4-dimethylpyridin-1-ium	(2E)-but-2-enoate	1.02167	-18.5433
C0067	A0175	1,4-dimethylpyridin-1-ium	2-methylbenzene-1-sulfonate	0.712404	-5.58115
C0067	A0179	1,4-dimethylpyridin-1-ium	1H-1,3-benzodiazol-1-ide	0.676107	-12.6151
C0067	A0189	1,4-dimethylpyridin-1-ium	dimethyl phosphate	0.972493	-13.5275
C0067	A0194	1,4-dimethylpyridin-1-ium	2-methylpropanoate	0.960877	-19.0253
C0067	A0195	1,4-dimethylpyridin-1-ium	4-oxopentanoate	1.05414	-18.1387
C0067	A0197	1,4-dimethylpyridin-1-ium	methyl phosphonate	0.935647	-14.8078
C0067	A0199	1,4-dimethylpyridin-1-ium	propanoate	1.0034	-19.6572
C0067	A0202	1,4-dimethylpyridin-1-ium	2-aminoethane-1-sulfonate	0.889352	-10.3537
C0067	A0205	1,4-dimethylpyridin-1-ium	1H-1,2,3-triazol-1-ide	0.866371	-14.5601
C0067	A0206	1,4-dimethylpyridin-1-ium	1H-1,2,3,4-tetrazol-5-ide	0.905225	-15.9189
C0067	A0208	1,4-dimethylpyridin-1-ium	2-fluorobenzen-1-olate	0.69532	-13.1461
C0067	A0210	1,4-dimethylpyridin-1-ium	2,2,2-trifluoroethan-1-olate	0.831984	-23.4627
C0067	A0212	1,4-dimethylpyridin-1-ium	2-oxopyrrolidin-1-ide	1.07656	-22.4075
C0067	A0235	1,4-dimethylpyridin-1-ium	4-chlorobenzen-1-olate	0.723704	-13.4194
C0067	A0237	1,4-dimethylpyridin-1-ium	3-chlorobenzen-1-olate	0.696214	-12.437
C0067	A0239	1,4-dimethylpyridin-1-ium	2,4-dichlorobenzen-1-olate	0.663663	-10.9593
C0067	A0240	1,4-dimethylpyridin-1-ium	2,4,6-trichlorobenzen-1-olate	0.635115	-8.2195
C0067	A0241	1,4-dimethylpyridin-1-ium	3-methylbenzen-1-olate	0.819562	-15.7292
C0067	A0242	1,4-dimethylpyridin-1-ium	2-methylbenzen-1-olate	0.738831	-14.404
C0067	A0243	1,4-dimethylpyridin-1-ium	2,4-dimethylbenzen-1-olate	0.770738	-15.4725
C0067	A0257	1,4-dimethylpyridin-1-ium	1H-pyrazol-1-ide	0.904261	-17.6099
C0067	A0269	1,4-dimethylpyridin-1-ium	2-carboxyacetate	0.894813	-10.6942
C0067	A0270	1,4-dimethylpyridin-1-ium	benzenesulfonate	0.758664	-5.64549
C0067	A0272	1,4-dimethylpyridin-1-ium	fluoranesulfonate	0.430563	-0.29863
C0067	A0273	1,4-dimethylpyridin-1-ium	2-methoxyacetate	1.04561	-17.347
C0067	A0278	1,4-dimethylpyridin-1-ium	hexyl sulfate	0.746418	-4.5163
C0067	A0279	1,4-dimethylpyridin-1-ium	ethyl phosphonite	0.938596	-16.663
C0067	A0280	1,4-dimethylpyridin-1-ium	butyl phosphonite	0.943118	-16.0728
C0067	A0281	1,4-dimethylpyridin-1-ium	hexyl phosphonite	0.955594	-15.7414
C0067	A0295	1,4-dimethylpyridin-1-ium	1H-1,2,4-triazol-1-ide	0.852756	-15.441
C0067	A0296	1,4-dimethylpyridin-1-ium	1H-1,2,3,4-tetrazol-1-ide	0.747716	-10.696
C0067	A0307	1,4-dimethylpyridin-1-ium	(1r,4r)-4-fluorocyclohexan-1-olate	1.13456	-30.0611
C0067	A0317	1,4-dimethylpyridin-1-ium	pyridin-3-olate	0.764697	-13.7565
C0067	A0320	1,4-dimethylpyridin-1-ium	hydrogen phosphonate	0.99937	-13.701
C0067	A0391	1,4-dimethylpyridin-1-ium	4-methyl-1H-imidazol-1-ide	0.802313	-16.6273
C0067	A0412	1,4-dimethylpyridin-1-ium	hydrogen ethylphosphonate	1.02802	-14.9924
C0067	A0419	1,4-dimethylpyridin-1-ium	ethyl phosphonate	0.946608	-14.1304
C0067	A0420	1,4-dimethylpyridin-1-ium	butyl phosphonate	0.943119	-13.5379
C0067	A0457	1,4-dimethylpyridin-1-ium	hydrogen methylphosphonate	1.08497	-15.7143
C0077	A0012	3-(2-cyanoethyl)-1-(prop-2-en-1-yl)-1H-imidazol-3-ium	dihydrogen phosphate	0.929246	-6.53013
C0077	A0017	3-(2-cyanoethyl)-1-(prop-2-en-1-yl)-1H-imidazol-3-ium	hydrogen sulfate	0.601143	-0.28444
C0077	A0024	3-(2-cyanoethyl)-1-(prop-2-en-1-yl)-1H-imidazol-3-ium	formate	0.88879	-11.169
C0077	A0030	3-(2-cyanoethyl)-1-(prop-2-en-1-yl)-1H-imidazol-3-ium	4-methylbenzene-1-sulfonate	0.743203	-3.27792
C0077	A0031	3-(2-cyanoethyl)-1-(prop-2-en-1-yl)-1H-imidazol-3-ium	benzoate	0.857697	-10.5296
C0077	A0033	3-(2-cyanoethyl)-1-(prop-2-en-1-yl)-1H-imidazol-3-ium	chloride	1.08983	-9.56541
C0077	A0039	3-(2-cyanoethyl)-1-(prop-2-en-1-yl)-1H-imidazol-3-ium	(2E)-3-carboxyprop-2-enoate	0.767626	-4.67224
C0077	A0044	3-(2-cyanoethyl)-1-(prop-2-en-1-yl)-1H-imidazol-3-ium	methyl sulfate	0.629888	-1.67901
C0077	A0047	3-(2-cyanoethyl)-1-(prop-2-en-1-yl)-1H-imidazol-3-ium	(2E)-but-2-enoate	0.956694	-12.7069
C0077	A0050	3-(2-cyanoethyl)-1-(prop-2-en-1-yl)-1H-imidazol-3-ium	butyl sulfate	0.688887	-2.32812
C0077	A0051	3-(2-cyanoethyl)-1-(prop-2-en-1-yl)-1H-imidazol-3-ium	perchlorate	0.333373	4.08922
C0077	A0054	3-(2-cyanoethyl)-1-(prop-2-en-1-yl)-1H-imidazol-3-ium	methanesulfonate	0.769166	-5.05787
C0077	A0062	3-(2-cyanoethyl)-1-(prop-2-en-1-yl)-1H-imidazol-3-ium	nitrite	0.728808	-7.17682
C0077	A0063	3-(2-cyanoethyl)-1-(prop-2-en-1-yl)-1H-imidazol-3-ium	dinitroazanide	0.338505	2.74484
C0077	A0064	3-(2-cyanoethyl)-1-(prop-2-en-1-yl)-1H-imidazol-3-ium	trifluoroacetate	0.499853	-4.32245
C0077	A0070	3-(2-cyanoethyl)-1-(prop-2-en-1-yl)-1H-imidazol-3-ium	hydrogen carbonate	0.864796	-8.32127
C0077	A0077	3-(2-cyanoethyl)-1-(prop-2-en-1-yl)-1H-imidazol-3-ium	pentyl sulfate	0.7045	-2.4246
C0077	A0081	3-(2-cyanoethyl)-1-(prop-2-en-1-yl)-1H-imidazol-3-ium	(2S)-2-hydroxypropanoate	0.711975	-8.20292
C0077	A0083	3-(2-cyanoethyl)-1-(prop-2-en-1-yl)-1H-imidazol-3-ium	ethyl sulfate	0.659593	-2.07148
C0077	A0084	3-(2-cyanoethyl)-1-(prop-2-en-1-yl)-1H-imidazol-3-ium	trifluoromethanesulfonate	0.378409	1.06313
C0077	A0087	3-(2-cyanoethyl)-1-(prop-2-en-1-yl)-1H-imidazol-3-ium	acetate	0.964458	-13.6721
C0077	A0089	3-(2-cyanoethyl)-1-(prop-2-en-1-yl)-1H-imidazol-3-ium	2-chloroacetate	0.820056	-9.38837
C0077	A0090	3-(2-cyanoethyl)-1-(prop-2-en-1-yl)-1H-imidazol-3-ium	nitrooxidane	0.566024	-2.82045
C0077	A0091	3-(2-cyanoethyl)-1-(prop-2-en-1-yl)-1H-imidazol-3-ium	diethyl phosphate	0.859796	-9.16584
C0077	A0092	3-(2-cyanoethyl)-1-(prop-2-en-1-yl)-1H-imidazol-3-ium	dibutyl phosphate	0.909905	-9.29549
C0077	A0093	3-(2-cyanoethyl)-1-(prop-2-en-1-yl)-1H-imidazol-3-ium	sulfamate	0.72889	-3.97138
C0077	A0094	3-(2-cyanoethyl)-1-(prop-2-en-1-yl)-1H-imidazol-3-ium	pyridine-4-carboxylate	0.806142	-8.99265
C0077	A0095	3-(2-cyanoethyl)-1-(prop-2-en-1-yl)-1H-imidazol-3-ium	pyridine-3-carboxylate	0.823659	-9.43829
C0077	A0097	3-(2-cyanoethyl)-1-(prop-2-en-1-yl)-1H-imidazol-3-ium	O-(difluorophosphoryl)oxidanidolate	0.48791	-2.85927
C0077	A0103	3-(2-cyanoethyl)-1-(prop-2-en-1-yl)-1H-imidazol-3-ium	ethanesulfonate	0.754389	-5.12076
C0077	A0104	3-(2-cyanoethyl)-1-(prop-2-en-1-yl)-1H-imidazol-3-ium	propane-1-sulfonate	0.761739	-5.14354
C0077	A0105	3-(2-cyanoethyl)-1-(prop-2-en-1-yl)-1H-imidazol-3-ium	butane-1-sulfonate	0.773561	-5.21842
C0077	A0106	3-(2-cyanoethyl)-1-(prop-2-en-1-yl)-1H-imidazol-3-ium	hexane-1-sulfonate	0.796361	-5.31754
C0077	A0107	3-(2-cyanoethyl)-1-(prop-2-en-1-yl)-1H-imidazol-3-ium	hydrogen oxalate	0.661969	-2.53841
C0077	A0120	3-(2-cyanoethyl)-1-(prop-2-en-1-yl)-1H-imidazol-3-ium	2-hydroxyacetate	0.728184	-8.10131
C0077	A0121	3-(2-cyanoethyl)-1-(prop-2-en-1-yl)-1H-imidazol-3-ium	(2R)-2-hydroxypropanoate	0.710922	-8.12727
C0077	A0123	3-(2-cyanoethyl)-1-(prop-2-en-1-yl)-1H-imidazol-3-ium	bis[(2R)-2,4,4-trimethylpentyl]phosphinate	0.809606	-13.0499
C0077	A0136	3-(2-cyanoethyl)-1-(prop-2-en-1-yl)-1H-imidazol-3-ium	cyclohexanecarboxylate	0.923572	-13.6413
C0077	A0137	3-(2-cyanoethyl)-1-(prop-2-en-1-yl)-1H-imidazol-3-ium	2-cyclopentylacetate	0.932114	-13.5618
C0077	A0138	3-(2-cyanoethyl)-1-(prop-2-en-1-yl)-1H-imidazol-3-ium	cyclopentanecarboxylate	0.919435	-13.4267
C0077	A0145	3-(2-cyanoethyl)-1-(prop-2-en-1-yl)-1H-imidazol-3-ium	2-hydroxybenzoate	0.622226	-5.00186
C0077	A0152	3-(2-cyanoethyl)-1-(prop-2-en-1-yl)-1H-imidazol-3-ium	benzenolate	0.766706	-10.3156
C0077	A0153	3-(2-cyanoethyl)-1-(prop-2-en-1-yl)-1H-imidazol-3-ium	4-methylbenzen-1-olate	0.806693	-11.255
C0077	A0154	3-(2-cyanoethyl)-1-(prop-2-en-1-yl)-1H-imidazol-3-ium	4-methoxybenzen-1-olate	0.808124	-10.8751
C0077	A0155	3-(2-cyanoethyl)-1-(prop-2-en-1-yl)-1H-imidazol-3-ium	4-fluorobenzen-1-olate	0.708156	-10.1918
C0077	A0157	3-(2-cyanoethyl)-1-(prop-2-en-1-yl)-1H-imidazol-3-ium	butanoate	0.948354	-13.5665
C0077	A0158	3-(2-cyanoethyl)-1-(prop-2-en-1-yl)-1H-imidazol-3-ium	hexanoate	0.970254	-13.6361
C0077	A0161	3-(2-cyanoethyl)-1-(prop-2-en-1-yl)-1H-imidazol-3-ium	2,2-dimethylpropanoate	0.870682	-13.23
C0077	A0163	3-(2-cyanoethyl)-1-(prop-2-en-1-yl)-1H-imidazol-3-ium	ethanethioate	0.766403	-4.61659
C0077	A0173	3-(2-cyanoethyl)-1-(prop-2-en-1-yl)-1H-imidazol-3-ium	(2E)-but-2-enoate	0.955182	-12.6872
C0077	A0175	3-(2-cyanoethyl)-1-(prop-2-en-1-yl)-1H-imidazol-3-ium	2-methylbenzene-1-sulfonate	0.686912	-2.98664
C0077	A0179	3-(2-cyanoethyl)-1-(prop-2-en-1-yl)-1H-imidazol-3-ium	1H-1,3-benzodiazol-1-ide	0.654049	-8.40873
C0077	A0189	3-(2-cyanoethyl)-1-(prop-2-en-1-yl)-1H-imidazol-3-ium	dimethyl phosphate	0.896192	-8.83923
C0077	A0194	3-(2-cyanoethyl)-1-(prop-2-en-1-yl)-1H-imidazol-3-ium	2-methylpropanoate	0.914389	-13.2828
C0077	A0195	3-(2-cyanoethyl)-1-(prop-2-en-1-yl)-1H-imidazol-3-ium	4-oxopentanoate	0.97798	-12.5131
C0077	A0197	3-(2-cyanoethyl)-1-(prop-2-en-1-yl)-1H-imidazol-3-ium	methyl phosphonate	0.861957	-9.60848
C0077	A0199	3-(2-cyanoethyl)-1-(prop-2-en-1-yl)-1H-imidazol-3-ium	propanoate	0.940707	-13.4974
C0077	A0202	3-(2-cyanoethyl)-1-(prop-2-en-1-yl)-1H-imidazol-3-ium	2-aminoethane-1-sulfonate	0.798937	-6.20929
C0077	A0205	3-(2-cyanoethyl)-1-(prop-2-en-1-yl)-1H-imidazol-3-ium	1H-1,2,3-triazol-1-ide	0.771838	-9.05575
C0077	A0206	3-(2-cyanoethyl)-1-(prop-2-en-1-yl)-1H-imidazol-3-ium	1H-1,2,3,4-tetrazol-5-ide	0.803357	-10.0424
C0077	A0208	3-(2-cyanoethyl)-1-(prop-2-en-1-yl)-1H-imidazol-3-ium	2-fluorobenzen-1-olate	0.678838	-8.70391
C0077	A0210	3-(2-cyanoethyl)-1-(prop-2-en-1-yl)-1H-imidazol-3-ium	2,2,2-trifluoroethan-1-olate	0.814305	-16.8128
C0077	A0212	3-(2-cyanoethyl)-1-(prop-2-en-1-yl)-1H-imidazol-3-ium	2-oxopyrrolidin-1-ide	1.02107	-16.1073
C0077	A0235	3-(2-cyanoethyl)-1-(prop-2-en-1-yl)-1H-imidazol-3-ium	4-chlorobenzen-1-olate	0.728912	-9.20905
C0077	A0237	3-(2-cyanoethyl)-1-(prop-2-en-1-yl)-1H-imidazol-3-ium	3-chlorobenzen-1-olate	0.70461	-8.44876
C0077	A0239	3-(2-cyanoethyl)-1-(prop-2-en-1-yl)-1H-imidazol-3-ium	2,4-dichlorobenzen-1-olate	0.698898	-7.5461
C0077	A0240	3-(2-cyanoethyl)-1-(prop-2-en-1-yl)-1H-imidazol-3-ium	2,4,6-trichlorobenzen-1-olate	0.695907	-5.63479
C0077	A0241	3-(2-cyanoethyl)-1-(prop-2-en-1-yl)-1H-imidazol-3-ium	3-methylbenzen-1-olate	0.798808	-10.9266
C0077	A0242	3-(2-cyanoethyl)-1-(prop-2-en-1-yl)-1H-imidazol-3-ium	2-methylbenzen-1-olate	0.730684	-9.9134
C0077	A0243	3-(2-cyanoethyl)-1-(prop-2-en-1-yl)-1H-imidazol-3-ium	2,4-dimethylbenzen-1-olate	0.77369	-11.0118
C0077	A0257	3-(2-cyanoethyl)-1-(prop-2-en-1-yl)-1H-imidazol-3-ium	1H-pyrazol-1-ide	0.823514	-11.6326
C0077	A0269	3-(2-cyanoethyl)-1-(prop-2-en-1-yl)-1H-imidazol-3-ium	2-carboxyacetate	0.829763	-6.21665
C0077	A0270	3-(2-cyanoethyl)-1-(prop-2-en-1-yl)-1H-imidazol-3-ium	benzenesulfonate	0.715569	-2.78539
C0077	A0272	3-(2-cyanoethyl)-1-(prop-2-en-1-yl)-1H-imidazol-3-ium	fluoranesulfonate	0.386179	2.40715
C0077	A0273	3-(2-cyanoethyl)-1-(prop-2-en-1-yl)-1H-imidazol-3-ium	2-methoxyacetate	0.96364	-11.6835
C0077	A0278	3-(2-cyanoethyl)-1-(prop-2-en-1-yl)-1H-imidazol-3-ium	hexyl sulfate	0.720943	-2.48552
C0077	A0279	3-(2-cyanoethyl)-1-(prop-2-en-1-yl)-1H-imidazol-3-ium	ethyl phosphonite	0.887095	-11.2878
C0077	A0280	3-(2-cyanoethyl)-1-(prop-2-en-1-yl)-1H-imidazol-3-ium	butyl phosphonite	0.912204	-11.3477
C0077	A0281	3-(2-cyanoethyl)-1-(prop-2-en-1-yl)-1H-imidazol-3-ium	hexyl phosphonite	0.9385	-11.3957
C0077	A0295	3-(2-cyanoethyl)-1-(prop-2-en-1-yl)-1H-imidazol-3-ium	1H-1,2,4-triazol-1-ide	0.760758	-9.73617
C0077	A0296	3-(2-cyanoethyl)-1-(prop-2-en-1-yl)-1H-imidazol-3-ium	1H-1,2,3,4-tetrazol-1-ide	0.649497	-5.65147
C0077	A0307	3-(2-cyanoethyl)-1-(prop-2-en-1-yl)-1H-imidazol-3-ium	(1r,4r)-4-fluorocyclohexan-1-olate	1.1214	-22.6128
C0077	A0317	3-(2-cyanoethyl)-1-(prop-2-en-1-yl)-1H-imidazol-3-ium	pyridin-3-olate	0.726745	-9.04802
C0077	A0320	3-(2-cyanoethyl)-1-(prop-2-en-1-yl)-1H-imidazol-3-ium	hydrogen phosphonate	0.909426	-8.24319
C0077	A0391	3-(2-cyanoethyl)-1-(prop-2-en-1-yl)-1H-imidazol-3-ium	4-methyl-1H-imidazol-1-ide	0.750989	-11.2939
C0077	A0412	3-(2-cyanoethyl)-1-(prop-2-en-1-yl)-1H-imidazol-3-ium	hydrogen ethylphosphonate	0.964787	-10.1498
C0077	A0419	3-(2-cyanoethyl)-1-(prop-2-en-1-yl)-1H-imidazol-3-ium	ethyl phosphonate	0.882753	-9.40426
C0077	A0420	3-(2-cyanoethyl)-1-(prop-2-en-1-yl)-1H-imidazol-3-ium	butyl phosphonate	0.899073	-9.42851
C0077	A0457	3-(2-cyanoethyl)-1-(prop-2-en-1-yl)-1H-imidazol-3-ium	hydrogen methylphosphonate	1.00202	-10.3794
C0083	A0012	1-(3-cyanopropyl)-3-methyl-1H-imidazol-3-ium	dihydrogen phosphate	1.02853	-9.33464
C0083	A0017	1-(3-cyanopropyl)-3-methyl-1H-imidazol-3-ium	hydrogen sulfate	0.67284	-2.24765
C0083	A0024	1-(3-cyanopropyl)-3-methyl-1H-imidazol-3-ium	formate	0.993806	-14.5887
C0083	A0030	1-(3-cyanopropyl)-3-methyl-1H-imidazol-3-ium	4-methylbenzene-1-sulfonate	0.787099	-4.1803
C0083	A0031	1-(3-cyanopropyl)-3-methyl-1H-imidazol-3-ium	benzoate	0.903006	-12.3688
C0083	A0033	1-(3-cyanopropyl)-3-methyl-1H-imidazol-3-ium	chloride	1.23405	-13.5057
C0083	A0039	1-(3-cyanopropyl)-3-methyl-1H-imidazol-3-ium	(2E)-3-carboxyprop-2-enoate	0.810181	-6.02963
C0083	A0044	1-(3-cyanopropyl)-3-methyl-1H-imidazol-3-ium	methyl sulfate	0.691016	-3.09744
C0083	A0047	1-(3-cyanopropyl)-3-methyl-1H-imidazol-3-ium	(2E)-but-2-enoate	1.03087	-15.1244
C0083	A0050	1-(3-cyanopropyl)-3-methyl-1H-imidazol-3-ium	butyl sulfate	0.734423	-3.09151
C0083	A0051	1-(3-cyanopropyl)-3-methyl-1H-imidazol-3-ium	perchlorate	0.355188	3.35569
C0083	A0054	1-(3-cyanopropyl)-3-methyl-1H-imidazol-3-ium	methanesulfonate	0.855448	-7.10776
C0083	A0062	1-(3-cyanopropyl)-3-methyl-1H-imidazol-3-ium	nitrite	0.83682	-10.5451
C0083	A0063	1-(3-cyanopropyl)-3-methyl-1H-imidazol-3-ium	dinitroazanide	0.336273	2.50858
C0083	A0064	1-(3-cyanopropyl)-3-methyl-1H-imidazol-3-ium	trifluoroacetate	0.521058	-5.29228
C0083	A0070	1-(3-cyanopropyl)-3-methyl-1H-imidazol-3-ium	hydrogen carbonate	0.968626	-11.4718
C0083	A0077	1-(3-cyanopropyl)-3-methyl-1H-imidazol-3-ium	pentyl sulfate	0.748393	-3.11002
C0083	A0081	1-(3-cyanopropyl)-3-methyl-1H-imidazol-3-ium	(2S)-2-hydroxypropanoate	0.768055	-9.98547
C0083	A0083	1-(3-cyanopropyl)-3-methyl-1H-imidazol-3-ium	ethyl sulfate	0.713791	-3.17633
C0083	A0084	1-(3-cyanopropyl)-3-methyl-1H-imidazol-3-ium	trifluoromethanesulfonate	0.378772	0.87614
C0083	A0087	1-(3-cyanopropyl)-3-methyl-1H-imidazol-3-ium	acetate	1.05557	-16.7124
C0083	A0089	1-(3-cyanopropyl)-3-methyl-1H-imidazol-3-ium	2-chloroacetate	0.884475	-11.498
C0083	A0090	1-(3-cyanopropyl)-3-methyl-1H-imidazol-3-ium	nitrooxidane	0.644183	-5.20393
C0083	A0091	1-(3-cyanopropyl)-3-methyl-1H-imidazol-3-ium	diethyl phosphate	0.920744	-10.6951
C0083	A0092	1-(3-cyanopropyl)-3-methyl-1H-imidazol-3-ium	dibutyl phosphate	0.97003	-10.62
C0083	A0093	1-(3-cyanopropyl)-3-methyl-1H-imidazol-3-ium	sulfamate	0.822215	-6.44361
C0083	A0094	1-(3-cyanopropyl)-3-methyl-1H-imidazol-3-ium	pyridine-4-carboxylate	0.85192	-10.7266
C0083	A0095	1-(3-cyanopropyl)-3-methyl-1H-imidazol-3-ium	pyridine-3-carboxylate	0.871788	-11.2498
C0083	A0097	1-(3-cyanopropyl)-3-methyl-1H-imidazol-3-ium	O-(difluorophosphoryl)oxidanidolate	0.521409	-4.03229
C0083	A0103	1-(3-cyanopropyl)-3-methyl-1H-imidazol-3-ium	ethanesulfonate	0.827497	-6.72386
C0083	A0104	1-(3-cyanopropyl)-3-methyl-1H-imidazol-3-ium	propane-1-sulfonate	0.82802	-6.4718
C0083	A0105	1-(3-cyanopropyl)-3-methyl-1H-imidazol-3-ium	butane-1-sulfonate	0.836099	-6.38194
C0083	A0106	1-(3-cyanopropyl)-3-methyl-1H-imidazol-3-ium	hexane-1-sulfonate	0.855342	-6.29646
C0083	A0107	1-(3-cyanopropyl)-3-methyl-1H-imidazol-3-ium	hydrogen oxalate	0.723727	-4.38148
C0083	A0120	1-(3-cyanopropyl)-3-methyl-1H-imidazol-3-ium	2-hydroxyacetate	0.797719	-10.3165
C0083	A0121	1-(3-cyanopropyl)-3-methyl-1H-imidazol-3-ium	(2R)-2-hydroxypropanoate	0.767131	-9.90437
C0083	A0123	1-(3-cyanopropyl)-3-methyl-1H-imidazol-3-ium	bis[(2R)-2,4,4-trimethylpentyl]phosphinate	0.854722	-14.8014
C0083	A0136	1-(3-cyanopropyl)-3-methyl-1H-imidazol-3-ium	cyclohexanecarboxylate	0.986543	-15.6767
C0083	A0137	1-(3-cyanopropyl)-3-methyl-1H-imidazol-3-ium	2-cyclopentylacetate	0.994959	-15.5635
C0083	A0138	1-(3-cyanopropyl)-3-methyl-1H-imidazol-3-ium	cyclopentanecarboxylate	0.981345	-15.4927
C0083	A0145	1-(3-cyanopropyl)-3-methyl-1H-imidazol-3-ium	2-hydroxybenzoate	0.635472	-5.91774
C0083	A0152	1-(3-cyanopropyl)-3-methyl-1H-imidazol-3-ium	benzenolate	0.79726	-12.0427
C0083	A0153	1-(3-cyanopropyl)-3-methyl-1H-imidazol-3-ium	4-methylbenzen-1-olate	0.835526	-12.9421
C0083	A0154	1-(3-cyanopropyl)-3-methyl-1H-imidazol-3-ium	4-methoxybenzen-1-olate	0.839687	-12.5548
C0083	A0155	1-(3-cyanopropyl)-3-methyl-1H-imidazol-3-ium	4-fluorobenzen-1-olate	0.723798	-11.6939
C0083	A0157	1-(3-cyanopropyl)-3-methyl-1H-imidazol-3-ium	butanoate	1.01742	-15.862
C0083	A0158	1-(3-cyanopropyl)-3-methyl-1H-imidazol-3-ium	hexanoate	1.03542	-15.6791
C0083	A0161	1-(3-cyanopropyl)-3-methyl-1H-imidazol-3-ium	2,2-dimethylpropanoate	0.924012	-15.2471
C0083	A0163	1-(3-cyanopropyl)-3-methyl-1H-imidazol-3-ium	ethanethioate	0.828182	-6.32331
C0083	A0173	1-(3-cyanopropyl)-3-methyl-1H-imidazol-3-ium	(2E)-but-2-enoate	1.02933	-15.1021
C0083	A0175	1-(3-cyanopropyl)-3-methyl-1H-imidazol-3-ium	2-methylbenzene-1-sulfonate	0.720813	-3.79653
C0083	A0179	1-(3-cyanopropyl)-3-methyl-1H-imidazol-3-ium	1H-1,3-benzodiazol-1-ide	0.670529	-9.64352
C0083	A0189	1-(3-cyanopropyl)-3-methyl-1H-imidazol-3-ium	dimethyl phosphate	0.975475	-10.7688
C0083	A0194	1-(3-cyanopropyl)-3-methyl-1H-imidazol-3-ium	2-methylpropanoate	0.979537	-15.5242
C0083	A0195	1-(3-cyanopropyl)-3-methyl-1H-imidazol-3-ium	4-oxopentanoate	1.05613	-14.7505
C0083	A0197	1-(3-cyanopropyl)-3-methyl-1H-imidazol-3-ium	methyl phosphonate	0.939774	-11.7983
C0083	A0199	1-(3-cyanopropyl)-3-methyl-1H-imidazol-3-ium	propanoate	1.01551	-16.0461
C0083	A0202	1-(3-cyanopropyl)-3-methyl-1H-imidazol-3-ium	2-aminoethane-1-sulfonate	0.878396	-8.00172
C0083	A0205	1-(3-cyanopropyl)-3-methyl-1H-imidazol-3-ium	1H-1,2,3-triazol-1-ide	0.849606	-11.5785
C0083	A0206	1-(3-cyanopropyl)-3-methyl-1H-imidazol-3-ium	1H-1,2,3,4-tetrazol-5-ide	0.889361	-12.9945
C0083	A0208	1-(3-cyanopropyl)-3-methyl-1H-imidazol-3-ium	2-fluorobenzen-1-olate	0.695787	-10.0649
C0083	A0210	1-(3-cyanopropyl)-3-methyl-1H-imidazol-3-ium	2,2,2-trifluoroethan-1-olate	0.838264	-19.242
C0083	A0212	1-(3-cyanopropyl)-3-methyl-1H-imidazol-3-ium	2-oxopyrrolidin-1-ide	1.0913	-18.7978
C0083	A0235	1-(3-cyanopropyl)-3-methyl-1H-imidazol-3-ium	4-chlorobenzen-1-olate	0.734819	-10.4249
C0083	A0237	1-(3-cyanopropyl)-3-methyl-1H-imidazol-3-ium	3-chlorobenzen-1-olate	0.707839	-9.54306
C0083	A0239	1-(3-cyanopropyl)-3-methyl-1H-imidazol-3-ium	2,4-dichlorobenzen-1-olate	0.688888	-8.35487
C0083	A0240	1-(3-cyanopropyl)-3-methyl-1H-imidazol-3-ium	2,4,6-trichlorobenzen-1-olate	0.677915	-6.14845
C0083	A0241	1-(3-cyanopropyl)-3-methyl-1H-imidazol-3-ium	3-methylbenzen-1-olate	0.828822	-12.5917
C0083	A0242	1-(3-cyanopropyl)-3-methyl-1H-imidazol-3-ium	2-methylbenzen-1-olate	0.748617	-11.3235
C0083	A0243	1-(3-cyanopropyl)-3-methyl-1H-imidazol-3-ium	2,4-dimethylbenzen-1-olate	0.79212	-12.4823
C0083	A0257	1-(3-cyanopropyl)-3-methyl-1H-imidazol-3-ium	1H-pyrazol-1-ide	0.891963	-14.1907
C0083	A0269	1-(3-cyanopropyl)-3-methyl-1H-imidazol-3-ium	2-carboxyacetate	0.896536	-8.14035
C0083	A0270	1-(3-cyanopropyl)-3-methyl-1H-imidazol-3-ium	benzenesulfonate	0.757678	-3.75304
C0083	A0272	1-(3-cyanopropyl)-3-methyl-1H-imidazol-3-ium	fluoranesulfonate	0.410656	1.59637
C0083	A0273	1-(3-cyanopropyl)-3-methyl-1H-imidazol-3-ium	2-methoxyacetate	1.05116	-14.1119
C0083	A0278	1-(3-cyanopropyl)-3-methyl-1H-imidazol-3-ium	hexyl sulfate	0.764207	-3.11902
C0083	A0279	1-(3-cyanopropyl)-3-methyl-1H-imidazol-3-ium	ethyl phosphonite	0.947415	-13.3413
C0083	A0280	1-(3-cyanopropyl)-3-methyl-1H-imidazol-3-ium	butyl phosphonite	0.965186	-13.0745
C0083	A0281	1-(3-cyanopropyl)-3-methyl-1H-imidazol-3-ium	hexyl phosphonite	0.989514	-12.9983
C0083	A0295	1-(3-cyanopropyl)-3-methyl-1H-imidazol-3-ium	1H-1,2,4-triazol-1-ide	0.834787	-12.3193
C0083	A0296	1-(3-cyanopropyl)-3-methyl-1H-imidazol-3-ium	1H-1,2,3,4-tetrazol-1-ide	0.723689	-8.03092
C0083	A0307	1-(3-cyanopropyl)-3-methyl-1H-imidazol-3-ium	(1r,4r)-4-fluorocyclohexan-1-olate	1.16164	-25.7743
C0083	A0317	1-(3-cyanopropyl)-3-methyl-1H-imidazol-3-ium	pyridin-3-olate	0.760717	-10.712
C0083	A0320	1-(3-cyanopropyl)-3-methyl-1H-imidazol-3-ium	hydrogen phosphonate	1.00362	-10.9862
C0083	A0391	1-(3-cyanopropyl)-3-methyl-1H-imidazol-3-ium	4-methyl-1H-imidazol-1-ide	0.797405	-13.2234
C0083	A0412	1-(3-cyanopropyl)-3-methyl-1H-imidazol-3-ium	hydrogen ethylphosphonate	1.04232	-12.2794
C0083	A0419	1-(3-cyanopropyl)-3-methyl-1H-imidazol-3-ium	ethyl phosphonate	0.956561	-11.2974
C0083	A0420	1-(3-cyanopropyl)-3-methyl-1H-imidazol-3-ium	butyl phosphonate	0.964742	-10.9805
C0083	A0457	1-(3-cyanopropyl)-3-methyl-1H-imidazol-3-ium	hydrogen methylphosphonate	1.09336	-12.9376
C0091	A0012	trimethyl(propan-2-yl)azanium	dihydrogen phosphate	1.05433	-13.7897
C0091	A0017	trimethyl(propan-2-yl)azanium	hydrogen sulfate	0.686884	-5.9504
C0091	A0024	trimethyl(propan-2-yl)azanium	formate	1.02641	-20.6553
C0091	A0030	trimethyl(propan-2-yl)azanium	4-methylbenzene-1-sulfonate	0.766914	-6.90395
C0091	A0031	trimethyl(propan-2-yl)azanium	benzoate	0.896248	-17.8057
C0091	A0033	trimethyl(propan-2-yl)azanium	chloride	1.28245	-18.8947
C0091	A0039	trimethyl(propan-2-yl)azanium	(2E)-3-carboxyprop-2-enoate	0.797742	-10.0106
C0091	A0044	trimethyl(propan-2-yl)azanium	methyl sulfate	0.695949	-6.47106
C0091	A0047	trimethyl(propan-2-yl)azanium	(2E)-but-2-enoate	1.04279	-20.8905
C0091	A0050	trimethyl(propan-2-yl)azanium	butyl sulfate	0.716135	-5.36673
C0091	A0051	trimethyl(propan-2-yl)azanium	perchlorate	0.350612	1.01881
C0091	A0054	trimethyl(propan-2-yl)azanium	methanesulfonate	0.87538	-11.113
C0091	A0062	trimethyl(propan-2-yl)azanium	nitrite	0.866512	-16.2834
C0091	A0063	trimethyl(propan-2-yl)azanium	dinitroazanide	0.306318	0.14762
C0091	A0064	trimethyl(propan-2-yl)azanium	trifluoroacetate	0.506991	-9.56226
C0091	A0070	trimethyl(propan-2-yl)azanium	hydrogen carbonate	0.997649	-16.6639
C0091	A0077	trimethyl(propan-2-yl)azanium	pentyl sulfate	0.724639	-5.15632
C0091	A0081	trimethyl(propan-2-yl)azanium	(2S)-2-hydroxypropanoate	0.771893	-14.7617
C0091	A0083	trimethyl(propan-2-yl)azanium	ethyl sulfate	0.710218	-6.12554
C0091	A0084	trimethyl(propan-2-yl)azanium	trifluoromethanesulfonate	0.336465	-1.21176
C0091	A0087	trimethyl(propan-2-yl)azanium	acetate	1.08176	-23.0251
C0091	A0089	trimethyl(propan-2-yl)azanium	2-chloroacetate	0.899766	-16.8338
C0091	A0090	trimethyl(propan-2-yl)azanium	nitrooxidane	0.663443	-9.94375
C0091	A0091	trimethyl(propan-2-yl)azanium	diethyl phosphate	0.913758	-14.4391
C0091	A0092	trimethyl(propan-2-yl)azanium	dibutyl phosphate	0.946858	-13.7163
C0091	A0093	trimethyl(propan-2-yl)azanium	sulfamate	0.844929	-10.4333
C0091	A0094	trimethyl(propan-2-yl)azanium	pyridine-4-carboxylate	0.841971	-15.7778
C0091	A0095	trimethyl(propan-2-yl)azanium	pyridine-3-carboxylate	0.864633	-16.4265
C0091	A0097	trimethyl(propan-2-yl)azanium	O-(difluorophosphoryl)oxidanidolate	0.523951	-8.24339
C0091	A0103	trimethyl(propan-2-yl)azanium	ethanesulfonate	0.836206	-10.3571
C0091	A0104	trimethyl(propan-2-yl)azanium	propane-1-sulfonate	0.829232	-9.72106
C0091	A0105	trimethyl(propan-2-yl)azanium	butane-1-sulfonate	0.831142	-9.33785
C0091	A0106	trimethyl(propan-2-yl)azanium	hexane-1-sulfonate	0.840096	-8.81917
C0091	A0107	trimethyl(propan-2-yl)azanium	hydrogen oxalate	0.730976	-8.62288
C0091	A0120	trimethyl(propan-2-yl)azanium	2-hydroxyacetate	0.813144	-15.4664
C0091	A0121	trimethyl(propan-2-yl)azanium	(2R)-2-hydroxypropanoate	0.771133	-14.6634
C0091	A0123	trimethyl(propan-2-yl)azanium	bis[(2R)-2,4,4-trimethylpentyl]phosphinate	0.795361	-18.5221
C0091	A0136	trimethyl(propan-2-yl)azanium	cyclohexanecarboxylate	0.981224	-20.8475
C0091	A0137	trimethyl(propan-2-yl)azanium	2-cyclopentylacetate	0.988959	-20.6285
C0091	A0138	trimethyl(propan-2-yl)azanium	cyclopentanecarboxylate	0.979504	-20.8078
C0091	A0145	trimethyl(propan-2-yl)azanium	2-hydroxybenzoate	0.602269	-9.93396
C0091	A0152	trimethyl(propan-2-yl)azanium	benzenolate	0.790504	-17.6068
C0091	A0153	trimethyl(propan-2-yl)azanium	4-methylbenzen-1-olate	0.82022	-18.2878
C0091	A0154	trimethyl(propan-2-yl)azanium	4-methoxybenzen-1-olate	0.826936	-17.7934
C0091	A0155	trimethyl(propan-2-yl)azanium	4-fluorobenzen-1-olate	0.709258	-17.1954
C0091	A0157	trimethyl(propan-2-yl)azanium	butanoate	1.02435	-21.502
C0091	A0158	trimethyl(propan-2-yl)azanium	hexanoate	1.02867	-20.7386
C0091	A0161	trimethyl(propan-2-yl)azanium	2,2-dimethylpropanoate	0.920478	-20.7457
C0091	A0163	trimethyl(propan-2-yl)azanium	ethanethioate	0.833679	-10.7584
C0091	A0173	trimethyl(propan-2-yl)azanium	(2E)-but-2-enoate	1.04118	-20.8637
C0091	A0175	trimethyl(propan-2-yl)azanium	2-methylbenzene-1-sulfonate	0.692329	-6.53824
C0091	A0179	trimethyl(propan-2-yl)azanium	1H-1,3-benzodiazol-1-ide	0.645878	-14.9991
C0091	A0189	trimethyl(propan-2-yl)azanium	dimethyl phosphate	0.989321	-14.9966
C0091	A0194	trimethyl(propan-2-yl)azanium	2-methylpropanoate	0.98522	-21.1699
C0091	A0195	trimethyl(propan-2-yl)azanium	4-oxopentanoate	1.07515	-20.1371
C0091	A0197	trimethyl(propan-2-yl)azanium	methyl phosphonate	0.957762	-16.4792
C0091	A0199	trimethyl(propan-2-yl)azanium	propanoate	1.03088	-22.0098
C0091	A0202	trimethyl(propan-2-yl)azanium	2-aminoethane-1-sulfonate	0.898119	-11.7929
C0091	A0205	trimethyl(propan-2-yl)azanium	1H-1,2,3-triazol-1-ide	0.866873	-17.1853
C0091	A0206	trimethyl(propan-2-yl)azanium	1H-1,2,3,4-tetrazol-5-ide	0.907437	-19.213
C0091	A0208	trimethyl(propan-2-yl)azanium	2-fluorobenzen-1-olate	0.679594	-15.2383
C0091	A0210	trimethyl(propan-2-yl)azanium	2,2,2-trifluoroethan-1-olate	0.84785	-26.3868
C0091	A0212	trimethyl(propan-2-yl)azanium	2-oxopyrrolidin-1-ide	1.10532	-24.9017
C0091	A0235	trimethyl(propan-2-yl)azanium	4-chlorobenzen-1-olate	0.706263	-15.4599
C0091	A0237	trimethyl(propan-2-yl)azanium	3-chlorobenzen-1-olate	0.675631	-14.3784
C0091	A0239	trimethyl(propan-2-yl)azanium	2,4-dichlorobenzen-1-olate	0.636061	-12.7128
C0091	A0240	trimethyl(propan-2-yl)azanium	2,4,6-trichlorobenzen-1-olate	0.599402	-9.60018
C0091	A0241	trimethyl(propan-2-yl)azanium	3-methylbenzen-1-olate	0.81451	-17.884
C0091	A0242	trimethyl(propan-2-yl)azanium	2-methylbenzen-1-olate	0.725272	-16.5345
C0091	A0243	trimethyl(propan-2-yl)azanium	2,4-dimethylbenzen-1-olate	0.761811	-17.5768
C0091	A0257	trimethyl(propan-2-yl)azanium	1H-pyrazol-1-ide	0.91035	-20.4942
C0091	A0269	trimethyl(propan-2-yl)azanium	2-carboxyacetate	0.904875	-12.5857
C0091	A0270	trimethyl(propan-2-yl)azanium	benzenesulfonate	0.741114	-6.72383
C0091	A0272	trimethyl(propan-2-yl)azanium	fluoranesulfonate	0.406132	-1.39989
C0091	A0273	trimethyl(propan-2-yl)azanium	2-methoxyacetate	1.07055	-19.33
C0091	A0278	trimethyl(propan-2-yl)azanium	hexyl sulfate	0.735781	-4.97258
C0091	A0279	trimethyl(propan-2-yl)azanium	ethyl phosphonite	0.957518	-18.5105
C0091	A0280	trimethyl(propan-2-yl)azanium	butyl phosphonite	0.959714	-17.5646
C0091	A0281	trimethyl(propan-2-yl)azanium	hexyl phosphonite	0.972416	-17.0836
C0091	A0295	trimethyl(propan-2-yl)azanium	1H-1,2,4-triazol-1-ide	0.852077	-18.1508
C0091	A0296	trimethyl(propan-2-yl)azanium	1H-1,2,3,4-tetrazol-1-ide	0.735364	-13.1855
C0091	A0307	trimethyl(propan-2-yl)azanium	(1r,4r)-4-fluorocyclohexan-1-olate	1.17134	-33.0106
C0091	A0317	trimethyl(propan-2-yl)azanium	pyridin-3-olate	0.75306	-15.8851
C0091	A0320	trimethyl(propan-2-yl)azanium	hydrogen phosphonate	1.03109	-15.8415
C0091	A0391	trimethyl(propan-2-yl)azanium	4-methyl-1H-imidazol-1-ide	0.796388	-19.2506
C0091	A0412	trimethyl(propan-2-yl)azanium	hydrogen ethylphosphonate	1.05452	-16.6704
C0091	A0419	trimethyl(propan-2-yl)azanium	ethyl phosphonate	0.967262	-15.5341
C0091	A0420	trimethyl(propan-2-yl)azanium	butyl phosphonate	0.961304	-14.6097
C0091	A0457	trimethyl(propan-2-yl)azanium	hydrogen methylphosphonate	1.11713	-17.655
C0092	A0012	1-(2-cyanoethyl)-3,5-dimethylpyridin-1-ium	dihydrogen phosphate	0.96934	-7.44951
C0092	A0017	1-(2-cyanoethyl)-3,5-dimethylpyridin-1-ium	hydrogen sulfate	0.664553	-1.60397
C0092	A0024	1-(2-cyanoethyl)-3,5-dimethylpyridin-1-ium	formate	0.924083	-12.3231
C0092	A0030	1-(2-cyanoethyl)-3,5-dimethylpyridin-1-ium	4-methylbenzene-1-sulfonate	0.785074	-4.07882
C0092	A0031	1-(2-cyanoethyl)-3,5-dimethylpyridin-1-ium	benzoate	0.879522	-11.4654
C0092	A0033	1-(2-cyanoethyl)-3,5-dimethylpyridin-1-ium	chloride	1.12224	-10.2828
C0092	A0039	1-(2-cyanoethyl)-3,5-dimethylpyridin-1-ium	(2E)-3-carboxyprop-2-enoate	0.799394	-5.62471
C0092	A0044	1-(2-cyanoethyl)-3,5-dimethylpyridin-1-ium	methyl sulfate	0.691017	-2.82124
C0092	A0047	1-(2-cyanoethyl)-3,5-dimethylpyridin-1-ium	(2E)-but-2-enoate	0.982049	-13.7391
C0092	A0050	1-(2-cyanoethyl)-3,5-dimethylpyridin-1-ium	butyl sulfate	0.736104	-3.05292
C0092	A0051	1-(2-cyanoethyl)-3,5-dimethylpyridin-1-ium	perchlorate	0.401216	2.82174
C0092	A0054	1-(2-cyanoethyl)-3,5-dimethylpyridin-1-ium	methanesulfonate	0.825573	-6.22624
C0092	A0062	1-(2-cyanoethyl)-3,5-dimethylpyridin-1-ium	nitrite	0.783622	-8.43188
C0092	A0063	1-(2-cyanoethyl)-3,5-dimethylpyridin-1-ium	dinitroazanide	0.385403	1.78694
C0092	A0064	1-(2-cyanoethyl)-3,5-dimethylpyridin-1-ium	trifluoroacetate	0.528685	-5.33262
C0092	A0070	1-(2-cyanoethyl)-3,5-dimethylpyridin-1-ium	hydrogen carbonate	0.90504	-9.36949
C0092	A0077	1-(2-cyanoethyl)-3,5-dimethylpyridin-1-ium	pentyl sulfate	0.748264	-3.06094
C0092	A0081	1-(2-cyanoethyl)-3,5-dimethylpyridin-1-ium	(2S)-2-hydroxypropanoate	0.745093	-9.263
C0092	A0083	1-(2-cyanoethyl)-3,5-dimethylpyridin-1-ium	ethyl sulfate	0.715621	-3.05074
C0092	A0084	1-(2-cyanoethyl)-3,5-dimethylpyridin-1-ium	trifluoromethanesulfonate	0.410067	0.3608
C0092	A0087	1-(2-cyanoethyl)-3,5-dimethylpyridin-1-ium	acetate	0.988765	-14.7558
C0092	A0089	1-(2-cyanoethyl)-3,5-dimethylpyridin-1-ium	2-chloroacetate	0.854373	-10.507
C0092	A0090	1-(2-cyanoethyl)-3,5-dimethylpyridin-1-ium	nitrooxidane	0.62842	-4.27041
C0092	A0091	1-(2-cyanoethyl)-3,5-dimethylpyridin-1-ium	diethyl phosphate	0.887128	-10.0744
C0092	A0092	1-(2-cyanoethyl)-3,5-dimethylpyridin-1-ium	dibutyl phosphate	0.928411	-10.0135
C0092	A0093	1-(2-cyanoethyl)-3,5-dimethylpyridin-1-ium	sulfamate	0.785358	-5.06642
C0092	A0094	1-(2-cyanoethyl)-3,5-dimethylpyridin-1-ium	pyridine-4-carboxylate	0.832351	-9.9942
C0092	A0095	1-(2-cyanoethyl)-3,5-dimethylpyridin-1-ium	pyridine-3-carboxylate	0.850127	-10.4573
C0092	A0097	1-(2-cyanoethyl)-3,5-dimethylpyridin-1-ium	O-(difluorophosphoryl)oxidanidolate	0.532365	-4.08413
C0092	A0103	1-(2-cyanoethyl)-3,5-dimethylpyridin-1-ium	ethanesulfonate	0.804333	-6.19341
C0092	A0104	1-(2-cyanoethyl)-3,5-dimethylpyridin-1-ium	propane-1-sulfonate	0.807995	-6.10473
C0092	A0105	1-(2-cyanoethyl)-3,5-dimethylpyridin-1-ium	butane-1-sulfonate	0.816549	-6.08757
C0092	A0106	1-(2-cyanoethyl)-3,5-dimethylpyridin-1-ium	hexane-1-sulfonate	0.833809	-6.04455
C0092	A0107	1-(2-cyanoethyl)-3,5-dimethylpyridin-1-ium	hydrogen oxalate	0.71376	-3.78878
C0092	A0120	1-(2-cyanoethyl)-3,5-dimethylpyridin-1-ium	2-hydroxyacetate	0.768175	-9.3029
C0092	A0121	1-(2-cyanoethyl)-3,5-dimethylpyridin-1-ium	(2R)-2-hydroxypropanoate	0.744368	-9.18859
C0092	A0123	1-(2-cyanoethyl)-3,5-dimethylpyridin-1-ium	bis[(2R)-2,4,4-trimethylpentyl]phosphinate	0.786073	-13.3996
C0092	A0136	1-(2-cyanoethyl)-3,5-dimethylpyridin-1-ium	cyclohexanecarboxylate	0.931052	-14.4233
C0092	A0137	1-(2-cyanoethyl)-3,5-dimethylpyridin-1-ium	2-cyclopentylacetate	0.93957	-14.3363
C0092	A0138	1-(2-cyanoethyl)-3,5-dimethylpyridin-1-ium	cyclopentanecarboxylate	0.929346	-14.244
C0092	A0145	1-(2-cyanoethyl)-3,5-dimethylpyridin-1-ium	2-hydroxybenzoate	0.645444	-5.79048
C0092	A0152	1-(2-cyanoethyl)-3,5-dimethylpyridin-1-ium	benzenolate	0.791743	-11.1363
C0092	A0153	1-(2-cyanoethyl)-3,5-dimethylpyridin-1-ium	4-methylbenzen-1-olate	0.8232	-11.9231
C0092	A0154	1-(2-cyanoethyl)-3,5-dimethylpyridin-1-ium	4-methoxybenzen-1-olate	0.830138	-11.6157
C0092	A0155	1-(2-cyanoethyl)-3,5-dimethylpyridin-1-ium	4-fluorobenzen-1-olate	0.726056	-10.9252
C0092	A0157	1-(2-cyanoethyl)-3,5-dimethylpyridin-1-ium	butanoate	0.962714	-14.4832
C0092	A0158	1-(2-cyanoethyl)-3,5-dimethylpyridin-1-ium	hexanoate	0.978028	-14.4373
C0092	A0161	1-(2-cyanoethyl)-3,5-dimethylpyridin-1-ium	2,2-dimethylpropanoate	0.877936	-14.0051
C0092	A0163	1-(2-cyanoethyl)-3,5-dimethylpyridin-1-ium	ethanethioate	0.815864	-5.70073
C0092	A0173	1-(2-cyanoethyl)-3,5-dimethylpyridin-1-ium	(2E)-but-2-enoate	0.98058	-13.7196
C0092	A0175	1-(2-cyanoethyl)-3,5-dimethylpyridin-1-ium	2-methylbenzene-1-sulfonate	0.722132	-3.75055
C0092	A0179	1-(2-cyanoethyl)-3,5-dimethylpyridin-1-ium	1H-1,3-benzodiazol-1-ide	0.683177	-9.17334
C0092	A0189	1-(2-cyanoethyl)-3,5-dimethylpyridin-1-ium	dimethyl phosphate	0.937656	-9.9498
C0092	A0194	1-(2-cyanoethyl)-3,5-dimethylpyridin-1-ium	2-methylpropanoate	0.927821	-14.1855
C0092	A0195	1-(2-cyanoethyl)-3,5-dimethylpyridin-1-ium	4-oxopentanoate	1.01352	-13.6107
C0092	A0197	1-(2-cyanoethyl)-3,5-dimethylpyridin-1-ium	methyl phosphonate	0.897239	-10.738
C0092	A0199	1-(2-cyanoethyl)-3,5-dimethylpyridin-1-ium	propanoate	0.958927	-14.4974
C0092	A0202	1-(2-cyanoethyl)-3,5-dimethylpyridin-1-ium	2-aminoethane-1-sulfonate	0.853957	-7.24563
C0092	A0205	1-(2-cyanoethyl)-3,5-dimethylpyridin-1-ium	1H-1,2,3-triazol-1-ide	0.816791	-10.1636
C0092	A0206	1-(2-cyanoethyl)-3,5-dimethylpyridin-1-ium	1H-1,2,3,4-tetrazol-5-ide	0.84833	-11.0664
C0092	A0208	1-(2-cyanoethyl)-3,5-dimethylpyridin-1-ium	2-fluorobenzen-1-olate	0.701918	-9.49027
C0092	A0210	1-(2-cyanoethyl)-3,5-dimethylpyridin-1-ium	2,2,2-trifluoroethan-1-olate	0.820631	-17.4759
C0092	A0212	1-(2-cyanoethyl)-3,5-dimethylpyridin-1-ium	2-oxopyrrolidin-1-ide	1.02949	-16.9312
C0092	A0235	1-(2-cyanoethyl)-3,5-dimethylpyridin-1-ium	4-chlorobenzen-1-olate	0.740057	-9.82314
C0092	A0237	1-(2-cyanoethyl)-3,5-dimethylpyridin-1-ium	3-chlorobenzen-1-olate	0.715861	-9.05084
C0092	A0239	1-(2-cyanoethyl)-3,5-dimethylpyridin-1-ium	2,4-dichlorobenzen-1-olate	0.698828	-7.97639
C0092	A0240	1-(2-cyanoethyl)-3,5-dimethylpyridin-1-ium	2,4,6-trichlorobenzen-1-olate	0.684703	-5.88982
C0092	A0241	1-(2-cyanoethyl)-3,5-dimethylpyridin-1-ium	3-methylbenzen-1-olate	0.817591	-11.6212
C0092	A0242	1-(2-cyanoethyl)-3,5-dimethylpyridin-1-ium	2-methylbenzen-1-olate	0.747632	-10.5625
C0092	A0243	1-(2-cyanoethyl)-3,5-dimethylpyridin-1-ium	2,4-dimethylbenzen-1-olate	0.782253	-11.5294
C0092	A0257	1-(2-cyanoethyl)-3,5-dimethylpyridin-1-ium	1H-pyrazol-1-ide	0.859133	-12.6593
C0092	A0269	1-(2-cyanoethyl)-3,5-dimethylpyridin-1-ium	2-carboxyacetate	0.869621	-7.25445
C0092	A0270	1-(2-cyanoethyl)-3,5-dimethylpyridin-1-ium	benzenesulfonate	0.759341	-3.68114
C0092	A0272	1-(2-cyanoethyl)-3,5-dimethylpyridin-1-ium	fluoranesulfonate	0.447989	1.13842
C0092	A0273	1-(2-cyanoethyl)-3,5-dimethylpyridin-1-ium	2-methoxyacetate	0.998233	-12.8047
C0092	A0278	1-(2-cyanoethyl)-3,5-dimethylpyridin-1-ium	hexyl sulfate	0.761747	-3.04918
C0092	A0279	1-(2-cyanoethyl)-3,5-dimethylpyridin-1-ium	ethyl phosphonite	0.914995	-12.2628
C0092	A0280	1-(2-cyanoethyl)-3,5-dimethylpyridin-1-ium	butyl phosphonite	0.931581	-12.1297
C0092	A0281	1-(2-cyanoethyl)-3,5-dimethylpyridin-1-ium	hexyl phosphonite	0.951513	-12.0521
C0092	A0295	1-(2-cyanoethyl)-3,5-dimethylpyridin-1-ium	1H-1,2,4-triazol-1-ide	0.805261	-10.8734
C0092	A0296	1-(2-cyanoethyl)-3,5-dimethylpyridin-1-ium	1H-1,2,3,4-tetrazol-1-ide	0.706161	-6.88883
C0092	A0307	1-(2-cyanoethyl)-3,5-dimethylpyridin-1-ium	(1r,4r)-4-fluorocyclohexan-1-olate	1.11489	-22.9382
C0092	A0317	1-(2-cyanoethyl)-3,5-dimethylpyridin-1-ium	pyridin-3-olate	0.75479	-9.96461
C0092	A0320	1-(2-cyanoethyl)-3,5-dimethylpyridin-1-ium	hydrogen phosphonate	0.945331	-9.27068
C0092	A0391	1-(2-cyanoethyl)-3,5-dimethylpyridin-1-ium	4-methyl-1H-imidazol-1-ide	0.781751	-12.1949
C0092	A0412	1-(2-cyanoethyl)-3,5-dimethylpyridin-1-ium	hydrogen ethylphosphonate	0.988733	-11.0584
C0092	A0419	1-(2-cyanoethyl)-3,5-dimethylpyridin-1-ium	ethyl phosphonate	0.914553	-10.4408
C0092	A0420	1-(2-cyanoethyl)-3,5-dimethylpyridin-1-ium	butyl phosphonate	0.923613	-10.3004
C0092	A0457	1-(2-cyanoethyl)-3,5-dimethylpyridin-1-ium	hydrogen methylphosphonate	1.03095	-11.3373
C0097	A0012	1-(prop-2-en-1-yl)-3-(prop-2-yn-1-yl)-1H-imidazol-3-ium	dihydrogen phosphate	0.863152	-5.54172
C0097	A0017	1-(prop-2-en-1-yl)-3-(prop-2-yn-1-yl)-1H-imidazol-3-ium	hydrogen sulfate	0.563339	0.01049
C0097	A0024	1-(prop-2-en-1-yl)-3-(prop-2-yn-1-yl)-1H-imidazol-3-ium	formate	0.821472	-10.1904
C0097	A0030	1-(prop-2-en-1-yl)-3-(prop-2-yn-1-yl)-1H-imidazol-3-ium	4-methylbenzene-1-sulfonate	0.707048	-3.22417
C0097	A0031	1-(prop-2-en-1-yl)-3-(prop-2-yn-1-yl)-1H-imidazol-3-ium	benzoate	0.816034	-9.95972
C0097	A0033	1-(prop-2-en-1-yl)-3-(prop-2-yn-1-yl)-1H-imidazol-3-ium	chloride	0.997432	-8.16484
C0097	A0039	1-(prop-2-en-1-yl)-3-(prop-2-yn-1-yl)-1H-imidazol-3-ium	(2E)-3-carboxyprop-2-enoate	0.729849	-4.4192
C0097	A0044	1-(prop-2-en-1-yl)-3-(prop-2-yn-1-yl)-1H-imidazol-3-ium	methyl sulfate	0.592745	-1.57156
C0097	A0047	1-(prop-2-en-1-yl)-3-(prop-2-yn-1-yl)-1H-imidazol-3-ium	(2E)-but-2-enoate	0.897236	-11.9786
C0097	A0050	1-(prop-2-en-1-yl)-3-(prop-2-yn-1-yl)-1H-imidazol-3-ium	butyl sulfate	0.651314	-2.30655
C0097	A0051	1-(prop-2-en-1-yl)-3-(prop-2-yn-1-yl)-1H-imidazol-3-ium	perchlorate	0.335865	3.63672
C0097	A0054	1-(prop-2-en-1-yl)-3-(prop-2-yn-1-yl)-1H-imidazol-3-ium	methanesulfonate	0.714831	-4.66868
C0097	A0062	1-(prop-2-en-1-yl)-3-(prop-2-yn-1-yl)-1H-imidazol-3-ium	nitrite	0.665364	-6.14772
C0097	A0063	1-(prop-2-en-1-yl)-3-(prop-2-yn-1-yl)-1H-imidazol-3-ium	dinitroazanide	0.349321	2.18151
C0097	A0064	1-(prop-2-en-1-yl)-3-(prop-2-yn-1-yl)-1H-imidazol-3-ium	trifluoroacetate	0.482649	-4.47287
C0097	A0070	1-(prop-2-en-1-yl)-3-(prop-2-yn-1-yl)-1H-imidazol-3-ium	hydrogen carbonate	0.798446	-7.33035
C0097	A0077	1-(prop-2-en-1-yl)-3-(prop-2-yn-1-yl)-1H-imidazol-3-ium	pentyl sulfate	0.665545	-2.38246
C0097	A0081	1-(prop-2-en-1-yl)-3-(prop-2-yn-1-yl)-1H-imidazol-3-ium	(2S)-2-hydroxypropanoate	0.6682	-7.8525
C0097	A0083	1-(prop-2-en-1-yl)-3-(prop-2-yn-1-yl)-1H-imidazol-3-ium	ethyl sulfate	0.622583	-2.02965
C0097	A0084	1-(prop-2-en-1-yl)-3-(prop-2-yn-1-yl)-1H-imidazol-3-ium	trifluoromethanesulfonate	0.37664	0.61233
C0097	A0087	1-(prop-2-en-1-yl)-3-(prop-2-yn-1-yl)-1H-imidazol-3-ium	acetate	0.898743	-12.7664
C0097	A0089	1-(prop-2-en-1-yl)-3-(prop-2-yn-1-yl)-1H-imidazol-3-ium	2-chloroacetate	0.77278	-8.9276
C0097	A0090	1-(prop-2-en-1-yl)-3-(prop-2-yn-1-yl)-1H-imidazol-3-ium	nitrooxidane	0.52503	-2.43281
C0097	A0091	1-(prop-2-en-1-yl)-3-(prop-2-yn-1-yl)-1H-imidazol-3-ium	diethyl phosphate	0.803933	-8.88259
C0097	A0092	1-(prop-2-en-1-yl)-3-(prop-2-yn-1-yl)-1H-imidazol-3-ium	dibutyl phosphate	0.845853	-8.96059
C0097	A0093	1-(prop-2-en-1-yl)-3-(prop-2-yn-1-yl)-1H-imidazol-3-ium	sulfamate	0.677543	-3.31429
C0097	A0094	1-(prop-2-en-1-yl)-3-(prop-2-yn-1-yl)-1H-imidazol-3-ium	pyridine-4-carboxylate	0.766764	-8.55432
C0097	A0095	1-(prop-2-en-1-yl)-3-(prop-2-yn-1-yl)-1H-imidazol-3-ium	pyridine-3-carboxylate	0.783035	-8.9706
C0097	A0097	1-(prop-2-en-1-yl)-3-(prop-2-yn-1-yl)-1H-imidazol-3-ium	O-(difluorophosphoryl)oxidanidolate	0.471531	-3.09924
C0097	A0103	1-(prop-2-en-1-yl)-3-(prop-2-yn-1-yl)-1H-imidazol-3-ium	ethanesulfonate	0.703676	-4.89923
C0097	A0104	1-(prop-2-en-1-yl)-3-(prop-2-yn-1-yl)-1H-imidazol-3-ium	propane-1-sulfonate	0.712264	-4.99111
C0097	A0105	1-(prop-2-en-1-yl)-3-(prop-2-yn-1-yl)-1H-imidazol-3-ium	butane-1-sulfonate	0.723781	-5.08983
C0097	A0106	1-(prop-2-en-1-yl)-3-(prop-2-yn-1-yl)-1H-imidazol-3-ium	hexane-1-sulfonate	0.744116	-5.18059
C0097	A0107	1-(prop-2-en-1-yl)-3-(prop-2-yn-1-yl)-1H-imidazol-3-ium	hydrogen oxalate	0.622903	-2.24011
C0097	A0120	1-(prop-2-en-1-yl)-3-(prop-2-yn-1-yl)-1H-imidazol-3-ium	2-hydroxyacetate	0.680448	-7.64163
C0097	A0121	1-(prop-2-en-1-yl)-3-(prop-2-yn-1-yl)-1H-imidazol-3-ium	(2R)-2-hydroxypropanoate	0.667094	-7.77948
C0097	A0123	1-(prop-2-en-1-yl)-3-(prop-2-yn-1-yl)-1H-imidazol-3-ium	bis[(2R)-2,4,4-trimethylpentyl]phosphinate	0.733604	-12.1744
C0097	A0136	1-(prop-2-en-1-yl)-3-(prop-2-yn-1-yl)-1H-imidazol-3-ium	cyclohexanecarboxylate	0.86102	-12.9303
C0097	A0137	1-(prop-2-en-1-yl)-3-(prop-2-yn-1-yl)-1H-imidazol-3-ium	2-cyclopentylacetate	0.86938	-12.8622
C0097	A0138	1-(prop-2-en-1-yl)-3-(prop-2-yn-1-yl)-1H-imidazol-3-ium	cyclopentanecarboxylate	0.85998	-12.734
C0097	A0145	1-(prop-2-en-1-yl)-3-(prop-2-yn-1-yl)-1H-imidazol-3-ium	2-hydroxybenzoate	0.604437	-4.87488
C0097	A0152	1-(prop-2-en-1-yl)-3-(prop-2-yn-1-yl)-1H-imidazol-3-ium	benzenolate	0.737612	-9.75976
C0097	A0153	1-(prop-2-en-1-yl)-3-(prop-2-yn-1-yl)-1H-imidazol-3-ium	4-methylbenzen-1-olate	0.772929	-10.6101
C0097	A0154	1-(prop-2-en-1-yl)-3-(prop-2-yn-1-yl)-1H-imidazol-3-ium	4-methoxybenzen-1-olate	0.772757	-10.2575
C0097	A0155	1-(prop-2-en-1-yl)-3-(prop-2-yn-1-yl)-1H-imidazol-3-ium	4-fluorobenzen-1-olate	0.687745	-9.72203
C0097	A0157	1-(prop-2-en-1-yl)-3-(prop-2-yn-1-yl)-1H-imidazol-3-ium	butanoate	0.888109	-12.8529
C0097	A0158	1-(prop-2-en-1-yl)-3-(prop-2-yn-1-yl)-1H-imidazol-3-ium	hexanoate	0.905598	-12.9405
C0097	A0161	1-(prop-2-en-1-yl)-3-(prop-2-yn-1-yl)-1H-imidazol-3-ium	2,2-dimethylpropanoate	0.817847	-12.5331
C0097	A0163	1-(prop-2-en-1-yl)-3-(prop-2-yn-1-yl)-1H-imidazol-3-ium	ethanethioate	0.726885	-4.31547
C0097	A0173	1-(prop-2-en-1-yl)-3-(prop-2-yn-1-yl)-1H-imidazol-3-ium	(2E)-but-2-enoate	0.895753	-11.9605
C0097	A0175	1-(prop-2-en-1-yl)-3-(prop-2-yn-1-yl)-1H-imidazol-3-ium	2-methylbenzene-1-sulfonate	0.656566	-2.96963
C0097	A0179	1-(prop-2-en-1-yl)-3-(prop-2-yn-1-yl)-1H-imidazol-3-ium	1H-1,3-benzodiazol-1-ide	0.637391	-7.95612
C0097	A0189	1-(prop-2-en-1-yl)-3-(prop-2-yn-1-yl)-1H-imidazol-3-ium	dimethyl phosphate	0.836175	-8.48441
C0097	A0194	1-(prop-2-en-1-yl)-3-(prop-2-yn-1-yl)-1H-imidazol-3-ium	2-methylpropanoate	0.856877	-12.5867
C0097	A0195	1-(prop-2-en-1-yl)-3-(prop-2-yn-1-yl)-1H-imidazol-3-ium	4-oxopentanoate	0.916039	-11.8861
C0097	A0197	1-(prop-2-en-1-yl)-3-(prop-2-yn-1-yl)-1H-imidazol-3-ium	methyl phosphonate	0.804977	-9.19482
C0097	A0199	1-(prop-2-en-1-yl)-3-(prop-2-yn-1-yl)-1H-imidazol-3-ium	propanoate	0.880876	-12.7488
C0097	A0202	1-(prop-2-en-1-yl)-3-(prop-2-yn-1-yl)-1H-imidazol-3-ium	2-aminoethane-1-sulfonate	0.751356	-5.85284
C0097	A0205	1-(prop-2-en-1-yl)-3-(prop-2-yn-1-yl)-1H-imidazol-3-ium	1H-1,2,3-triazol-1-ide	0.722471	-8.39104
C0097	A0206	1-(prop-2-en-1-yl)-3-(prop-2-yn-1-yl)-1H-imidazol-3-ium	1H-1,2,3,4-tetrazol-5-ide	0.751173	-8.87348
C0097	A0208	1-(prop-2-en-1-yl)-3-(prop-2-yn-1-yl)-1H-imidazol-3-ium	2-fluorobenzen-1-olate	0.659403	-8.33015
C0097	A0210	1-(prop-2-en-1-yl)-3-(prop-2-yn-1-yl)-1H-imidazol-3-ium	2,2,2-trifluoroethan-1-olate	0.782869	-15.9825
C0097	A0212	1-(prop-2-en-1-yl)-3-(prop-2-yn-1-yl)-1H-imidazol-3-ium	2-oxopyrrolidin-1-ide	0.959793	-15.2563
C0097	A0235	1-(prop-2-en-1-yl)-3-(prop-2-yn-1-yl)-1H-imidazol-3-ium	4-chlorobenzen-1-olate	0.712551	-8.81545
C0097	A0237	1-(prop-2-en-1-yl)-3-(prop-2-yn-1-yl)-1H-imidazol-3-ium	3-chlorobenzen-1-olate	0.690816	-8.11747
C0097	A0239	1-(prop-2-en-1-yl)-3-(prop-2-yn-1-yl)-1H-imidazol-3-ium	2,4-dichlorobenzen-1-olate	0.690616	-7.25492
C0097	A0240	1-(prop-2-en-1-yl)-3-(prop-2-yn-1-yl)-1H-imidazol-3-ium	2,4,6-trichlorobenzen-1-olate	0.690074	-5.43059
C0097	A0241	1-(prop-2-en-1-yl)-3-(prop-2-yn-1-yl)-1H-imidazol-3-ium	3-methylbenzen-1-olate	0.76509	-10.3053
C0097	A0242	1-(prop-2-en-1-yl)-3-(prop-2-yn-1-yl)-1H-imidazol-3-ium	2-methylbenzen-1-olate	0.706298	-9.36779
C0097	A0243	1-(prop-2-en-1-yl)-3-(prop-2-yn-1-yl)-1H-imidazol-3-ium	2,4-dimethylbenzen-1-olate	0.743396	-10.3351
C0097	A0257	1-(prop-2-en-1-yl)-3-(prop-2-yn-1-yl)-1H-imidazol-3-ium	1H-pyrazol-1-ide	0.775049	-10.8215
C0097	A0269	1-(prop-2-en-1-yl)-3-(prop-2-yn-1-yl)-1H-imidazol-3-ium	2-carboxyacetate	0.778929	-5.7013
C0097	A0270	1-(prop-2-en-1-yl)-3-(prop-2-yn-1-yl)-1H-imidazol-3-ium	benzenesulfonate	0.683981	-2.76324
C0097	A0272	1-(prop-2-en-1-yl)-3-(prop-2-yn-1-yl)-1H-imidazol-3-ium	fluoranesulfonate	0.385094	1.96142
C0097	A0273	1-(prop-2-en-1-yl)-3-(prop-2-yn-1-yl)-1H-imidazol-3-ium	2-methoxyacetate	0.897657	-11.0539
C0097	A0278	1-(prop-2-en-1-yl)-3-(prop-2-yn-1-yl)-1H-imidazol-3-ium	hexyl sulfate	0.680148	-2.4162
C0097	A0279	1-(prop-2-en-1-yl)-3-(prop-2-yn-1-yl)-1H-imidazol-3-ium	ethyl phosphonite	0.836912	-10.7689
C0097	A0280	1-(prop-2-en-1-yl)-3-(prop-2-yn-1-yl)-1H-imidazol-3-ium	butyl phosphonite	0.859924	-10.8461
C0097	A0281	1-(prop-2-en-1-yl)-3-(prop-2-yn-1-yl)-1H-imidazol-3-ium	hexyl phosphonite	0.881785	-10.8441
C0097	A0295	1-(prop-2-en-1-yl)-3-(prop-2-yn-1-yl)-1H-imidazol-3-ium	1H-1,2,4-triazol-1-ide	0.714467	-9.05783
C0097	A0296	1-(prop-2-en-1-yl)-3-(prop-2-yn-1-yl)-1H-imidazol-3-ium	1H-1,2,3,4-tetrazol-1-ide	0.609462	-5.15735
C0097	A0307	1-(prop-2-en-1-yl)-3-(prop-2-yn-1-yl)-1H-imidazol-3-ium	(1r,4r)-4-fluorocyclohexan-1-olate	1.06597	-21.2401
C0097	A0317	1-(prop-2-en-1-yl)-3-(prop-2-yn-1-yl)-1H-imidazol-3-ium	pyridin-3-olate	0.69913	-8.67606
C0097	A0320	1-(prop-2-en-1-yl)-3-(prop-2-yn-1-yl)-1H-imidazol-3-ium	hydrogen phosphonate	0.846463	-7.46278
C0097	A0391	1-(prop-2-en-1-yl)-3-(prop-2-yn-1-yl)-1H-imidazol-3-ium	4-methyl-1H-imidazol-1-ide	0.713617	-10.6216
C0097	A0412	1-(prop-2-en-1-yl)-3-(prop-2-yn-1-yl)-1H-imidazol-3-ium	hydrogen ethylphosphonate	0.903049	-9.595
C0097	A0419	1-(prop-2-en-1-yl)-3-(prop-2-yn-1-yl)-1H-imidazol-3-ium	ethyl phosphonate	0.824891	-9.06893
C0097	A0420	1-(prop-2-en-1-yl)-3-(prop-2-yn-1-yl)-1H-imidazol-3-ium	butyl phosphonate	0.840169	-9.1391
C0097	A0457	1-(prop-2-en-1-yl)-3-(prop-2-yn-1-yl)-1H-imidazol-3-ium	hydrogen methylphosphonate	0.935517	-9.66005
C0108	A0012	2-methyl-1-(2-oxopropyl)pyridin-1-ium	dihydrogen phosphate	0.925533	-8.74804
C0108	A0017	2-methyl-1-(2-oxopropyl)pyridin-1-ium	hydrogen sulfate	0.597264	-2.02825
C0108	A0024	2-methyl-1-(2-oxopropyl)pyridin-1-ium	formate	0.890473	-14.2319
C0108	A0030	2-methyl-1-(2-oxopropyl)pyridin-1-ium	4-methylbenzene-1-sulfonate	0.721999	-4.50899
C0108	A0031	2-methyl-1-(2-oxopropyl)pyridin-1-ium	benzoate	0.829956	-12.832
C0108	A0033	2-methyl-1-(2-oxopropyl)pyridin-1-ium	chloride	1.10624	-12.4138
C0108	A0039	2-methyl-1-(2-oxopropyl)pyridin-1-ium	(2E)-3-carboxyprop-2-enoate	0.734731	-6.3682
C0108	A0044	2-methyl-1-(2-oxopropyl)pyridin-1-ium	methyl sulfate	0.622893	-3.26083
C0108	A0047	2-methyl-1-(2-oxopropyl)pyridin-1-ium	(2E)-but-2-enoate	0.941913	-15.4373
C0108	A0050	2-methyl-1-(2-oxopropyl)pyridin-1-ium	butyl sulfate	0.669585	-3.40044
C0108	A0051	2-methyl-1-(2-oxopropyl)pyridin-1-ium	perchlorate	0.312939	3.17466
C0108	A0054	2-methyl-1-(2-oxopropyl)pyridin-1-ium	methanesulfonate	0.770908	-7.08947
C0108	A0062	2-methyl-1-(2-oxopropyl)pyridin-1-ium	nitrite	0.739805	-9.93262
C0108	A0063	2-methyl-1-(2-oxopropyl)pyridin-1-ium	dinitroazanide	0.302338	2.05411
C0108	A0064	2-methyl-1-(2-oxopropyl)pyridin-1-ium	trifluoroacetate	0.465836	-5.99656
C0108	A0070	2-methyl-1-(2-oxopropyl)pyridin-1-ium	hydrogen carbonate	0.865922	-10.9239
C0108	A0077	2-methyl-1-(2-oxopropyl)pyridin-1-ium	pentyl sulfate	0.682659	-3.39102
C0108	A0081	2-methyl-1-(2-oxopropyl)pyridin-1-ium	(2S)-2-hydroxypropanoate	0.69009	-10.406
C0108	A0083	2-methyl-1-(2-oxopropyl)pyridin-1-ium	ethyl sulfate	0.647868	-3.45939
C0108	A0084	2-methyl-1-(2-oxopropyl)pyridin-1-ium	trifluoromethanesulfonate	0.334605	0.35653
C0108	A0087	2-methyl-1-(2-oxopropyl)pyridin-1-ium	acetate	0.955875	-16.7671
C0108	A0089	2-methyl-1-(2-oxopropyl)pyridin-1-ium	2-chloroacetate	0.804604	-11.8477
C0108	A0090	2-methyl-1-(2-oxopropyl)pyridin-1-ium	nitrooxidane	0.566289	-5.03643
C0108	A0091	2-methyl-1-(2-oxopropyl)pyridin-1-ium	diethyl phosphate	0.835761	-11.1406
C0108	A0092	2-methyl-1-(2-oxopropyl)pyridin-1-ium	dibutyl phosphate	0.88011	-10.9915
C0108	A0093	2-methyl-1-(2-oxopropyl)pyridin-1-ium	sulfamate	0.737552	-5.9292
C0108	A0094	2-methyl-1-(2-oxopropyl)pyridin-1-ium	pyridine-4-carboxylate	0.780681	-11.1582
C0108	A0095	2-methyl-1-(2-oxopropyl)pyridin-1-ium	pyridine-3-carboxylate	0.799541	-11.674
C0108	A0097	2-methyl-1-(2-oxopropyl)pyridin-1-ium	O-(difluorophosphoryl)oxidanidolate	0.4656	-4.61187
C0108	A0103	2-methyl-1-(2-oxopropyl)pyridin-1-ium	ethanesulfonate	0.747495	-6.95122
C0108	A0104	2-methyl-1-(2-oxopropyl)pyridin-1-ium	propane-1-sulfonate	0.750783	-6.78977
C0108	A0105	2-methyl-1-(2-oxopropyl)pyridin-1-ium	butane-1-sulfonate	0.759621	-6.72956
C0108	A0106	2-methyl-1-(2-oxopropyl)pyridin-1-ium	hexane-1-sulfonate	0.777939	-6.62821
C0108	A0107	2-methyl-1-(2-oxopropyl)pyridin-1-ium	hydrogen oxalate	0.646705	-4.41986
C0108	A0120	2-methyl-1-(2-oxopropyl)pyridin-1-ium	2-hydroxyacetate	0.715251	-10.5318
C0108	A0121	2-methyl-1-(2-oxopropyl)pyridin-1-ium	(2R)-2-hydroxypropanoate	0.689224	-10.3234
C0108	A0123	2-methyl-1-(2-oxopropyl)pyridin-1-ium	bis[(2R)-2,4,4-trimethylpentyl]phosphinate	0.746979	-14.9955
C0108	A0136	2-methyl-1-(2-oxopropyl)pyridin-1-ium	cyclohexanecarboxylate	0.893207	-16.1261
C0108	A0137	2-methyl-1-(2-oxopropyl)pyridin-1-ium	2-cyclopentylacetate	0.902055	-16.0078
C0108	A0138	2-methyl-1-(2-oxopropyl)pyridin-1-ium	cyclopentanecarboxylate	0.890628	-15.9511
C0108	A0145	2-methyl-1-(2-oxopropyl)pyridin-1-ium	2-hydroxybenzoate	0.578675	-6.471
C0108	A0152	2-methyl-1-(2-oxopropyl)pyridin-1-ium	benzenolate	0.736436	-12.5424
C0108	A0153	2-methyl-1-(2-oxopropyl)pyridin-1-ium	4-methylbenzen-1-olate	0.770139	-13.4277
C0108	A0154	2-methyl-1-(2-oxopropyl)pyridin-1-ium	4-methoxybenzen-1-olate	0.774109	-13.0458
C0108	A0155	2-methyl-1-(2-oxopropyl)pyridin-1-ium	4-fluorobenzen-1-olate	0.668122	-12.2852
C0108	A0157	2-methyl-1-(2-oxopropyl)pyridin-1-ium	butanoate	0.925354	-16.2673
C0108	A0158	2-methyl-1-(2-oxopropyl)pyridin-1-ium	hexanoate	0.940718	-16.113
C0108	A0161	2-methyl-1-(2-oxopropyl)pyridin-1-ium	2,2-dimethylpropanoate	0.837607	-15.7317
C0108	A0163	2-methyl-1-(2-oxopropyl)pyridin-1-ium	ethanethioate	0.760663	-6.49357
C0108	A0173	2-methyl-1-(2-oxopropyl)pyridin-1-ium	(2E)-but-2-enoate	0.940385	-15.4145
C0108	A0175	2-methyl-1-(2-oxopropyl)pyridin-1-ium	2-methylbenzene-1-sulfonate	0.65785	-4.1638
C0108	A0179	2-methyl-1-(2-oxopropyl)pyridin-1-ium	1H-1,3-benzodiazol-1-ide	0.623346	-10.1345
C0108	A0189	2-methyl-1-(2-oxopropyl)pyridin-1-ium	dimethyl phosphate	0.887483	-11.0691
C0108	A0194	2-methyl-1-(2-oxopropyl)pyridin-1-ium	2-methylpropanoate	0.889102	-15.948
C0108	A0195	2-methyl-1-(2-oxopropyl)pyridin-1-ium	4-oxopentanoate	0.967998	-15.1386
C0108	A0197	2-methyl-1-(2-oxopropyl)pyridin-1-ium	methyl phosphonate	0.850123	-12.0591
C0108	A0199	2-methyl-1-(2-oxopropyl)pyridin-1-ium	propanoate	0.922399	-16.3616
C0108	A0202	2-methyl-1-(2-oxopropyl)pyridin-1-ium	2-aminoethane-1-sulfonate	0.803575	-8.05577
C0108	A0205	2-methyl-1-(2-oxopropyl)pyridin-1-ium	1H-1,2,3-triazol-1-ide	0.775246	-11.5238
C0108	A0206	2-methyl-1-(2-oxopropyl)pyridin-1-ium	1H-1,2,3,4-tetrazol-5-ide	0.812654	-12.5196
C0108	A0208	2-methyl-1-(2-oxopropyl)pyridin-1-ium	2-fluorobenzen-1-olate	0.641968	-10.6468
C0108	A0210	2-methyl-1-(2-oxopropyl)pyridin-1-ium	2,2,2-trifluoroethan-1-olate	0.770958	-19.9215
C0108	A0212	2-methyl-1-(2-oxopropyl)pyridin-1-ium	2-oxopyrrolidin-1-ide	0.999314	-19.1219
C0108	A0235	2-methyl-1-(2-oxopropyl)pyridin-1-ium	4-chlorobenzen-1-olate	0.67969	-11.0298
C0108	A0237	2-methyl-1-(2-oxopropyl)pyridin-1-ium	3-chlorobenzen-1-olate	0.65438	-10.1507
C0108	A0239	2-methyl-1-(2-oxopropyl)pyridin-1-ium	2,4-dichlorobenzen-1-olate	0.634917	-8.93928
C0108	A0240	2-methyl-1-(2-oxopropyl)pyridin-1-ium	2,4,6-trichlorobenzen-1-olate	0.6196	-6.61563
C0108	A0241	2-methyl-1-(2-oxopropyl)pyridin-1-ium	3-methylbenzen-1-olate	0.764015	-13.0772
C0108	A0242	2-methyl-1-(2-oxopropyl)pyridin-1-ium	2-methylbenzen-1-olate	0.689849	-11.8546
C0108	A0243	2-methyl-1-(2-oxopropyl)pyridin-1-ium	2,4-dimethylbenzen-1-olate	0.727106	-12.9535
C0108	A0257	2-methyl-1-(2-oxopropyl)pyridin-1-ium	1H-pyrazol-1-ide	0.817423	-14.3066
C0108	A0269	2-methyl-1-(2-oxopropyl)pyridin-1-ium	2-carboxyacetate	0.811843	-8.24837
C0108	A0270	2-methyl-1-(2-oxopropyl)pyridin-1-ium	benzenesulfonate	0.694829	-4.09248
C0108	A0272	2-methyl-1-(2-oxopropyl)pyridin-1-ium	fluoranesulfonate	0.367894	1.24802
C0108	A0273	2-methyl-1-(2-oxopropyl)pyridin-1-ium	2-methoxyacetate	0.956907	-14.3449
C0108	A0278	2-methyl-1-(2-oxopropyl)pyridin-1-ium	hexyl sulfate	0.697107	-3.36326
C0108	A0279	2-methyl-1-(2-oxopropyl)pyridin-1-ium	ethyl phosphonite	0.865278	-13.7939
C0108	A0280	2-methyl-1-(2-oxopropyl)pyridin-1-ium	butyl phosphonite	0.882699	-13.5607
C0108	A0281	2-methyl-1-(2-oxopropyl)pyridin-1-ium	hexyl phosphonite	0.903834	-13.4308
C0108	A0295	2-methyl-1-(2-oxopropyl)pyridin-1-ium	1H-1,2,4-triazol-1-ide	0.762314	-12.3007
C0108	A0296	2-methyl-1-(2-oxopropyl)pyridin-1-ium	1H-1,2,3,4-tetrazol-1-ide	0.658398	-7.87281
C0108	A0307	2-methyl-1-(2-oxopropyl)pyridin-1-ium	(1r,4r)-4-fluorocyclohexan-1-olate	1.07494	-26.2878
C0108	A0317	2-methyl-1-(2-oxopropyl)pyridin-1-ium	pyridin-3-olate	0.700686	-11.1826
C0108	A0320	2-methyl-1-(2-oxopropyl)pyridin-1-ium	hydrogen phosphonate	0.903216	-10.7148
C0108	A0391	2-methyl-1-(2-oxopropyl)pyridin-1-ium	4-methyl-1H-imidazol-1-ide	0.73233	-13.6213
C0108	A0412	2-methyl-1-(2-oxopropyl)pyridin-1-ium	hydrogen ethylphosphonate	0.947736	-12.4472
C0108	A0419	2-methyl-1-(2-oxopropyl)pyridin-1-ium	ethyl phosphonate	0.867884	-11.6509
C0108	A0420	2-methyl-1-(2-oxopropyl)pyridin-1-ium	butyl phosphonate	0.877025	-11.3989
C0108	A0457	2-methyl-1-(2-oxopropyl)pyridin-1-ium	hydrogen methylphosphonate	0.993563	-12.8749
C0109	A0012	1-[(1E)-2-carboxyeth-1-en-1-yl]pyridin-1-ium	dihydrogen phosphate	0.832711	-2.22055
C0109	A0017	1-[(1E)-2-carboxyeth-1-en-1-yl]pyridin-1-ium	hydrogen sulfate	0.503139	3.38487
C0109	A0024	1-[(1E)-2-carboxyeth-1-en-1-yl]pyridin-1-ium	formate	0.810583	-5.77551
C0109	A0030	1-[(1E)-2-carboxyeth-1-en-1-yl]pyridin-1-ium	4-methylbenzene-1-sulfonate	0.674373	-0.92323
C0109	A0031	1-[(1E)-2-carboxyeth-1-en-1-yl]pyridin-1-ium	benzoate	0.799749	-4.25642
C0109	A0033	1-[(1E)-2-carboxyeth-1-en-1-yl]pyridin-1-ium	chloride	0.97789	-6.2031
C0109	A0039	1-[(1E)-2-carboxyeth-1-en-1-yl]pyridin-1-ium	(2E)-3-carboxyprop-2-enoate	0.681083	-0.21479
C0109	A0044	1-[(1E)-2-carboxyeth-1-en-1-yl]pyridin-1-ium	methyl sulfate	0.54392	1.07016
C0109	A0047	1-[(1E)-2-carboxyeth-1-en-1-yl]pyridin-1-ium	(2E)-but-2-enoate	0.889018	-6.63673
C0109	A0050	1-[(1E)-2-carboxyeth-1-en-1-yl]pyridin-1-ium	butyl sulfate	0.617976	-0.57773
C0109	A0051	1-[(1E)-2-carboxyeth-1-en-1-yl]pyridin-1-ium	perchlorate	0.233666	4.176
C0109	A0054	1-[(1E)-2-carboxyeth-1-en-1-yl]pyridin-1-ium	methanesulfonate	0.680097	-1.92534
C0109	A0062	1-[(1E)-2-carboxyeth-1-en-1-yl]pyridin-1-ium	nitrite	0.662078	-1.5046
C0109	A0063	1-[(1E)-2-carboxyeth-1-en-1-yl]pyridin-1-ium	dinitroazanide	0.276766	3.84089
C0109	A0064	1-[(1E)-2-carboxyeth-1-en-1-yl]pyridin-1-ium	trifluoroacetate	0.44032	0.01119
C0109	A0070	1-[(1E)-2-carboxyeth-1-en-1-yl]pyridin-1-ium	hydrogen carbonate	0.777609	-3.59292
C0109	A0077	1-[(1E)-2-carboxyeth-1-en-1-yl]pyridin-1-ium	pentyl sulfate	0.637343	-0.8481
C0109	A0081	1-[(1E)-2-carboxyeth-1-en-1-yl]pyridin-1-ium	(2S)-2-hydroxypropanoate	0.638207	-3.40636
C0109	A0083	1-[(1E)-2-carboxyeth-1-en-1-yl]pyridin-1-ium	ethyl sulfate	0.578892	0.25125
C0109	A0084	1-[(1E)-2-carboxyeth-1-en-1-yl]pyridin-1-ium	trifluoromethanesulfonate	0.325681	2.01809
C0109	A0087	1-[(1E)-2-carboxyeth-1-en-1-yl]pyridin-1-ium	acetate	0.889923	-7.52398
C0109	A0089	1-[(1E)-2-carboxyeth-1-en-1-yl]pyridin-1-ium	2-chloroacetate	0.74301	-3.97037
C0109	A0090	1-[(1E)-2-carboxyeth-1-en-1-yl]pyridin-1-ium	nitrooxidane	0.483546	1.85286
C0109	A0091	1-[(1E)-2-carboxyeth-1-en-1-yl]pyridin-1-ium	diethyl phosphate	0.786043	-5.97935
C0109	A0092	1-[(1E)-2-carboxyeth-1-en-1-yl]pyridin-1-ium	dibutyl phosphate	0.847683	-6.52067
C0109	A0093	1-[(1E)-2-carboxyeth-1-en-1-yl]pyridin-1-ium	sulfamate	0.652219	-0.24936
C0109	A0094	1-[(1E)-2-carboxyeth-1-en-1-yl]pyridin-1-ium	pyridine-4-carboxylate	0.751389	-3.34003
C0109	A0095	1-[(1E)-2-carboxyeth-1-en-1-yl]pyridin-1-ium	pyridine-3-carboxylate	0.767703	-3.63831
C0109	A0097	1-[(1E)-2-carboxyeth-1-en-1-yl]pyridin-1-ium	O-(difluorophosphoryl)oxidanidolate	0.406094	1.07241
C0109	A0103	1-[(1E)-2-carboxyeth-1-en-1-yl]pyridin-1-ium	ethanesulfonate	0.667879	-2.27062
C0109	A0104	1-[(1E)-2-carboxyeth-1-en-1-yl]pyridin-1-ium	propane-1-sulfonate	0.6793	-2.58418
C0109	A0105	1-[(1E)-2-carboxyeth-1-en-1-yl]pyridin-1-ium	butane-1-sulfonate	0.69498	-2.88273
C0109	A0106	1-[(1E)-2-carboxyeth-1-en-1-yl]pyridin-1-ium	hexane-1-sulfonate	0.724249	-3.28563
C0109	A0107	1-[(1E)-2-carboxyeth-1-en-1-yl]pyridin-1-ium	hydrogen oxalate	0.563716	2.21381
C0109	A0120	1-[(1E)-2-carboxyeth-1-en-1-yl]pyridin-1-ium	2-hydroxyacetate	0.647983	-3.08324
C0109	A0121	1-[(1E)-2-carboxyeth-1-en-1-yl]pyridin-1-ium	(2R)-2-hydroxypropanoate	0.636296	-3.35967
C0109	A0123	1-[(1E)-2-carboxyeth-1-en-1-yl]pyridin-1-ium	bis[(2R)-2,4,4-trimethylpentyl]phosphinate	0.782438	-8.70714
C0109	A0136	1-[(1E)-2-carboxyeth-1-en-1-yl]pyridin-1-ium	cyclohexanecarboxylate	0.863345	-8.00878
C0109	A0137	1-[(1E)-2-carboxyeth-1-en-1-yl]pyridin-1-ium	2-cyclopentylacetate	0.873093	-8.02041
C0109	A0138	1-[(1E)-2-carboxyeth-1-en-1-yl]pyridin-1-ium	cyclopentanecarboxylate	0.857746	-7.68481
C0109	A0145	1-[(1E)-2-carboxyeth-1-en-1-yl]pyridin-1-ium	2-hydroxybenzoate	0.572548	-0.31287
C0109	A0152	1-[(1E)-2-carboxyeth-1-en-1-yl]pyridin-1-ium	benzenolate	0.72491	-3.53095
C0109	A0153	1-[(1E)-2-carboxyeth-1-en-1-yl]pyridin-1-ium	4-methylbenzen-1-olate	0.770392	-4.67696
C0109	A0154	1-[(1E)-2-carboxyeth-1-en-1-yl]pyridin-1-ium	4-methoxybenzen-1-olate	0.768115	-4.48766
C0109	A0155	1-[(1E)-2-carboxyeth-1-en-1-yl]pyridin-1-ium	4-fluorobenzen-1-olate	0.671469	-3.42572
C0109	A0157	1-[(1E)-2-carboxyeth-1-en-1-yl]pyridin-1-ium	butanoate	0.881612	-7.66981
C0109	A0158	1-[(1E)-2-carboxyeth-1-en-1-yl]pyridin-1-ium	hexanoate	0.910236	-8.1764
C0109	A0161	1-[(1E)-2-carboxyeth-1-en-1-yl]pyridin-1-ium	2,2-dimethylpropanoate	0.810722	-7.17698
C0109	A0163	1-[(1E)-2-carboxyeth-1-en-1-yl]pyridin-1-ium	ethanethioate	0.69824	0.09652
C0109	A0173	1-[(1E)-2-carboxyeth-1-en-1-yl]pyridin-1-ium	(2E)-but-2-enoate	0.887414	-6.63303
C0109	A0175	1-[(1E)-2-carboxyeth-1-en-1-yl]pyridin-1-ium	2-methylbenzene-1-sulfonate	0.62325	-0.5247
C0109	A0179	1-[(1E)-2-carboxyeth-1-en-1-yl]pyridin-1-ium	1H-1,3-benzodiazol-1-ide	0.643166	-1.1208
C0109	A0189	1-[(1E)-2-carboxyeth-1-en-1-yl]pyridin-1-ium	dimethyl phosphate	0.809511	-5.4677
C0109	A0194	1-[(1E)-2-carboxyeth-1-en-1-yl]pyridin-1-ium	2-methylpropanoate	0.847222	-7.35555
C0109	A0195	1-[(1E)-2-carboxyeth-1-en-1-yl]pyridin-1-ium	4-oxopentanoate	0.904172	-6.95281
C0109	A0197	1-[(1E)-2-carboxyeth-1-en-1-yl]pyridin-1-ium	methyl phosphonate	0.774893	-5.91739
C0109	A0199	1-[(1E)-2-carboxyeth-1-en-1-yl]pyridin-1-ium	propanoate	0.869237	-7.46666
C0109	A0202	1-[(1E)-2-carboxyeth-1-en-1-yl]pyridin-1-ium	2-aminoethane-1-sulfonate	0.733008	-2.54857
C0109	A0205	1-[(1E)-2-carboxyeth-1-en-1-yl]pyridin-1-ium	1H-1,2,3-triazol-1-ide	0.72223	-2.88872
C0109	A0206	1-[(1E)-2-carboxyeth-1-en-1-yl]pyridin-1-ium	1H-1,2,3,4-tetrazol-5-ide	0.773128	-1.70278
C0109	A0208	1-[(1E)-2-carboxyeth-1-en-1-yl]pyridin-1-ium	2-fluorobenzen-1-olate	0.641103	-2.34971
C0109	A0210	1-[(1E)-2-carboxyeth-1-en-1-yl]pyridin-1-ium	2,2,2-trifluoroethan-1-olate	0.770025	-8.38704
C0109	A0212	1-[(1E)-2-carboxyeth-1-en-1-yl]pyridin-1-ium	2-oxopyrrolidin-1-ide	0.958402	-9.80746
C0109	A0235	1-[(1E)-2-carboxyeth-1-en-1-yl]pyridin-1-ium	4-chlorobenzen-1-olate	0.699943	-2.99704
C0109	A0237	1-[(1E)-2-carboxyeth-1-en-1-yl]pyridin-1-ium	3-chlorobenzen-1-olate	0.67774	-2.47621
C0109	A0239	1-[(1E)-2-carboxyeth-1-en-1-yl]pyridin-1-ium	2,4-dichlorobenzen-1-olate	0.690832	-2.0644
C0109	A0240	1-[(1E)-2-carboxyeth-1-en-1-yl]pyridin-1-ium	2,4,6-trichlorobenzen-1-olate	0.706661	-1.28586
C0109	A0241	1-[(1E)-2-carboxyeth-1-en-1-yl]pyridin-1-ium	3-methylbenzen-1-olate	0.761997	-4.4182
C0109	A0242	1-[(1E)-2-carboxyeth-1-en-1-yl]pyridin-1-ium	2-methylbenzen-1-olate	0.703739	-3.35391
C0109	A0243	1-[(1E)-2-carboxyeth-1-en-1-yl]pyridin-1-ium	2,4-dimethylbenzen-1-olate	0.751653	-4.52265
C0109	A0257	1-[(1E)-2-carboxyeth-1-en-1-yl]pyridin-1-ium	1H-pyrazol-1-ide	0.770649	-4.3168
C0109	A0269	1-[(1E)-2-carboxyeth-1-en-1-yl]pyridin-1-ium	2-carboxyacetate	0.736238	-1.33917
C0109	A0270	1-[(1E)-2-carboxyeth-1-en-1-yl]pyridin-1-ium	benzenesulfonate	0.643081	-0.15715
C0109	A0272	1-[(1E)-2-carboxyeth-1-en-1-yl]pyridin-1-ium	fluoranesulfonate	0.300238	4.44616
C0109	A0273	1-[(1E)-2-carboxyeth-1-en-1-yl]pyridin-1-ium	2-methoxyacetate	0.887482	-6.76554
C0109	A0278	1-[(1E)-2-carboxyeth-1-en-1-yl]pyridin-1-ium	hexyl sulfate	0.656807	-1.0517
C0109	A0279	1-[(1E)-2-carboxyeth-1-en-1-yl]pyridin-1-ium	ethyl phosphonite	0.81758	-6.17386
C0109	A0280	1-[(1E)-2-carboxyeth-1-en-1-yl]pyridin-1-ium	butyl phosphonite	0.853023	-6.73964
C0109	A0281	1-[(1E)-2-carboxyeth-1-en-1-yl]pyridin-1-ium	hexyl phosphonite	0.886997	-7.03952
C0109	A0295	1-[(1E)-2-carboxyeth-1-en-1-yl]pyridin-1-ium	1H-1,2,4-triazol-1-ide	0.716389	-3.26583
C0109	A0296	1-[(1E)-2-carboxyeth-1-en-1-yl]pyridin-1-ium	1H-1,2,3,4-tetrazol-1-ide	0.610952	0.21183
C0109	A0307	1-[(1E)-2-carboxyeth-1-en-1-yl]pyridin-1-ium	(1r,4r)-4-fluorocyclohexan-1-olate	1.08112	-13.5581
C0109	A0317	1-[(1E)-2-carboxyeth-1-en-1-yl]pyridin-1-ium	pyridin-3-olate	0.68495	-3.13491
C0109	A0320	1-[(1E)-2-carboxyeth-1-en-1-yl]pyridin-1-ium	hydrogen phosphonate	0.812891	-4.10615
C0109	A0391	1-[(1E)-2-carboxyeth-1-en-1-yl]pyridin-1-ium	4-methyl-1H-imidazol-1-ide	0.722154	-3.7626
C0109	A0412	1-[(1E)-2-carboxyeth-1-en-1-yl]pyridin-1-ium	hydrogen ethylphosphonate	0.876693	-6.35462
C0109	A0419	1-[(1E)-2-carboxyeth-1-en-1-yl]pyridin-1-ium	ethyl phosphonate	0.797152	-6.08447
C0109	A0420	1-[(1E)-2-carboxyeth-1-en-1-yl]pyridin-1-ium	butyl phosphonate	0.822001	-6.49626
C0109	A0457	1-[(1E)-2-carboxyeth-1-en-1-yl]pyridin-1-ium	hydrogen methylphosphonate	0.910934	-6.42213
C0131	A0012	4-methyl-1-(prop-2-yn-1-yl)pyridin-1-ium	dihydrogen phosphate	0.88807	-6.35807
C0131	A0017	4-methyl-1-(prop-2-yn-1-yl)pyridin-1-ium	hydrogen sulfate	0.583629	-0.511
C0131	A0024	4-methyl-1-(prop-2-yn-1-yl)pyridin-1-ium	formate	0.845717	-11.2364
C0131	A0030	4-methyl-1-(prop-2-yn-1-yl)pyridin-1-ium	4-methylbenzene-1-sulfonate	0.715803	-3.64674
C0131	A0031	4-methyl-1-(prop-2-yn-1-yl)pyridin-1-ium	benzoate	0.82072	-10.6401
C0131	A0033	4-methyl-1-(prop-2-yn-1-yl)pyridin-1-ium	chloride	1.03091	-9.35922
C0131	A0039	4-methyl-1-(prop-2-yn-1-yl)pyridin-1-ium	(2E)-3-carboxyprop-2-enoate	0.734278	-4.86689
C0131	A0044	4-methyl-1-(prop-2-yn-1-yl)pyridin-1-ium	methyl sulfate	0.611832	-2.14387
C0131	A0047	4-methyl-1-(prop-2-yn-1-yl)pyridin-1-ium	(2E)-but-2-enoate	0.909416	-12.8443
C0131	A0050	4-methyl-1-(prop-2-yn-1-yl)pyridin-1-ium	butyl sulfate	0.660891	-2.74745
C0131	A0051	4-methyl-1-(prop-2-yn-1-yl)pyridin-1-ium	perchlorate	0.336441	3.58321
C0131	A0054	4-methyl-1-(prop-2-yn-1-yl)pyridin-1-ium	methanesulfonate	0.739514	-5.45503
C0131	A0062	4-methyl-1-(prop-2-yn-1-yl)pyridin-1-ium	nitrite	0.697748	-7.21135
C0131	A0063	4-methyl-1-(prop-2-yn-1-yl)pyridin-1-ium	dinitroazanide	0.340282	2.21949
C0131	A0064	4-methyl-1-(prop-2-yn-1-yl)pyridin-1-ium	trifluoroacetate	0.477592	-4.87348
C0131	A0070	4-methyl-1-(prop-2-yn-1-yl)pyridin-1-ium	hydrogen carbonate	0.824657	-8.26537
C0131	A0077	4-methyl-1-(prop-2-yn-1-yl)pyridin-1-ium	pentyl sulfate	0.673339	-2.80038
C0131	A0081	4-methyl-1-(prop-2-yn-1-yl)pyridin-1-ium	(2S)-2-hydroxypropanoate	0.675799	-8.57974
C0131	A0083	4-methyl-1-(prop-2-yn-1-yl)pyridin-1-ium	ethyl sulfate	0.63797	-2.54927
C0131	A0084	4-methyl-1-(prop-2-yn-1-yl)pyridin-1-ium	trifluoromethanesulfonate	0.365464	0.52405
C0131	A0087	4-methyl-1-(prop-2-yn-1-yl)pyridin-1-ium	acetate	0.914618	-13.7727
C0131	A0089	4-methyl-1-(prop-2-yn-1-yl)pyridin-1-ium	2-chloroacetate	0.783858	-9.71134
C0131	A0090	4-methyl-1-(prop-2-yn-1-yl)pyridin-1-ium	nitrooxidane	0.547514	-3.19019
C0131	A0091	4-methyl-1-(prop-2-yn-1-yl)pyridin-1-ium	diethyl phosphate	0.810256	-9.54592
C0131	A0092	4-methyl-1-(prop-2-yn-1-yl)pyridin-1-ium	dibutyl phosphate	0.847126	-9.56441
C0131	A0093	4-methyl-1-(prop-2-yn-1-yl)pyridin-1-ium	sulfamate	0.704764	-4.06104
C0131	A0094	4-methyl-1-(prop-2-yn-1-yl)pyridin-1-ium	pyridine-4-carboxylate	0.773136	-9.17753
C0131	A0095	4-methyl-1-(prop-2-yn-1-yl)pyridin-1-ium	pyridine-3-carboxylate	0.790389	-9.61999
C0131	A0097	4-methyl-1-(prop-2-yn-1-yl)pyridin-1-ium	O-(difluorophosphoryl)oxidanidolate	0.472646	-3.51495
C0131	A0103	4-methyl-1-(prop-2-yn-1-yl)pyridin-1-ium	ethanesulfonate	0.721221	-5.57472
C0131	A0104	4-methyl-1-(prop-2-yn-1-yl)pyridin-1-ium	propane-1-sulfonate	0.726119	-5.6073
C0131	A0105	4-methyl-1-(prop-2-yn-1-yl)pyridin-1-ium	butane-1-sulfonate	0.735117	-5.66883
C0131	A0106	4-methyl-1-(prop-2-yn-1-yl)pyridin-1-ium	hexane-1-sulfonate	0.751981	-5.71036
C0131	A0107	4-methyl-1-(prop-2-yn-1-yl)pyridin-1-ium	hydrogen oxalate	0.638013	-2.77173
C0131	A0120	4-methyl-1-(prop-2-yn-1-yl)pyridin-1-ium	2-hydroxyacetate	0.694753	-8.45163
C0131	A0121	4-methyl-1-(prop-2-yn-1-yl)pyridin-1-ium	(2R)-2-hydroxypropanoate	0.674834	-8.50636
C0131	A0123	4-methyl-1-(prop-2-yn-1-yl)pyridin-1-ium	bis[(2R)-2,4,4-trimethylpentyl]phosphinate	0.717541	-12.6916
C0131	A0136	4-methyl-1-(prop-2-yn-1-yl)pyridin-1-ium	cyclohexanecarboxylate	0.860267	-13.7343
C0131	A0137	4-methyl-1-(prop-2-yn-1-yl)pyridin-1-ium	2-cyclopentylacetate	0.868363	-13.6574
C0131	A0138	4-methyl-1-(prop-2-yn-1-yl)pyridin-1-ium	cyclopentanecarboxylate	0.860476	-13.5399
C0131	A0145	4-methyl-1-(prop-2-yn-1-yl)pyridin-1-ium	2-hydroxybenzoate	0.599296	-5.29812
C0131	A0152	4-methyl-1-(prop-2-yn-1-yl)pyridin-1-ium	benzenolate	0.741708	-10.368
C0131	A0153	4-methyl-1-(prop-2-yn-1-yl)pyridin-1-ium	4-methylbenzen-1-olate	0.773737	-11.2045
C0131	A0154	4-methyl-1-(prop-2-yn-1-yl)pyridin-1-ium	4-methoxybenzen-1-olate	0.776516	-10.8857
C0131	A0155	4-methyl-1-(prop-2-yn-1-yl)pyridin-1-ium	4-fluorobenzen-1-olate	0.685035	-10.2551
C0131	A0157	4-methyl-1-(prop-2-yn-1-yl)pyridin-1-ium	butanoate	0.892671	-13.703
C0131	A0158	4-methyl-1-(prop-2-yn-1-yl)pyridin-1-ium	hexanoate	0.905296	-13.7381
C0131	A0161	4-methyl-1-(prop-2-yn-1-yl)pyridin-1-ium	2,2-dimethylpropanoate	0.816029	-13.3109
C0131	A0163	4-methyl-1-(prop-2-yn-1-yl)pyridin-1-ium	ethanethioate	0.744349	-4.91642
C0131	A0173	4-methyl-1-(prop-2-yn-1-yl)pyridin-1-ium	(2E)-but-2-enoate	0.907953	-12.8261
C0131	A0175	4-methyl-1-(prop-2-yn-1-yl)pyridin-1-ium	2-methylbenzene-1-sulfonate	0.659892	-3.33728
C0131	A0179	4-methyl-1-(prop-2-yn-1-yl)pyridin-1-ium	1H-1,3-benzodiazol-1-ide	0.6395	-8.51726
C0131	A0189	4-methyl-1-(prop-2-yn-1-yl)pyridin-1-ium	dimethyl phosphate	0.854092	-9.26459
C0131	A0194	4-methyl-1-(prop-2-yn-1-yl)pyridin-1-ium	2-methylpropanoate	0.860109	-13.419
C0131	A0195	4-methyl-1-(prop-2-yn-1-yl)pyridin-1-ium	4-oxopentanoate	0.933635	-12.8363
C0131	A0197	4-methyl-1-(prop-2-yn-1-yl)pyridin-1-ium	methyl phosphonate	0.819636	-10.0059
C0131	A0199	4-methyl-1-(prop-2-yn-1-yl)pyridin-1-ium	propanoate	0.889116	-13.6404
C0131	A0202	4-methyl-1-(prop-2-yn-1-yl)pyridin-1-ium	2-aminoethane-1-sulfonate	0.774818	-6.59639
C0131	A0205	4-methyl-1-(prop-2-yn-1-yl)pyridin-1-ium	1H-1,2,3-triazol-1-ide	0.745741	-9.14857
C0131	A0206	4-methyl-1-(prop-2-yn-1-yl)pyridin-1-ium	1H-1,2,3,4-tetrazol-5-ide	0.780038	-9.78288
C0131	A0208	4-methyl-1-(prop-2-yn-1-yl)pyridin-1-ium	2-fluorobenzen-1-olate	0.658165	-8.85289
C0131	A0210	4-methyl-1-(prop-2-yn-1-yl)pyridin-1-ium	2,2,2-trifluoroethan-1-olate	0.780327	-16.6309
C0131	A0212	4-methyl-1-(prop-2-yn-1-yl)pyridin-1-ium	2-oxopyrrolidin-1-ide	0.965564	-16.0683
C0131	A0235	4-methyl-1-(prop-2-yn-1-yl)pyridin-1-ium	4-chlorobenzen-1-olate	0.704414	-9.29844
C0131	A0237	4-methyl-1-(prop-2-yn-1-yl)pyridin-1-ium	3-chlorobenzen-1-olate	0.681572	-8.58009
C0131	A0239	4-methyl-1-(prop-2-yn-1-yl)pyridin-1-ium	2,4-dichlorobenzen-1-olate	0.674057	-7.67952
C0131	A0240	4-methyl-1-(prop-2-yn-1-yl)pyridin-1-ium	2,4,6-trichlorobenzen-1-olate	0.667578	-5.79627
C0131	A0241	4-methyl-1-(prop-2-yn-1-yl)pyridin-1-ium	3-methylbenzen-1-olate	0.766833	-10.9078
C0131	A0242	4-methyl-1-(prop-2-yn-1-yl)pyridin-1-ium	2-methylbenzen-1-olate	0.704175	-9.93676
C0131	A0243	4-methyl-1-(prop-2-yn-1-yl)pyridin-1-ium	2,4-dimethylbenzen-1-olate	0.738796	-10.9074
C0131	A0257	4-methyl-1-(prop-2-yn-1-yl)pyridin-1-ium	1H-pyrazol-1-ide	0.793022	-11.6337
C0131	A0269	4-methyl-1-(prop-2-yn-1-yl)pyridin-1-ium	2-carboxyacetate	0.793783	-6.36616
C0131	A0270	4-methyl-1-(prop-2-yn-1-yl)pyridin-1-ium	benzenesulfonate	0.692828	-3.17249
C0131	A0272	4-methyl-1-(prop-2-yn-1-yl)pyridin-1-ium	fluoranesulfonate	0.386822	1.81485
C0131	A0273	4-methyl-1-(prop-2-yn-1-yl)pyridin-1-ium	2-methoxyacetate	0.915679	-11.9702
C0131	A0278	4-methyl-1-(prop-2-yn-1-yl)pyridin-1-ium	hexyl sulfate	0.686605	-2.81588
C0131	A0279	4-methyl-1-(prop-2-yn-1-yl)pyridin-1-ium	ethyl phosphonite	0.845328	-11.5422
C0131	A0280	4-methyl-1-(prop-2-yn-1-yl)pyridin-1-ium	butyl phosphonite	0.862532	-11.5453
C0131	A0281	4-methyl-1-(prop-2-yn-1-yl)pyridin-1-ium	hexyl phosphonite	0.881069	-11.503
C0131	A0295	4-methyl-1-(prop-2-yn-1-yl)pyridin-1-ium	1H-1,2,4-triazol-1-ide	0.737258	-9.83584
C0131	A0296	4-methyl-1-(prop-2-yn-1-yl)pyridin-1-ium	1H-1,2,3,4-tetrazol-1-ide	0.635963	-5.83017
C0131	A0307	4-methyl-1-(prop-2-yn-1-yl)pyridin-1-ium	(1r,4r)-4-fluorocyclohexan-1-olate	1.06565	-21.8899
C0131	A0317	4-methyl-1-(prop-2-yn-1-yl)pyridin-1-ium	pyridin-3-olate	0.703885	-9.21861
C0131	A0320	4-methyl-1-(prop-2-yn-1-yl)pyridin-1-ium	hydrogen phosphonate	0.866275	-8.30418
C0131	A0391	4-methyl-1-(prop-2-yn-1-yl)pyridin-1-ium	4-methyl-1H-imidazol-1-ide	0.723242	-11.3555
C0131	A0412	4-methyl-1-(prop-2-yn-1-yl)pyridin-1-ium	hydrogen ethylphosphonate	0.913184	-10.2989
C0131	A0419	4-methyl-1-(prop-2-yn-1-yl)pyridin-1-ium	ethyl phosphonate	0.83578	-9.81043
C0131	A0420	4-methyl-1-(prop-2-yn-1-yl)pyridin-1-ium	butyl phosphonate	0.845116	-9.7997
C0131	A0457	4-methyl-1-(prop-2-yn-1-yl)pyridin-1-ium	hydrogen methylphosphonate	0.952444	-10.4741
C0137	A0012	1-butyl-1-methylpiperidin-1-ium	dihydrogen phosphate	1.05473	-12.3019
C0137	A0017	1-butyl-1-methylpiperidin-1-ium	hydrogen sulfate	0.734187	-5.04279
C0137	A0024	1-butyl-1-methylpiperidin-1-ium	formate	1.03093	-19.2789
C0137	A0030	1-butyl-1-methylpiperidin-1-ium	4-methylbenzene-1-sulfonate	0.852495	-7.35601
C0137	A0031	1-butyl-1-methylpiperidin-1-ium	benzoate	0.964637	-19.175
C0137	A0033	1-butyl-1-methylpiperidin-1-ium	chloride	1.25032	-15.3507
C0137	A0039	1-butyl-1-methylpiperidin-1-ium	(2E)-3-carboxyprop-2-enoate	0.863116	-10.6451
C0137	A0044	1-butyl-1-methylpiperidin-1-ium	methyl sulfate	0.76425	-6.11356
C0137	A0047	1-butyl-1-methylpiperidin-1-ium	(2E)-but-2-enoate	1.09214	-21.7856
C0137	A0050	1-butyl-1-methylpiperidin-1-ium	butyl sulfate	0.806906	-5.6236
C0137	A0051	1-butyl-1-methylpiperidin-1-ium	perchlorate	0.448643	1.26189
C0137	A0054	1-butyl-1-methylpiperidin-1-ium	methanesulfonate	0.921345	-10.36
C0137	A0062	1-butyl-1-methylpiperidin-1-ium	nitrite	0.87336	-14.3585
C0137	A0063	1-butyl-1-methylpiperidin-1-ium	dinitroazanide	0.415271	-0.27121
C0137	A0064	1-butyl-1-methylpiperidin-1-ium	trifluoroacetate	0.591624	-10.3592
C0137	A0070	1-butyl-1-methylpiperidin-1-ium	hydrogen carbonate	0.998985	-14.9826
C0137	A0077	1-butyl-1-methylpiperidin-1-ium	pentyl sulfate	0.8168	-5.43361
C0137	A0081	1-butyl-1-methylpiperidin-1-ium	(2S)-2-hydroxypropanoate	0.834696	-15.3459
C0137	A0083	1-butyl-1-methylpiperidin-1-ium	ethyl sulfate	0.790069	-6.12865
C0137	A0084	1-butyl-1-methylpiperidin-1-ium	trifluoromethanesulfonate	0.439846	-1.64172
C0137	A0087	1-butyl-1-methylpiperidin-1-ium	acetate	1.10433	-22.9769
C0137	A0089	1-butyl-1-methylpiperidin-1-ium	2-chloroacetate	0.953776	-17.2388
C0137	A0090	1-butyl-1-methylpiperidin-1-ium	nitrooxidane	0.704536	-8.76613
C0137	A0091	1-butyl-1-methylpiperidin-1-ium	diethyl phosphate	0.988976	-15.3515
C0137	A0092	1-butyl-1-methylpiperidin-1-ium	dibutyl phosphate	1.02847	-14.7682
C0137	A0093	1-butyl-1-methylpiperidin-1-ium	sulfamate	0.864576	-8.83211
C0137	A0094	1-butyl-1-methylpiperidin-1-ium	pyridine-4-carboxylate	0.909486	-16.9384
C0137	A0095	1-butyl-1-methylpiperidin-1-ium	pyridine-3-carboxylate	0.930136	-17.5814
C0137	A0097	1-butyl-1-methylpiperidin-1-ium	O-(difluorophosphoryl)oxidanidolate	0.603654	-8.47675
C0137	A0103	1-butyl-1-methylpiperidin-1-ium	ethanesulfonate	0.900043	-10.2665
C0137	A0104	1-butyl-1-methylpiperidin-1-ium	propane-1-sulfonate	0.90394	-9.94527
C0137	A0105	1-butyl-1-methylpiperidin-1-ium	butane-1-sulfonate	0.912147	-9.72664
C0137	A0106	1-butyl-1-methylpiperidin-1-ium	hexane-1-sulfonate	0.927295	-9.34457
C0137	A0107	1-butyl-1-methylpiperidin-1-ium	hydrogen oxalate	0.78181	-8.36357
C0137	A0120	1-butyl-1-methylpiperidin-1-ium	2-hydroxyacetate	0.861109	-15.4627
C0137	A0121	1-butyl-1-methylpiperidin-1-ium	(2R)-2-hydroxypropanoate	0.83412	-15.2416
C0137	A0123	1-butyl-1-methylpiperidin-1-ium	bis[(2R)-2,4,4-trimethylpentyl]phosphinate	0.84465	-20.0384
C0137	A0136	1-butyl-1-methylpiperidin-1-ium	cyclohexanecarboxylate	1.0411	-22.3108
C0137	A0137	1-butyl-1-methylpiperidin-1-ium	2-cyclopentylacetate	1.05054	-22.1134
C0137	A0138	1-butyl-1-methylpiperidin-1-ium	cyclopentanecarboxylate	1.03832	-22.1907
C0137	A0145	1-butyl-1-methylpiperidin-1-ium	2-hydroxybenzoate	0.690687	-11.0807
C0137	A0152	1-butyl-1-methylpiperidin-1-ium	benzenolate	0.862882	-18.9484
C0137	A0153	1-butyl-1-methylpiperidin-1-ium	4-methylbenzen-1-olate	0.892604	-19.796
C0137	A0154	1-butyl-1-methylpiperidin-1-ium	4-methoxybenzen-1-olate	0.902318	-19.2776
C0137	A0155	1-butyl-1-methylpiperidin-1-ium	4-fluorobenzen-1-olate	0.788856	-18.7106
C0137	A0157	1-butyl-1-methylpiperidin-1-ium	butanoate	1.07508	-22.6148
C0137	A0158	1-butyl-1-methylpiperidin-1-ium	hexanoate	1.08962	-22.2215
C0137	A0161	1-butyl-1-methylpiperidin-1-ium	2,2-dimethylpropanoate	0.978249	-22.1233
C0137	A0163	1-butyl-1-methylpiperidin-1-ium	ethanethioate	0.895156	-10.8191
C0137	A0173	1-butyl-1-methylpiperidin-1-ium	(2E)-but-2-enoate	1.09046	-21.7547
C0137	A0175	1-butyl-1-methylpiperidin-1-ium	2-methylbenzene-1-sulfonate	0.778977	-7.08103
C0137	A0179	1-butyl-1-methylpiperidin-1-ium	1H-1,3-benzodiazol-1-ide	0.732133	-16.5288
C0137	A0189	1-butyl-1-methylpiperidin-1-ium	dimethyl phosphate	1.04864	-15.3095
C0137	A0194	1-butyl-1-methylpiperidin-1-ium	2-methylpropanoate	1.03648	-22.2772
C0137	A0195	1-butyl-1-methylpiperidin-1-ium	4-oxopentanoate	1.13397	-21.0923
C0137	A0197	1-butyl-1-methylpiperidin-1-ium	methyl phosphonate	1.00562	-16.5285
C0137	A0199	1-butyl-1-methylpiperidin-1-ium	propanoate	1.07156	-22.7173
C0137	A0202	1-butyl-1-methylpiperidin-1-ium	2-aminoethane-1-sulfonate	0.947763	-11.4288
C0137	A0205	1-butyl-1-methylpiperidin-1-ium	1H-1,2,3-triazol-1-ide	0.906724	-17.0188
C0137	A0206	1-butyl-1-methylpiperidin-1-ium	1H-1,2,3,4-tetrazol-5-ide	0.920217	-18.4158
C0137	A0208	1-butyl-1-methylpiperidin-1-ium	2-fluorobenzen-1-olate	0.761777	-16.6355
C0137	A0210	1-butyl-1-methylpiperidin-1-ium	2,2,2-trifluoroethan-1-olate	0.906877	-28.0045
C0137	A0212	1-butyl-1-methylpiperidin-1-ium	2-oxopyrrolidin-1-ide	1.14607	-25.9656
C0137	A0235	1-butyl-1-methylpiperidin-1-ium	4-chlorobenzen-1-olate	0.789802	-16.9811
C0137	A0237	1-butyl-1-methylpiperidin-1-ium	3-chlorobenzen-1-olate	0.761124	-15.8498
C0137	A0239	1-butyl-1-methylpiperidin-1-ium	2,4-dichlorobenzen-1-olate	0.721256	-14.0961
C0137	A0240	1-butyl-1-methylpiperidin-1-ium	2,4,6-trichlorobenzen-1-olate	0.674609	-10.5758
C0137	A0241	1-butyl-1-methylpiperidin-1-ium	3-methylbenzen-1-olate	0.887727	-19.3557
C0137	A0242	1-butyl-1-methylpiperidin-1-ium	2-methylbenzen-1-olate	0.8036	-18.0605
C0137	A0243	1-butyl-1-methylpiperidin-1-ium	2,4-dimethylbenzen-1-olate	0.835608	-19.162
C0137	A0257	1-butyl-1-methylpiperidin-1-ium	1H-pyrazol-1-ide	0.954771	-20.9559
C0137	A0269	1-butyl-1-methylpiperidin-1-ium	2-carboxyacetate	0.951123	-12.6416
C0137	A0270	1-butyl-1-methylpiperidin-1-ium	benzenesulfonate	0.823909	-7.12598
C0137	A0272	1-butyl-1-methylpiperidin-1-ium	fluoranesulfonate	0.499389	-1.32332
C0137	A0273	1-butyl-1-methylpiperidin-1-ium	2-methoxyacetate	1.11717	-19.7626
C0137	A0278	1-butyl-1-methylpiperidin-1-ium	hexyl sulfate	0.827995	-5.24099
C0137	A0279	1-butyl-1-methylpiperidin-1-ium	ethyl phosphonite	1.01708	-19.3387
C0137	A0280	1-butyl-1-methylpiperidin-1-ium	butyl phosphonite	1.03026	-18.7566
C0137	A0281	1-butyl-1-methylpiperidin-1-ium	hexyl phosphonite	1.0456	-18.3873
C0137	A0295	1-butyl-1-methylpiperidin-1-ium	1H-1,2,4-triazol-1-ide	0.892145	-18.0972
C0137	A0296	1-butyl-1-methylpiperidin-1-ium	1H-1,2,3,4-tetrazol-1-ide	0.776441	-12.6082
C0137	A0307	1-butyl-1-methylpiperidin-1-ium	(1r,4r)-4-fluorocyclohexan-1-olate	1.21801	-35.1478
C0137	A0317	1-butyl-1-methylpiperidin-1-ium	pyridin-3-olate	0.824249	-16.9636
C0137	A0320	1-butyl-1-methylpiperidin-1-ium	hydrogen phosphonate	1.04421	-14.7283
C0137	A0391	1-butyl-1-methylpiperidin-1-ium	4-methyl-1H-imidazol-1-ide	0.861453	-20.4862
C0137	A0412	1-butyl-1-methylpiperidin-1-ium	hydrogen ethylphosphonate	1.09531	-16.9103
C0137	A0419	1-butyl-1-methylpiperidin-1-ium	ethyl phosphonate	1.0263	-15.9377
C0137	A0420	1-butyl-1-methylpiperidin-1-ium	butyl phosphonate	1.03387	-15.429
C0137	A0457	1-butyl-1-methylpiperidin-1-ium	hydrogen methylphosphonate	1.14073	-17.249
C0141	A0012	1-(2-methoxyethyl)-1-methylpyrrolidin-1-ium	dihydrogen phosphate	1.02889	-12.2909
C0141	A0017	1-(2-methoxyethyl)-1-methylpyrrolidin-1-ium	hydrogen sulfate	0.682949	-4.92423
C0141	A0024	1-(2-methoxyethyl)-1-methylpyrrolidin-1-ium	formate	1.00023	-18.917
C0141	A0030	1-(2-methoxyethyl)-1-methylpyrrolidin-1-ium	4-methylbenzene-1-sulfonate	0.785573	-6.73071
C0141	A0031	1-(2-methoxyethyl)-1-methylpyrrolidin-1-ium	benzoate	0.90384	-17.6242
C0141	A0033	1-(2-methoxyethyl)-1-methylpyrrolidin-1-ium	chloride	1.23963	-16.1487
C0141	A0039	1-(2-methoxyethyl)-1-methylpyrrolidin-1-ium	(2E)-3-carboxyprop-2-enoate	0.804538	-9.73639
C0141	A0044	1-(2-methoxyethyl)-1-methylpyrrolidin-1-ium	methyl sulfate	0.703399	-5.80026
C0141	A0047	1-(2-methoxyethyl)-1-methylpyrrolidin-1-ium	(2E)-but-2-enoate	1.04105	-20.3803
C0141	A0050	1-(2-methoxyethyl)-1-methylpyrrolidin-1-ium	butyl sulfate	0.738106	-5.13124
C0141	A0051	1-(2-methoxyethyl)-1-methylpyrrolidin-1-ium	perchlorate	0.369536	1.37289
C0141	A0054	1-(2-methoxyethyl)-1-methylpyrrolidin-1-ium	methanesulfonate	0.871955	-10.1065
C0141	A0062	1-(2-methoxyethyl)-1-methylpyrrolidin-1-ium	nitrite	0.842146	-14.3334
C0141	A0063	1-(2-methoxyethyl)-1-methylpyrrolidin-1-ium	dinitroazanide	0.332659	0.18348
C0141	A0064	1-(2-methoxyethyl)-1-methylpyrrolidin-1-ium	trifluoroacetate	0.523108	-9.30056
C0141	A0070	1-(2-methoxyethyl)-1-methylpyrrolidin-1-ium	hydrogen carbonate	0.970983	-14.9323
C0141	A0077	1-(2-methoxyethyl)-1-methylpyrrolidin-1-ium	pentyl sulfate	0.748234	-4.95621
C0141	A0081	1-(2-methoxyethyl)-1-methylpyrrolidin-1-ium	(2S)-2-hydroxypropanoate	0.776084	-14.252
C0141	A0083	1-(2-methoxyethyl)-1-methylpyrrolidin-1-ium	ethyl sulfate	0.724719	-5.68946
C0141	A0084	1-(2-methoxyethyl)-1-methylpyrrolidin-1-ium	trifluoromethanesulfonate	0.36337	-1.16282
C0141	A0087	1-(2-methoxyethyl)-1-methylpyrrolidin-1-ium	acetate	1.06547	-21.9248
C0141	A0089	1-(2-methoxyethyl)-1-methylpyrrolidin-1-ium	2-chloroacetate	0.899041	-16.1579
C0141	A0090	1-(2-methoxyethyl)-1-methylpyrrolidin-1-ium	nitrooxidane	0.655493	-8.58719
C0141	A0091	1-(2-methoxyethyl)-1-methylpyrrolidin-1-ium	diethyl phosphate	0.926755	-14.2522
C0141	A0092	1-(2-methoxyethyl)-1-methylpyrrolidin-1-ium	dibutyl phosphate	0.966539	-13.6687
C0141	A0093	1-(2-methoxyethyl)-1-methylpyrrolidin-1-ium	sulfamate	0.82959	-8.98291
C0141	A0094	1-(2-methoxyethyl)-1-methylpyrrolidin-1-ium	pyridine-4-carboxylate	0.849226	-15.5762
C0141	A0095	1-(2-methoxyethyl)-1-methylpyrrolidin-1-ium	pyridine-3-carboxylate	0.870623	-16.2025
C0141	A0097	1-(2-methoxyethyl)-1-methylpyrrolidin-1-ium	O-(difluorophosphoryl)oxidanidolate	0.535424	-7.7088
C0141	A0103	1-(2-methoxyethyl)-1-methylpyrrolidin-1-ium	ethanesulfonate	0.842532	-9.73736
C0141	A0104	1-(2-methoxyethyl)-1-methylpyrrolidin-1-ium	propane-1-sulfonate	0.841922	-9.30574
C0141	A0105	1-(2-methoxyethyl)-1-methylpyrrolidin-1-ium	butane-1-sulfonate	0.847827	-9.038
C0141	A0106	1-(2-methoxyethyl)-1-methylpyrrolidin-1-ium	hexane-1-sulfonate	0.861534	-8.63577
C0141	A0107	1-(2-methoxyethyl)-1-methylpyrrolidin-1-ium	hydrogen oxalate	0.728594	-7.84552
C0141	A0120	1-(2-methoxyethyl)-1-methylpyrrolidin-1-ium	2-hydroxyacetate	0.808619	-14.6044
C0141	A0121	1-(2-methoxyethyl)-1-methylpyrrolidin-1-ium	(2R)-2-hydroxypropanoate	0.775427	-14.1536
C0141	A0123	1-(2-methoxyethyl)-1-methylpyrrolidin-1-ium	bis[(2R)-2,4,4-trimethylpentyl]phosphinate	0.806495	-18.566
C0141	A0136	1-(2-methoxyethyl)-1-methylpyrrolidin-1-ium	cyclohexanecarboxylate	0.987813	-20.6461
C0141	A0137	1-(2-methoxyethyl)-1-methylpyrrolidin-1-ium	2-cyclopentylacetate	0.996535	-20.4506
C0141	A0138	1-(2-methoxyethyl)-1-methylpyrrolidin-1-ium	cyclopentanecarboxylate	0.984718	-20.554
C0141	A0145	1-(2-methoxyethyl)-1-methylpyrrolidin-1-ium	2-hydroxybenzoate	0.620317	-9.88808
C0141	A0152	1-(2-methoxyethyl)-1-methylpyrrolidin-1-ium	benzenolate	0.799316	-17.3706
C0141	A0153	1-(2-methoxyethyl)-1-methylpyrrolidin-1-ium	4-methylbenzen-1-olate	0.83076	-18.1506
C0141	A0154	1-(2-methoxyethyl)-1-methylpyrrolidin-1-ium	4-methoxybenzen-1-olate	0.838176	-17.6707
C0141	A0155	1-(2-methoxyethyl)-1-methylpyrrolidin-1-ium	4-fluorobenzen-1-olate	0.721903	-17.0623
C0141	A0157	1-(2-methoxyethyl)-1-methylpyrrolidin-1-ium	butanoate	1.02445	-21.0811
C0141	A0158	1-(2-methoxyethyl)-1-methylpyrrolidin-1-ium	hexanoate	1.03603	-20.569
C0141	A0161	1-(2-methoxyethyl)-1-methylpyrrolidin-1-ium	2,2-dimethylpropanoate	0.924807	-20.4673
C0141	A0163	1-(2-methoxyethyl)-1-methylpyrrolidin-1-ium	ethanethioate	0.836933	-10.0934
C0141	A0173	1-(2-methoxyethyl)-1-methylpyrrolidin-1-ium	(2E)-but-2-enoate	1.03942	-20.3524
C0141	A0175	1-(2-methoxyethyl)-1-methylpyrrolidin-1-ium	2-methylbenzene-1-sulfonate	0.711429	-6.40847
C0141	A0179	1-(2-methoxyethyl)-1-methylpyrrolidin-1-ium	1H-1,3-benzodiazol-1-ide	0.661491	-14.9263
C0141	A0189	1-(2-methoxyethyl)-1-methylpyrrolidin-1-ium	dimethyl phosphate	0.992704	-14.4732
C0141	A0194	1-(2-methoxyethyl)-1-methylpyrrolidin-1-ium	2-methylpropanoate	0.985499	-20.7482
C0141	A0195	1-(2-methoxyethyl)-1-methylpyrrolidin-1-ium	4-oxopentanoate	1.07701	-19.7203
C0141	A0197	1-(2-methoxyethyl)-1-methylpyrrolidin-1-ium	methyl phosphonate	0.954137	-15.7218
C0141	A0199	1-(2-methoxyethyl)-1-methylpyrrolidin-1-ium	propanoate	1.0247	-21.3458
C0141	A0202	1-(2-methoxyethyl)-1-methylpyrrolidin-1-ium	2-aminoethane-1-sulfonate	0.897401	-11.0154
C0141	A0205	1-(2-methoxyethyl)-1-methylpyrrolidin-1-ium	1H-1,2,3-triazol-1-ide	0.85792	-16.1986
C0141	A0206	1-(2-methoxyethyl)-1-methylpyrrolidin-1-ium	1H-1,2,3,4-tetrazol-5-ide	0.887923	-17.8251
C0141	A0208	1-(2-methoxyethyl)-1-methylpyrrolidin-1-ium	2-fluorobenzen-1-olate	0.693814	-15.1081
C0141	A0210	1-(2-methoxyethyl)-1-methylpyrrolidin-1-ium	2,2,2-trifluoroethan-1-olate	0.849193	-25.9932
C0141	A0212	1-(2-methoxyethyl)-1-methylpyrrolidin-1-ium	2-oxopyrrolidin-1-ide	1.09887	-24.3755
C0141	A0235	1-(2-methoxyethyl)-1-methylpyrrolidin-1-ium	4-chlorobenzen-1-olate	0.721997	-15.3986
C0141	A0237	1-(2-methoxyethyl)-1-methylpyrrolidin-1-ium	3-chlorobenzen-1-olate	0.692563	-14.3258
C0141	A0239	1-(2-methoxyethyl)-1-methylpyrrolidin-1-ium	2,4-dichlorobenzen-1-olate	0.654803	-12.6885
C0141	A0240	1-(2-methoxyethyl)-1-methylpyrrolidin-1-ium	2,4,6-trichlorobenzen-1-olate	0.6163	-9.51282
C0141	A0241	1-(2-methoxyethyl)-1-methylpyrrolidin-1-ium	3-methylbenzen-1-olate	0.825364	-17.7401
C0141	A0242	1-(2-methoxyethyl)-1-methylpyrrolidin-1-ium	2-methylbenzen-1-olate	0.738728	-16.4358
C0141	A0243	1-(2-methoxyethyl)-1-methylpyrrolidin-1-ium	2,4-dimethylbenzen-1-olate	0.774606	-17.5048
C0141	A0257	1-(2-methoxyethyl)-1-methylpyrrolidin-1-ium	1H-pyrazol-1-ide	0.903052	-19.6866
C0141	A0269	1-(2-methoxyethyl)-1-methylpyrrolidin-1-ium	2-carboxyacetate	0.901536	-11.9171
C0141	A0270	1-(2-methoxyethyl)-1-methylpyrrolidin-1-ium	benzenesulfonate	0.757296	-6.50782
C0141	A0272	1-(2-methoxyethyl)-1-methylpyrrolidin-1-ium	fluoranesulfonate	0.423577	-0.98142
C0141	A0273	1-(2-methoxyethyl)-1-methylpyrrolidin-1-ium	2-methoxyacetate	1.06737	-18.6766
C0141	A0278	1-(2-methoxyethyl)-1-methylpyrrolidin-1-ium	hexyl sulfate	0.760352	-4.79069
C0141	A0279	1-(2-methoxyethyl)-1-methylpyrrolidin-1-ium	ethyl phosphonite	0.96078	-18.046
C0141	A0280	1-(2-methoxyethyl)-1-methylpyrrolidin-1-ium	butyl phosphonite	0.970719	-17.3608
C0141	A0281	1-(2-methoxyethyl)-1-methylpyrrolidin-1-ium	hexyl phosphonite	0.986795	-16.9812
C0141	A0295	1-(2-methoxyethyl)-1-methylpyrrolidin-1-ium	1H-1,2,4-triazol-1-ide	0.842213	-17.1719
C0141	A0296	1-(2-methoxyethyl)-1-methylpyrrolidin-1-ium	1H-1,2,3,4-tetrazol-1-ide	0.727271	-12.0906
C0141	A0307	1-(2-methoxyethyl)-1-methylpyrrolidin-1-ium	(1r,4r)-4-fluorocyclohexan-1-olate	1.16818	-32.7784
C0141	A0317	1-(2-methoxyethyl)-1-methylpyrrolidin-1-ium	pyridin-3-olate	0.760752	-15.5978
C0141	A0320	1-(2-methoxyethyl)-1-methylpyrrolidin-1-ium	hydrogen phosphonate	1.01072	-14.455
C0141	A0391	1-(2-methoxyethyl)-1-methylpyrrolidin-1-ium	4-methyl-1H-imidazol-1-ide	0.800633	-18.8812
C0141	A0412	1-(2-methoxyethyl)-1-methylpyrrolidin-1-ium	hydrogen ethylphosphonate	1.05017	-16.0535
C0141	A0419	1-(2-methoxyethyl)-1-methylpyrrolidin-1-ium	ethyl phosphonate	0.970782	-15.0214
C0141	A0420	1-(2-methoxyethyl)-1-methylpyrrolidin-1-ium	butyl phosphonate	0.973553	-14.3728
C0141	A0457	1-(2-methoxyethyl)-1-methylpyrrolidin-1-ium	hydrogen methylphosphonate	1.10311	-16.6567
C0145	A0012	3-(2-methoxy-2-oxoethyl)-1-methyl-1H-imidazol-3-ium	dihydrogen phosphate	0.888914	-7.20066
C0145	A0017	3-(2-methoxy-2-oxoethyl)-1-methyl-1H-imidazol-3-ium	hydrogen sulfate	0.569672	-1.02708
C0145	A0024	3-(2-methoxy-2-oxoethyl)-1-methyl-1H-imidazol-3-ium	formate	0.849665	-12.1748
C0145	A0030	3-(2-methoxy-2-oxoethyl)-1-methyl-1H-imidazol-3-ium	4-methylbenzene-1-sulfonate	0.7009	-3.7096
C0145	A0031	3-(2-methoxy-2-oxoethyl)-1-methyl-1H-imidazol-3-ium	benzoate	0.800017	-10.8237
C0145	A0033	3-(2-methoxy-2-oxoethyl)-1-methyl-1H-imidazol-3-ium	chloride	1.05921	-10.769
C0145	A0039	3-(2-methoxy-2-oxoethyl)-1-methyl-1H-imidazol-3-ium	(2E)-3-carboxyprop-2-enoate	0.709063	-5.08868
C0145	A0044	3-(2-methoxy-2-oxoethyl)-1-methyl-1H-imidazol-3-ium	methyl sulfate	0.59766	-2.36688
C0145	A0047	3-(2-methoxy-2-oxoethyl)-1-methyl-1H-imidazol-3-ium	(2E)-but-2-enoate	0.905543	-13.2667
C0145	A0050	3-(2-methoxy-2-oxoethyl)-1-methyl-1H-imidazol-3-ium	butyl sulfate	0.651071	-2.72805
C0145	A0051	3-(2-methoxy-2-oxoethyl)-1-methyl-1H-imidazol-3-ium	perchlorate	0.293852	3.61119
C0145	A0054	3-(2-methoxy-2-oxoethyl)-1-methyl-1H-imidazol-3-ium	methanesulfonate	0.740387	-5.9202
C0145	A0062	3-(2-methoxy-2-oxoethyl)-1-methyl-1H-imidazol-3-ium	nitrite	0.704652	-8.16886
C0145	A0063	3-(2-methoxy-2-oxoethyl)-1-methyl-1H-imidazol-3-ium	dinitroazanide	0.293085	2.42185
C0145	A0064	3-(2-methoxy-2-oxoethyl)-1-methyl-1H-imidazol-3-ium	trifluoroacetate	0.448418	-4.75829
C0145	A0070	3-(2-methoxy-2-oxoethyl)-1-methyl-1H-imidazol-3-ium	hydrogen carbonate	0.827288	-9.18967
C0145	A0077	3-(2-methoxy-2-oxoethyl)-1-methyl-1H-imidazol-3-ium	pentyl sulfate	0.665538	-2.76227
C0145	A0081	3-(2-methoxy-2-oxoethyl)-1-methyl-1H-imidazol-3-ium	(2S)-2-hydroxypropanoate	0.66241	-8.77497
C0145	A0083	3-(2-methoxy-2-oxoethyl)-1-methyl-1H-imidazol-3-ium	ethyl sulfate	0.625177	-2.65176
C0145	A0084	3-(2-methoxy-2-oxoethyl)-1-methyl-1H-imidazol-3-ium	trifluoromethanesulfonate	0.329525	0.75582
C0145	A0087	3-(2-methoxy-2-oxoethyl)-1-methyl-1H-imidazol-3-ium	acetate	0.915575	-14.4556
C0145	A0089	3-(2-methoxy-2-oxoethyl)-1-methyl-1H-imidazol-3-ium	2-chloroacetate	0.771967	-10.013
C0145	A0090	3-(2-methoxy-2-oxoethyl)-1-methyl-1H-imidazol-3-ium	nitrooxidane	0.537185	-3.72921
C0145	A0091	3-(2-methoxy-2-oxoethyl)-1-methyl-1H-imidazol-3-ium	diethyl phosphate	0.808262	-9.75464
C0145	A0092	3-(2-methoxy-2-oxoethyl)-1-methyl-1H-imidazol-3-ium	dibutyl phosphate	0.855743	-9.70717
C0145	A0093	3-(2-methoxy-2-oxoethyl)-1-methyl-1H-imidazol-3-ium	sulfamate	0.708196	-4.73986
C0145	A0094	3-(2-methoxy-2-oxoethyl)-1-methyl-1H-imidazol-3-ium	pyridine-4-carboxylate	0.753324	-9.39189
C0145	A0095	3-(2-methoxy-2-oxoethyl)-1-methyl-1H-imidazol-3-ium	pyridine-3-carboxylate	0.770993	-9.84947
C0145	A0097	3-(2-methoxy-2-oxoethyl)-1-methyl-1H-imidazol-3-ium	O-(difluorophosphoryl)oxidanidolate	0.443336	-3.48171
C0145	A0103	3-(2-methoxy-2-oxoethyl)-1-methyl-1H-imidazol-3-ium	ethanesulfonate	0.719776	-5.86308
C0145	A0104	3-(2-methoxy-2-oxoethyl)-1-methyl-1H-imidazol-3-ium	propane-1-sulfonate	0.725211	-5.77936
C0145	A0105	3-(2-methoxy-2-oxoethyl)-1-methyl-1H-imidazol-3-ium	butane-1-sulfonate	0.735605	-5.7761
C0145	A0106	3-(2-methoxy-2-oxoethyl)-1-methyl-1H-imidazol-3-ium	hexane-1-sulfonate	0.756196	-5.75511
C0145	A0107	3-(2-methoxy-2-oxoethyl)-1-methyl-1H-imidazol-3-ium	hydrogen oxalate	0.616762	-3.16655
C0145	A0120	3-(2-methoxy-2-oxoethyl)-1-methyl-1H-imidazol-3-ium	2-hydroxyacetate	0.68347	-8.82479
C0145	A0121	3-(2-methoxy-2-oxoethyl)-1-methyl-1H-imidazol-3-ium	(2R)-2-hydroxypropanoate	0.661554	-8.70082
C0145	A0123	3-(2-methoxy-2-oxoethyl)-1-methyl-1H-imidazol-3-ium	bis[(2R)-2,4,4-trimethylpentyl]phosphinate	0.728556	-12.9991
C0145	A0136	3-(2-methoxy-2-oxoethyl)-1-methyl-1H-imidazol-3-ium	cyclohexanecarboxylate	0.862622	-13.9909
C0145	A0137	3-(2-methoxy-2-oxoethyl)-1-methyl-1H-imidazol-3-ium	2-cyclopentylacetate	0.871776	-13.8987
C0145	A0138	3-(2-methoxy-2-oxoethyl)-1-methyl-1H-imidazol-3-ium	cyclopentanecarboxylate	0.859458	-13.8003
C0145	A0145	3-(2-methoxy-2-oxoethyl)-1-methyl-1H-imidazol-3-ium	2-hydroxybenzoate	0.56269	-5.20215
C0145	A0152	3-(2-methoxy-2-oxoethyl)-1-methyl-1H-imidazol-3-ium	benzenolate	0.711271	-10.3878
C0145	A0153	3-(2-methoxy-2-oxoethyl)-1-methyl-1H-imidazol-3-ium	4-methylbenzen-1-olate	0.746929	-11.2341
C0145	A0154	3-(2-methoxy-2-oxoethyl)-1-methyl-1H-imidazol-3-ium	4-methoxybenzen-1-olate	0.749932	-10.9241
C0145	A0155	3-(2-methoxy-2-oxoethyl)-1-methyl-1H-imidazol-3-ium	4-fluorobenzen-1-olate	0.647413	-10.165
C0145	A0157	3-(2-methoxy-2-oxoethyl)-1-methyl-1H-imidazol-3-ium	butanoate	0.891169	-14.0659
C0145	A0158	3-(2-methoxy-2-oxoethyl)-1-methyl-1H-imidazol-3-ium	hexanoate	0.909705	-14.0173
C0145	A0161	3-(2-methoxy-2-oxoethyl)-1-methyl-1H-imidazol-3-ium	2,2-dimethylpropanoate	0.807987	-13.5249
C0145	A0163	3-(2-methoxy-2-oxoethyl)-1-methyl-1H-imidazol-3-ium	ethanethioate	0.731205	-5.16249
C0145	A0173	3-(2-methoxy-2-oxoethyl)-1-methyl-1H-imidazol-3-ium	(2E)-but-2-enoate	0.904064	-13.248
C0145	A0175	3-(2-methoxy-2-oxoethyl)-1-methyl-1H-imidazol-3-ium	2-methylbenzene-1-sulfonate	0.639519	-3.37506
C0145	A0179	3-(2-methoxy-2-oxoethyl)-1-methyl-1H-imidazol-3-ium	1H-1,3-benzodiazol-1-ide	0.604563	-8.29086
C0145	A0189	3-(2-methoxy-2-oxoethyl)-1-methyl-1H-imidazol-3-ium	dimethyl phosphate	0.853854	-9.64214
C0145	A0194	3-(2-methoxy-2-oxoethyl)-1-methyl-1H-imidazol-3-ium	2-methylpropanoate	0.855888	-13.7557
C0145	A0195	3-(2-methoxy-2-oxoethyl)-1-methyl-1H-imidazol-3-ium	4-oxopentanoate	0.931729	-13.1269
C0145	A0197	3-(2-methoxy-2-oxoethyl)-1-methyl-1H-imidazol-3-ium	methyl phosphonate	0.815532	-10.4616
C0145	A0199	3-(2-methoxy-2-oxoethyl)-1-methyl-1H-imidazol-3-ium	propanoate	0.885786	-14.1088
C0145	A0202	3-(2-methoxy-2-oxoethyl)-1-methyl-1H-imidazol-3-ium	2-aminoethane-1-sulfonate	0.775268	-6.84905
C0145	A0205	3-(2-methoxy-2-oxoethyl)-1-methyl-1H-imidazol-3-ium	1H-1,2,3-triazol-1-ide	0.738311	-9.62861
C0145	A0206	3-(2-methoxy-2-oxoethyl)-1-methyl-1H-imidazol-3-ium	1H-1,2,3,4-tetrazol-5-ide	0.777943	-10.3727
C0145	A0208	3-(2-methoxy-2-oxoethyl)-1-methyl-1H-imidazol-3-ium	2-fluorobenzen-1-olate	0.621903	-8.74227
C0145	A0210	3-(2-methoxy-2-oxoethyl)-1-methyl-1H-imidazol-3-ium	2,2,2-trifluoroethan-1-olate	0.743509	-16.7336
C0145	A0212	3-(2-methoxy-2-oxoethyl)-1-methyl-1H-imidazol-3-ium	2-oxopyrrolidin-1-ide	0.960038	-16.571
C0145	A0235	3-(2-methoxy-2-oxoethyl)-1-methyl-1H-imidazol-3-ium	4-chlorobenzen-1-olate	0.664416	-9.13322
C0145	A0237	3-(2-methoxy-2-oxoethyl)-1-methyl-1H-imidazol-3-ium	3-chlorobenzen-1-olate	0.640825	-8.37945
C0145	A0239	3-(2-methoxy-2-oxoethyl)-1-methyl-1H-imidazol-3-ium	2,4-dichlorobenzen-1-olate	0.630465	-7.3993
C0145	A0240	3-(2-methoxy-2-oxoethyl)-1-methyl-1H-imidazol-3-ium	2,4,6-trichlorobenzen-1-olate	0.625192	-5.49774
C0145	A0241	3-(2-methoxy-2-oxoethyl)-1-methyl-1H-imidazol-3-ium	3-methylbenzen-1-olate	0.740657	-10.9316
C0145	A0242	3-(2-methoxy-2-oxoethyl)-1-methyl-1H-imidazol-3-ium	2-methylbenzen-1-olate	0.671673	-9.82788
C0145	A0243	3-(2-methoxy-2-oxoethyl)-1-methyl-1H-imidazol-3-ium	2,4-dimethylbenzen-1-olate	0.710307	-10.841
C0145	A0257	3-(2-methoxy-2-oxoethyl)-1-methyl-1H-imidazol-3-ium	1H-pyrazol-1-ide	0.77978	-12.0007
C0145	A0269	3-(2-methoxy-2-oxoethyl)-1-methyl-1H-imidazol-3-ium	2-carboxyacetate	0.779976	-6.74753
C0145	A0270	3-(2-methoxy-2-oxoethyl)-1-methyl-1H-imidazol-3-ium	benzenesulfonate	0.673105	-3.2638
C0145	A0272	3-(2-methoxy-2-oxoethyl)-1-methyl-1H-imidazol-3-ium	fluoranesulfonate	0.349484	1.87005
C0145	A0273	3-(2-methoxy-2-oxoethyl)-1-methyl-1H-imidazol-3-ium	2-methoxyacetate	0.920218	-12.4621
C0145	A0278	3-(2-methoxy-2-oxoethyl)-1-methyl-1H-imidazol-3-ium	hexyl sulfate	0.681077	-2.77114
C0145	A0279	3-(2-methoxy-2-oxoethyl)-1-methyl-1H-imidazol-3-ium	ethyl phosphonite	0.833879	-11.8291
C0145	A0280	3-(2-methoxy-2-oxoethyl)-1-methyl-1H-imidazol-3-ium	butyl phosphonite	0.855542	-11.7203
C0145	A0281	3-(2-methoxy-2-oxoethyl)-1-methyl-1H-imidazol-3-ium	hexyl phosphonite	0.879283	-11.6486
C0145	A0295	3-(2-methoxy-2-oxoethyl)-1-methyl-1H-imidazol-3-ium	1H-1,2,4-triazol-1-ide	0.725914	-10.2831
C0145	A0296	3-(2-methoxy-2-oxoethyl)-1-methyl-1H-imidazol-3-ium	1H-1,2,3,4-tetrazol-1-ide	0.626447	-6.2986
C0145	A0307	3-(2-methoxy-2-oxoethyl)-1-methyl-1H-imidazol-3-ium	(1r,4r)-4-fluorocyclohexan-1-olate	1.04198	-22.3152
C0145	A0317	3-(2-methoxy-2-oxoethyl)-1-methyl-1H-imidazol-3-ium	pyridin-3-olate	0.674751	-9.30145
C0145	A0320	3-(2-methoxy-2-oxoethyl)-1-methyl-1H-imidazol-3-ium	hydrogen phosphonate	0.865591	-9.06962
C0145	A0391	3-(2-methoxy-2-oxoethyl)-1-methyl-1H-imidazol-3-ium	4-methyl-1H-imidazol-1-ide	0.70364	-11.4087
C0145	A0412	3-(2-methoxy-2-oxoethyl)-1-methyl-1H-imidazol-3-ium	hydrogen ethylphosphonate	0.913158	-10.8004
C0145	A0419	3-(2-methoxy-2-oxoethyl)-1-methyl-1H-imidazol-3-ium	ethyl phosphonate	0.835225	-10.1746
C0145	A0420	3-(2-methoxy-2-oxoethyl)-1-methyl-1H-imidazol-3-ium	butyl phosphonate	0.848134	-10.0302
C0145	A0457	3-(2-methoxy-2-oxoethyl)-1-methyl-1H-imidazol-3-ium	hydrogen methylphosphonate	0.95559	-11.1417
C0161	A0012	triethyl(pentyl)phosphanium	dihydrogen phosphate	1.07308	-12.5735
C0161	A0017	triethyl(pentyl)phosphanium	hydrogen sulfate	0.767056	-5.08876
C0161	A0024	triethyl(pentyl)phosphanium	formate	1.0612	-19.8332
C0161	A0030	triethyl(pentyl)phosphanium	4-methylbenzene-1-sulfonate	0.893722	-7.57304
C0161	A0031	triethyl(pentyl)phosphanium	benzoate	1.0075	-20.4002
C0161	A0033	triethyl(pentyl)phosphanium	chloride	1.2716	-15.1272
C0161	A0039	triethyl(pentyl)phosphanium	(2E)-3-carboxyprop-2-enoate	0.897519	-11.244
C0161	A0044	triethyl(pentyl)phosphanium	methyl sulfate	0.801793	-6.1223
C0161	A0047	triethyl(pentyl)phosphanium	(2E)-but-2-enoate	1.13472	-23.0372
C0161	A0050	triethyl(pentyl)phosphanium	butyl sulfate	0.847311	-5.72835
C0161	A0051	triethyl(pentyl)phosphanium	perchlorate	0.485521	1.55415
C0161	A0054	triethyl(pentyl)phosphanium	methanesulfonate	0.958314	-10.4747
C0161	A0062	triethyl(pentyl)phosphanium	nitrite	0.90287	-14.6201
C0161	A0063	triethyl(pentyl)phosphanium	dinitroazanide	0.452605	-0.09614
C0161	A0064	triethyl(pentyl)phosphanium	trifluoroacetate	0.627736	-10.8712
C0161	A0070	triethyl(pentyl)phosphanium	hydrogen carbonate	1.02355	-15.2665
C0161	A0077	triethyl(pentyl)phosphanium	pentyl sulfate	0.856618	-5.53891
C0161	A0081	triethyl(pentyl)phosphanium	(2S)-2-hydroxypropanoate	0.87516	-16.1588
C0161	A0083	triethyl(pentyl)phosphanium	ethyl sulfate	0.829813	-6.19944
C0161	A0084	triethyl(pentyl)phosphanium	trifluoromethanesulfonate	0.472378	-1.50591
C0161	A0087	triethyl(pentyl)phosphanium	acetate	1.14009	-24.0724
C0161	A0089	triethyl(pentyl)phosphanium	2-chloroacetate	0.992435	-18.097
C0161	A0090	triethyl(pentyl)phosphanium	nitrooxidane	0.737955	-8.84891
C0161	A0091	triethyl(pentyl)phosphanium	diethyl phosphate	1.03534	-16.1359
C0161	A0092	triethyl(pentyl)phosphanium	dibutyl phosphate	1.07559	-15.5972
C0161	A0093	triethyl(pentyl)phosphanium	sulfamate	0.89213	-8.79179
C0161	A0094	triethyl(pentyl)phosphanium	pyridine-4-carboxylate	0.952337	-17.9491
C0161	A0095	triethyl(pentyl)phosphanium	pyridine-3-carboxylate	0.972809	-18.6225
C0161	A0097	triethyl(pentyl)phosphanium	O-(difluorophosphoryl)oxidanidolate	0.640664	-8.7557
C0161	A0103	triethyl(pentyl)phosphanium	ethanesulfonate	0.941179	-10.5247
C0161	A0104	triethyl(pentyl)phosphanium	propane-1-sulfonate	0.947258	-10.2629
C0161	A0105	triethyl(pentyl)phosphanium	butane-1-sulfonate	0.95653	-10.0763
C0161	A0106	triethyl(pentyl)phosphanium	hexane-1-sulfonate	0.972207	-9.72202
C0161	A0107	triethyl(pentyl)phosphanium	hydrogen oxalate	0.813501	-8.72237
C0161	A0120	triethyl(pentyl)phosphanium	2-hydroxyacetate	0.899587	-16.146
C0161	A0121	triethyl(pentyl)phosphanium	(2R)-2-hydroxypropanoate	0.874611	-16.048
C0161	A0123	triethyl(pentyl)phosphanium	bis[(2R)-2,4,4-trimethylpentyl]phosphinate	0.875873	-21.3951
C0161	A0136	triethyl(pentyl)phosphanium	cyclohexanecarboxylate	1.08368	-23.8045
C0161	A0137	triethyl(pentyl)phosphanium	2-cyclopentylacetate	1.09382	-23.6045
C0161	A0138	triethyl(pentyl)phosphanium	cyclopentanecarboxylate	1.08031	-23.6444
C0161	A0145	triethyl(pentyl)phosphanium	2-hydroxybenzoate	0.728891	-11.7691
C0161	A0152	triethyl(pentyl)phosphanium	benzenolate	0.904621	-20.1514
C0161	A0153	triethyl(pentyl)phosphanium	4-methylbenzen-1-olate	0.933339	-21.0847
C0161	A0154	triethyl(pentyl)phosphanium	4-methoxybenzen-1-olate	0.94522	-20.5242
C0161	A0155	triethyl(pentyl)phosphanium	4-fluorobenzen-1-olate	0.82895	-19.9119
C0161	A0157	triethyl(pentyl)phosphanium	butanoate	1.11634	-23.9996
C0161	A0158	triethyl(pentyl)phosphanium	hexanoate	1.13378	-23.7012
C0161	A0161	triethyl(pentyl)phosphanium	2,2-dimethylpropanoate	1.01755	-23.577
C0161	A0163	triethyl(pentyl)phosphanium	ethanethioate	0.936579	-11.2794
C0161	A0173	triethyl(pentyl)phosphanium	(2E)-but-2-enoate	1.13299	-23.0036
C0161	A0175	triethyl(pentyl)phosphanium	2-methylbenzene-1-sulfonate	0.818541	-7.30856
C0161	A0179	triethyl(pentyl)phosphanium	1H-1,3-benzodiazol-1-ide	0.776669	-17.665
C0161	A0189	triethyl(pentyl)phosphanium	dimethyl phosphate	1.09185	-15.899
C0161	A0194	triethyl(pentyl)phosphanium	2-methylpropanoate	1.07665	-23.6426
C0161	A0195	triethyl(pentyl)phosphanium	4-oxopentanoate	1.17925	-22.2666
C0161	A0197	triethyl(pentyl)phosphanium	methyl phosphonate	1.04528	-17.1505
C0161	A0199	triethyl(pentyl)phosphanium	propanoate	1.11045	-23.9907
C0161	A0202	triethyl(pentyl)phosphanium	2-aminoethane-1-sulfonate	0.983569	-11.6908
C0161	A0205	triethyl(pentyl)phosphanium	1H-1,2,3-triazol-1-ide	0.947991	-17.7346
C0161	A0206	triethyl(pentyl)phosphanium	1H-1,2,3,4-tetrazol-5-ide	0.94936	-19.1163
C0161	A0208	triethyl(pentyl)phosphanium	2-fluorobenzen-1-olate	0.802041	-17.6968
C0161	A0210	triethyl(pentyl)phosphanium	2,2,2-trifluoroethan-1-olate	0.941328	-29.6835
C0161	A0212	triethyl(pentyl)phosphanium	2-oxopyrrolidin-1-ide	1.18647	-27.4564
C0161	A0235	triethyl(pentyl)phosphanium	4-chlorobenzen-1-olate	0.827307	-18.0863
C0161	A0237	triethyl(pentyl)phosphanium	3-chlorobenzen-1-olate	0.798042	-16.8792
C0161	A0239	triethyl(pentyl)phosphanium	2,4-dichlorobenzen-1-olate	0.751563	-14.9904
C0161	A0240	triethyl(pentyl)phosphanium	2,4,6-trichlorobenzen-1-olate	0.694087	-11.1488
C0161	A0241	triethyl(pentyl)phosphanium	3-methylbenzen-1-olate	0.928931	-20.6126
C0161	A0242	triethyl(pentyl)phosphanium	2-methylbenzen-1-olate	0.842875	-19.2696
C0161	A0243	triethyl(pentyl)phosphanium	2,4-dimethylbenzen-1-olate	0.872948	-20.4537
C0161	A0257	triethyl(pentyl)phosphanium	1H-pyrazol-1-ide	0.996778	-22.098
C0161	A0269	triethyl(pentyl)phosphanium	2-carboxyacetate	0.983047	-13.2267
C0161	A0270	triethyl(pentyl)phosphanium	benzenesulfonate	0.86431	-7.3216
C0161	A0272	triethyl(pentyl)phosphanium	fluoranesulfonate	0.537156	-1.17336
C0161	A0273	triethyl(pentyl)phosphanium	2-methoxyacetate	1.16002	-20.7218
C0161	A0278	triethyl(pentyl)phosphanium	hexyl sulfate	0.866868	-5.34008
C0161	A0279	triethyl(pentyl)phosphanium	ethyl phosphonite	1.0573	-20.3746
C0161	A0280	triethyl(pentyl)phosphanium	butyl phosphonite	1.07232	-19.8661
C0161	A0281	triethyl(pentyl)phosphanium	hexyl phosphonite	1.08754	-19.5294
C0161	A0295	triethyl(pentyl)phosphanium	1H-1,2,4-triazol-1-ide	0.934135	-18.9106
C0161	A0296	triethyl(pentyl)phosphanium	1H-1,2,3,4-tetrazol-1-ide	0.816679	-12.9904
C0161	A0307	triethyl(pentyl)phosphanium	(1r,4r)-4-fluorocyclohexan-1-olate	1.25628	-37.349
C0161	A0317	triethyl(pentyl)phosphanium	pyridin-3-olate	0.866813	-17.9382
C0161	A0320	triethyl(pentyl)phosphanium	hydrogen phosphonate	1.06968	-15.1232
C0161	A0391	triethyl(pentyl)phosphanium	4-methyl-1H-imidazol-1-ide	0.905633	-21.7995
C0161	A0412	triethyl(pentyl)phosphanium	hydrogen ethylphosphonate	1.12999	-17.6597
C0161	A0419	triethyl(pentyl)phosphanium	ethyl phosphonate	1.06874	-16.6102
C0161	A0420	triethyl(pentyl)phosphanium	butyl phosphonate	1.07933	-16.2004
C0161	A0457	triethyl(pentyl)phosphanium	hydrogen methylphosphonate	1.17164	-17.8657
C0203	A0012	1-propylpyridin-1-ium	dihydrogen phosphate	0.968837	-9.98553
C0203	A0017	1-propylpyridin-1-ium	hydrogen sulfate	0.652115	-3.32503
C0203	A0024	1-propylpyridin-1-ium	formate	0.932356	-15.9996
C0203	A0030	1-propylpyridin-1-ium	4-methylbenzene-1-sulfonate	0.770139	-5.66232
C0203	A0031	1-propylpyridin-1-ium	benzoate	0.875508	-14.81
C0203	A0033	1-propylpyridin-1-ium	chloride	1.13972	-13.6016
C0203	A0039	1-propylpyridin-1-ium	(2E)-3-carboxyprop-2-enoate	0.784197	-7.8445
C0203	A0044	1-propylpyridin-1-ium	methyl sulfate	0.67821	-4.59202
C0203	A0047	1-propylpyridin-1-ium	(2E)-but-2-enoate	0.984071	-17.4238
C0203	A0050	1-propylpyridin-1-ium	butyl sulfate	0.717324	-4.43473
C0203	A0051	1-propylpyridin-1-ium	perchlorate	0.38027	1.98875
C0203	A0054	1-propylpyridin-1-ium	methanesulfonate	0.821098	-8.49378
C0203	A0062	1-propylpyridin-1-ium	nitrite	0.784855	-11.5871
C0203	A0063	1-propylpyridin-1-ium	dinitroazanide	0.362423	0.82686
C0203	A0064	1-propylpyridin-1-ium	trifluoroacetate	0.515779	-7.76693
C0203	A0070	1-propylpyridin-1-ium	hydrogen carbonate	0.90881	-12.3742
C0203	A0077	1-propylpyridin-1-ium	pentyl sulfate	0.727724	-4.34085
C0203	A0081	1-propylpyridin-1-ium	(2S)-2-hydroxypropanoate	0.737437	-12.198
C0203	A0083	1-propylpyridin-1-ium	ethyl sulfate	0.700922	-4.69606
C0203	A0084	1-propylpyridin-1-ium	trifluoromethanesulfonate	0.383876	-0.74551
C0203	A0087	1-propylpyridin-1-ium	acetate	0.996479	-18.7692
C0203	A0089	1-propylpyridin-1-ium	2-chloroacetate	0.853707	-13.7606
C0203	A0090	1-propylpyridin-1-ium	nitrooxidane	0.619641	-6.68703
C0203	A0091	1-propylpyridin-1-ium	diethyl phosphate	0.877481	-12.6298
C0203	A0092	1-propylpyridin-1-ium	dibutyl phosphate	0.912231	-12.2708
C0203	A0093	1-propylpyridin-1-ium	sulfamate	0.782482	-7.1152
C0203	A0094	1-propylpyridin-1-ium	pyridine-4-carboxylate	0.826319	-13.007
C0203	A0095	1-propylpyridin-1-ium	pyridine-3-carboxylate	0.845695	-13.5552
C0203	A0097	1-propylpyridin-1-ium	O-(difluorophosphoryl)oxidanidolate	0.522191	-6.35735
C0203	A0103	1-propylpyridin-1-ium	ethanesulfonate	0.79636	-8.34097
C0203	A0104	1-propylpyridin-1-ium	propane-1-sulfonate	0.798012	-8.10302
C0203	A0105	1-propylpyridin-1-ium	butane-1-sulfonate	0.804863	-7.96812
C0203	A0106	1-propylpyridin-1-ium	hexane-1-sulfonate	0.818781	-7.73245
C0203	A0107	1-propylpyridin-1-ium	hydrogen oxalate	0.701729	-5.92322
C0203	A0120	1-propylpyridin-1-ium	2-hydroxyacetate	0.764447	-12.3517
C0203	A0121	1-propylpyridin-1-ium	(2R)-2-hydroxypropanoate	0.736674	-12.1109
C0203	A0123	1-propylpyridin-1-ium	bis[(2R)-2,4,4-trimethylpentyl]phosphinate	0.751018	-16.3289
C0203	A0136	1-propylpyridin-1-ium	cyclohexanecarboxylate	0.925422	-18.0097
C0203	A0137	1-propylpyridin-1-ium	2-cyclopentylacetate	0.933792	-17.8634
C0203	A0138	1-propylpyridin-1-ium	cyclopentanecarboxylate	0.925439	-17.8756
C0203	A0145	1-propylpyridin-1-ium	2-hydroxybenzoate	0.627125	-8.1071
C0203	A0152	1-propylpyridin-1-ium	benzenolate	0.784739	-14.5837
C0203	A0153	1-propylpyridin-1-ium	4-methylbenzen-1-olate	0.812998	-15.3861
C0203	A0154	1-propylpyridin-1-ium	4-methoxybenzen-1-olate	0.819924	-14.9913
C0203	A0155	1-propylpyridin-1-ium	4-fluorobenzen-1-olate	0.716765	-14.3522
C0203	A0157	1-propylpyridin-1-ium	butanoate	0.96269	-18.2471
C0203	A0158	1-propylpyridin-1-ium	hexanoate	0.97206	-17.959
C0203	A0161	1-propylpyridin-1-ium	2,2-dimethylpropanoate	0.87357	-17.7095
C0203	A0163	1-propylpyridin-1-ium	ethanethioate	0.81135	-8.0738
C0203	A0173	1-propylpyridin-1-ium	(2E)-but-2-enoate	0.982528	-17.3993
C0203	A0175	1-propylpyridin-1-ium	2-methylbenzene-1-sulfonate	0.704461	-5.33421
C0203	A0179	1-propylpyridin-1-ium	1H-1,3-benzodiazol-1-ide	0.672809	-12.1392
C0203	A0189	1-propylpyridin-1-ium	dimethyl phosphate	0.935658	-12.643
C0203	A0194	1-propylpyridin-1-ium	2-methylpropanoate	0.926986	-17.9373
C0203	A0195	1-propylpyridin-1-ium	4-oxopentanoate	1.01697	-17.1035
C0203	A0197	1-propylpyridin-1-ium	methyl phosphonate	0.896966	-13.7296
C0203	A0199	1-propylpyridin-1-ium	propanoate	0.962315	-18.3834
C0203	A0202	1-propylpyridin-1-ium	2-aminoethane-1-sulfonate	0.853374	-9.41232
C0203	A0205	1-propylpyridin-1-ium	1H-1,2,3-triazol-1-ide	0.824107	-13.2541
C0203	A0206	1-propylpyridin-1-ium	1H-1,2,3,4-tetrazol-5-ide	0.855014	-14.3006
C0203	A0208	1-propylpyridin-1-ium	2-fluorobenzen-1-olate	0.691145	-12.6307
C0203	A0210	1-propylpyridin-1-ium	2,2,2-trifluoroethan-1-olate	0.820195	-22.4263
C0203	A0212	1-propylpyridin-1-ium	2-oxopyrrolidin-1-ide	1.03736	-21.1049
C0203	A0235	1-propylpyridin-1-ium	4-chlorobenzen-1-olate	0.725182	-12.9656
C0203	A0237	1-propylpyridin-1-ium	3-chlorobenzen-1-olate	0.699548	-12.0347
C0203	A0239	1-propylpyridin-1-ium	2,4-dichlorobenzen-1-olate	0.674395	-10.6739
C0203	A0240	1-propylpyridin-1-ium	2,4,6-trichlorobenzen-1-olate	0.649263	-8.01396
C0203	A0241	1-propylpyridin-1-ium	3-methylbenzen-1-olate	0.807579	-15.026
C0203	A0242	1-propylpyridin-1-ium	2-methylbenzen-1-olate	0.733896	-13.8222
C0203	A0243	1-propylpyridin-1-ium	2,4-dimethylbenzen-1-olate	0.76529	-14.8471
C0203	A0257	1-propylpyridin-1-ium	1H-pyrazol-1-ide	0.866709	-16.3239
C0203	A0269	1-propylpyridin-1-ium	2-carboxyacetate	0.861644	-9.78634
C0203	A0270	1-propylpyridin-1-ium	benzenesulfonate	0.74567	-5.32705
C0203	A0272	1-propylpyridin-1-ium	fluoranesulfonate	0.43064	-0.14171
C0203	A0273	1-propylpyridin-1-ium	2-methoxyacetate	1.00078	-16.1586
C0203	A0278	1-propylpyridin-1-ium	hexyl sulfate	0.739529	-4.23645
C0203	A0279	1-propylpyridin-1-ium	ethyl phosphonite	0.91121	-15.7055
C0203	A0280	1-propylpyridin-1-ium	butyl phosphonite	0.922359	-15.2912
C0203	A0281	1-propylpyridin-1-ium	hexyl phosphonite	0.937306	-15.0256
C0203	A0295	1-propylpyridin-1-ium	1H-1,2,4-triazol-1-ide	0.812314	-14.1225
C0203	A0296	1-propylpyridin-1-ium	1H-1,2,3,4-tetrazol-1-ide	0.708606	-9.46466
C0203	A0307	1-propylpyridin-1-ium	(1r,4r)-4-fluorocyclohexan-1-olate	1.11436	-28.7077
C0203	A0317	1-propylpyridin-1-ium	pyridin-3-olate	0.749376	-13.0733
C0203	A0320	1-propylpyridin-1-ium	hydrogen phosphonate	0.947368	-12.1919
C0203	A0391	1-propylpyridin-1-ium	4-methyl-1H-imidazol-1-ide	0.780384	-15.7293
C0203	A0412	1-propylpyridin-1-ium	hydrogen ethylphosphonate	0.987754	-13.9401
C0203	A0419	1-propylpyridin-1-ium	ethyl phosphonate	0.912152	-13.2313
C0203	A0420	1-propylpyridin-1-ium	butyl phosphonate	0.916195	-12.8378
C0203	A0457	1-propylpyridin-1-ium	hydrogen methylphosphonate	1.0347	-14.3605
C0214	A0012	1,3-diethyl-2-methyl-1H-imidazol-3-ium	dihydrogen phosphate	1.09149	-12.6038
C0214	A0017	1,3-diethyl-2-methyl-1H-imidazol-3-ium	hydrogen sulfate	0.759813	-5.20963
C0214	A0024	1,3-diethyl-2-methyl-1H-imidazol-3-ium	formate	1.07228	-19.577
C0214	A0030	1,3-diethyl-2-methyl-1H-imidazol-3-ium	4-methylbenzene-1-sulfonate	0.868981	-7.19671
C0214	A0031	1,3-diethyl-2-methyl-1H-imidazol-3-ium	benzoate	0.987842	-18.611
C0214	A0033	1,3-diethyl-2-methyl-1H-imidazol-3-ium	chloride	1.30067	-16.2541
C0214	A0039	1,3-diethyl-2-methyl-1H-imidazol-3-ium	(2E)-3-carboxyprop-2-enoate	0.883343	-10.342
C0214	A0044	1,3-diethyl-2-methyl-1H-imidazol-3-ium	methyl sulfate	0.785312	-6.22595
C0214	A0047	1,3-diethyl-2-methyl-1H-imidazol-3-ium	(2E)-but-2-enoate	1.12136	-21.5141
C0214	A0050	1,3-diethyl-2-methyl-1H-imidazol-3-ium	butyl sulfate	0.815585	-5.64873
C0214	A0051	1,3-diethyl-2-methyl-1H-imidazol-3-ium	perchlorate	0.452633	1.19669
C0214	A0054	1,3-diethyl-2-methyl-1H-imidazol-3-ium	methanesulfonate	0.951535	-10.6307
C0214	A0062	1,3-diethyl-2-methyl-1H-imidazol-3-ium	nitrite	0.916036	-14.7037
C0214	A0063	1,3-diethyl-2-methyl-1H-imidazol-3-ium	dinitroazanide	0.420075	-0.0338
C0214	A0064	1,3-diethyl-2-methyl-1H-imidazol-3-ium	trifluoroacetate	0.600179	-10.0602
C0214	A0070	1,3-diethyl-2-methyl-1H-imidazol-3-ium	hydrogen carbonate	1.03969	-15.3285
C0214	A0077	1,3-diethyl-2-methyl-1H-imidazol-3-ium	pentyl sulfate	0.823178	-5.45691
C0214	A0081	1,3-diethyl-2-methyl-1H-imidazol-3-ium	(2S)-2-hydroxypropanoate	0.854613	-15.227
C0214	A0083	1,3-diethyl-2-methyl-1H-imidazol-3-ium	ethyl sulfate	0.806312	-6.18873
C0214	A0084	1,3-diethyl-2-methyl-1H-imidazol-3-ium	trifluoromethanesulfonate	0.439519	-1.49256
C0214	A0087	1,3-diethyl-2-methyl-1H-imidazol-3-ium	acetate	1.13993	-22.9764
C0214	A0089	1,3-diethyl-2-methyl-1H-imidazol-3-ium	2-chloroacetate	0.976815	-17.1042
C0214	A0090	1,3-diethyl-2-methyl-1H-imidazol-3-ium	nitrooxidane	0.732224	-8.98307
C0214	A0091	1,3-diethyl-2-methyl-1H-imidazol-3-ium	diethyl phosphate	1.00507	-15.243
C0214	A0092	1,3-diethyl-2-methyl-1H-imidazol-3-ium	dibutyl phosphate	1.03691	-14.6554
C0214	A0093	1,3-diethyl-2-methyl-1H-imidazol-3-ium	sulfamate	0.902004	-9.17059
C0214	A0094	1,3-diethyl-2-methyl-1H-imidazol-3-ium	pyridine-4-carboxylate	0.936227	-16.431
C0214	A0095	1,3-diethyl-2-methyl-1H-imidazol-3-ium	pyridine-3-carboxylate	0.957754	-17.0731
C0214	A0097	1,3-diethyl-2-methyl-1H-imidazol-3-ium	O-(difluorophosphoryl)oxidanidolate	0.613681	-8.3866
C0214	A0103	1,3-diethyl-2-methyl-1H-imidazol-3-ium	ethanesulfonate	0.92302	-10.3946
C0214	A0104	1,3-diethyl-2-methyl-1H-imidazol-3-ium	propane-1-sulfonate	0.92178	-10.0201
C0214	A0105	1,3-diethyl-2-methyl-1H-imidazol-3-ium	butane-1-sulfonate	0.926275	-9.77259
C0214	A0106	1,3-diethyl-2-methyl-1H-imidazol-3-ium	hexane-1-sulfonate	0.936207	-9.36279
C0214	A0107	1,3-diethyl-2-methyl-1H-imidazol-3-ium	hydrogen oxalate	0.805433	-8.28757
C0214	A0120	1,3-diethyl-2-methyl-1H-imidazol-3-ium	2-hydroxyacetate	0.888026	-15.4678
C0214	A0121	1,3-diethyl-2-methyl-1H-imidazol-3-ium	(2R)-2-hydroxypropanoate	0.853947	-15.1255
C0214	A0123	1,3-diethyl-2-methyl-1H-imidazol-3-ium	bis[(2R)-2,4,4-trimethylpentyl]phosphinate	0.850152	-19.7614
C0214	A0136	1,3-diethyl-2-methyl-1H-imidazol-3-ium	cyclohexanecarboxylate	1.05657	-22.0173
C0214	A0137	1,3-diethyl-2-methyl-1H-imidazol-3-ium	2-cyclopentylacetate	1.06527	-21.8274
C0214	A0138	1,3-diethyl-2-methyl-1H-imidazol-3-ium	cyclopentanecarboxylate	1.05521	-21.8962
C0214	A0145	1,3-diethyl-2-methyl-1H-imidazol-3-ium	2-hydroxybenzoate	0.702448	-10.5578
C0214	A0152	1,3-diethyl-2-methyl-1H-imidazol-3-ium	benzenolate	0.882015	-18.42
C0214	A0153	1,3-diethyl-2-methyl-1H-imidazol-3-ium	4-methylbenzen-1-olate	0.908572	-19.2502
C0214	A0154	1,3-diethyl-2-methyl-1H-imidazol-3-ium	4-methoxybenzen-1-olate	0.919117	-18.7437
C0214	A0155	1,3-diethyl-2-methyl-1H-imidazol-3-ium	4-fluorobenzen-1-olate	0.802268	-18.0872
C0214	A0157	1,3-diethyl-2-methyl-1H-imidazol-3-ium	butanoate	1.09785	-22.3705
C0214	A0158	1,3-diethyl-2-methyl-1H-imidazol-3-ium	hexanoate	1.10622	-21.9285
C0214	A0161	1,3-diethyl-2-methyl-1H-imidazol-3-ium	2,2-dimethylpropanoate	0.994424	-21.779
C0214	A0163	1,3-diethyl-2-methyl-1H-imidazol-3-ium	ethanethioate	0.923903	-10.6924
C0214	A0173	1,3-diethyl-2-methyl-1H-imidazol-3-ium	(2E)-but-2-enoate	1.11969	-21.4835
C0214	A0175	1,3-diethyl-2-methyl-1H-imidazol-3-ium	2-methylbenzene-1-sulfonate	0.7936	-6.85984
C0214	A0179	1,3-diethyl-2-methyl-1H-imidazol-3-ium	1H-1,3-benzodiazol-1-ide	0.753286	-15.699
C0214	A0189	1,3-diethyl-2-methyl-1H-imidazol-3-ium	dimethyl phosphate	1.07438	-15.3336
C0214	A0194	1,3-diethyl-2-methyl-1H-imidazol-3-ium	2-methylpropanoate	1.05818	-22.0195
C0214	A0195	1,3-diethyl-2-methyl-1H-imidazol-3-ium	4-oxopentanoate	1.16015	-20.8749
C0214	A0197	1,3-diethyl-2-methyl-1H-imidazol-3-ium	methyl phosphonate	1.03146	-16.6425
C0214	A0199	1,3-diethyl-2-methyl-1H-imidazol-3-ium	propanoate	1.09906	-22.5503
C0214	A0202	1,3-diethyl-2-methyl-1H-imidazol-3-ium	2-aminoethane-1-sulfonate	0.976684	-11.5774
C0214	A0205	1,3-diethyl-2-methyl-1H-imidazol-3-ium	1H-1,2,3-triazol-1-ide	0.9489	-16.8313
C0214	A0206	1,3-diethyl-2-methyl-1H-imidazol-3-ium	1H-1,2,3,4-tetrazol-5-ide	0.968876	-18.1394
C0214	A0208	1,3-diethyl-2-methyl-1H-imidazol-3-ium	2-fluorobenzen-1-olate	0.775332	-16.049
C0214	A0210	1,3-diethyl-2-methyl-1H-imidazol-3-ium	2,2,2-trifluoroethan-1-olate	0.918441	-27.4972
C0214	A0212	1,3-diethyl-2-methyl-1H-imidazol-3-ium	2-oxopyrrolidin-1-ide	1.17427	-25.7101
C0214	A0235	1,3-diethyl-2-methyl-1H-imidazol-3-ium	4-chlorobenzen-1-olate	0.798882	-16.3412
C0214	A0237	1,3-diethyl-2-methyl-1H-imidazol-3-ium	3-chlorobenzen-1-olate	0.769368	-15.2181
C0214	A0239	1,3-diethyl-2-methyl-1H-imidazol-3-ium	2,4-dichlorobenzen-1-olate	0.723815	-13.4342
C0214	A0240	1,3-diethyl-2-methyl-1H-imidazol-3-ium	2,4,6-trichlorobenzen-1-olate	0.674417	-10.0039
C0214	A0241	1,3-diethyl-2-methyl-1H-imidazol-3-ium	3-methylbenzen-1-olate	0.904039	-18.8239
C0214	A0242	1,3-diethyl-2-methyl-1H-imidazol-3-ium	2-methylbenzen-1-olate	0.816919	-17.4468
C0214	A0243	1,3-diethyl-2-methyl-1H-imidazol-3-ium	2,4-dimethylbenzen-1-olate	0.847004	-18.556
C0214	A0257	1,3-diethyl-2-methyl-1H-imidazol-3-ium	1H-pyrazol-1-ide	0.991182	-20.5874
C0214	A0269	1,3-diethyl-2-methyl-1H-imidazol-3-ium	2-carboxyacetate	0.97681	-12.55
C0214	A0270	1,3-diethyl-2-methyl-1H-imidazol-3-ium	benzenesulfonate	0.842687	-6.94302
C0214	A0272	1,3-diethyl-2-methyl-1H-imidazol-3-ium	fluoranesulfonate	0.507209	-1.30189
C0214	A0273	1,3-diethyl-2-methyl-1H-imidazol-3-ium	2-methoxyacetate	1.14766	-19.7297
C0214	A0278	1,3-diethyl-2-methyl-1H-imidazol-3-ium	hexyl sulfate	0.832606	-5.26776
C0214	A0279	1,3-diethyl-2-methyl-1H-imidazol-3-ium	ethyl phosphonite	1.03436	-19.2055
C0214	A0280	1,3-diethyl-2-methyl-1H-imidazol-3-ium	butyl phosphonite	1.04074	-18.5755
C0214	A0281	1,3-diethyl-2-methyl-1H-imidazol-3-ium	hexyl phosphonite	1.05217	-18.1879
C0214	A0295	1,3-diethyl-2-methyl-1H-imidazol-3-ium	1H-1,2,4-triazol-1-ide	0.934278	-17.8762
C0214	A0296	1,3-diethyl-2-methyl-1H-imidazol-3-ium	1H-1,2,3,4-tetrazol-1-ide	0.820762	-12.4722
C0214	A0307	1,3-diethyl-2-methyl-1H-imidazol-3-ium	(1r,4r)-4-fluorocyclohexan-1-olate	1.23215	-34.782
C0214	A0317	1,3-diethyl-2-methyl-1H-imidazol-3-ium	pyridin-3-olate	0.84759	-16.5094
C0214	A0320	1,3-diethyl-2-methyl-1H-imidazol-3-ium	hydrogen phosphonate	1.07668	-15.0296
C0214	A0391	1,3-diethyl-2-methyl-1H-imidazol-3-ium	4-methyl-1H-imidazol-1-ide	0.888814	-19.8865
C0214	A0412	1,3-diethyl-2-methyl-1H-imidazol-3-ium	hydrogen ethylphosphonate	1.12098	-16.9579
C0214	A0419	1,3-diethyl-2-methyl-1H-imidazol-3-ium	ethyl phosphonate	1.04768	-15.9922
C0214	A0420	1,3-diethyl-2-methyl-1H-imidazol-3-ium	butyl phosphonate	1.04768	-15.414
C0214	A0457	1,3-diethyl-2-methyl-1H-imidazol-3-ium	hydrogen methylphosphonate	1.17322	-17.4478
C0225	A0012	2-oxoazepan-1-ium	dihydrogen phosphate	0.686394	-3.21564
C0225	A0017	2-oxoazepan-1-ium	hydrogen sulfate	0.463162	1.77917
C0225	A0024	2-oxoazepan-1-ium	formate	0.619955	-8.4506
C0225	A0030	2-oxoazepan-1-ium	4-methylbenzene-1-sulfonate	0.599732	-2.71954
C0225	A0031	2-oxoazepan-1-ium	benzoate	0.601158	-7.06491
C0225	A0033	2-oxoazepan-1-ium	chloride	0.804575	-7.94744
C0225	A0039	2-oxoazepan-1-ium	(2E)-3-carboxyprop-2-enoate	0.54921	-2.037
C0225	A0044	2-oxoazepan-1-ium	methyl sulfate	0.505686	-0.63729
C0225	A0047	2-oxoazepan-1-ium	(2E)-but-2-enoate	0.678675	-9.46353
C0225	A0050	2-oxoazepan-1-ium	butyl sulfate	0.582712	-1.76561
C0225	A0051	2-oxoazepan-1-ium	perchlorate	0.287708	3.26677
C0225	A0054	2-oxoazepan-1-ium	methanesulfonate	0.600178	-3.81776
C0225	A0062	2-oxoazepan-1-ium	nitrite	0.531258	-3.90131
C0225	A0063	2-oxoazepan-1-ium	dinitroazanide	0.297771	2.01348
C0225	A0064	2-oxoazepan-1-ium	trifluoroacetate	0.339456	-2.14124
C0225	A0070	2-oxoazepan-1-ium	hydrogen carbonate	0.615706	-5.4779
C0225	A0077	2-oxoazepan-1-ium	pentyl sulfate	0.60156	-1.90354
C0225	A0081	2-oxoazepan-1-ium	(2S)-2-hydroxypropanoate	0.495413	-5.37506
C0225	A0083	2-oxoazepan-1-ium	ethyl sulfate	0.541508	-1.27844
C0225	A0084	2-oxoazepan-1-ium	trifluoromethanesulfonate	0.318974	0.81882
C0225	A0087	2-oxoazepan-1-ium	acetate	0.66929	-10.2747
C0225	A0089	2-oxoazepan-1-ium	2-chloroacetate	0.581031	-6.39434
C0225	A0090	2-oxoazepan-1-ium	nitrooxidane	0.417909	-0.36242
C0225	A0091	2-oxoazepan-1-ium	diethyl phosphate	0.633986	-7.8911
C0225	A0092	2-oxoazepan-1-ium	dibutyl phosphate	0.69249	-8.11363
C0225	A0093	2-oxoazepan-1-ium	sulfamate	0.563895	-1.84908
C0225	A0094	2-oxoazepan-1-ium	pyridine-4-carboxylate	0.569785	-6.17453
C0225	A0095	2-oxoazepan-1-ium	pyridine-3-carboxylate	0.580697	-6.52522
C0225	A0097	2-oxoazepan-1-ium	O-(difluorophosphoryl)oxidanidolate	0.335741	-1.09955
C0225	A0103	2-oxoazepan-1-ium	ethanesulfonate	0.586705	-4.08937
C0225	A0104	2-oxoazepan-1-ium	propane-1-sulfonate	0.601095	-4.26103
C0225	A0105	2-oxoazepan-1-ium	butane-1-sulfonate	0.617692	-4.44242
C0225	A0106	2-oxoazepan-1-ium	hexane-1-sulfonate	0.646985	-4.6514
C0225	A0107	2-oxoazepan-1-ium	hydrogen oxalate	0.470456	0.3825
C0225	A0120	2-oxoazepan-1-ium	2-hydroxyacetate	0.503531	-5.26029
C0225	A0121	2-oxoazepan-1-ium	(2R)-2-hydroxypropanoate	0.49483	-5.30608
C0225	A0123	2-oxoazepan-1-ium	bis[(2R)-2,4,4-trimethylpentyl]phosphinate	0.522101	-10.0672
C0225	A0136	2-oxoazepan-1-ium	cyclohexanecarboxylate	0.644184	-10.0791
C0225	A0137	2-oxoazepan-1-ium	2-cyclopentylacetate	0.656056	-10.0759
C0225	A0138	2-oxoazepan-1-ium	cyclopentanecarboxylate	0.641133	-9.84026
[truncated: 6,992 more rows]
